# Supplementary material for: A Negative Energy Balance Is Associated with Metabolic Dysfunctions in the Hypothalamus of a Humanized Preclinical Model of Alzheimer’s Disease, the 5XFAD Mouse
Source: MDPI journal article supplement (doi:10.3390/ijms22105365), 2021-05-20

# Figure S5. Unedited blots from Figure 2

**LRP1 males**

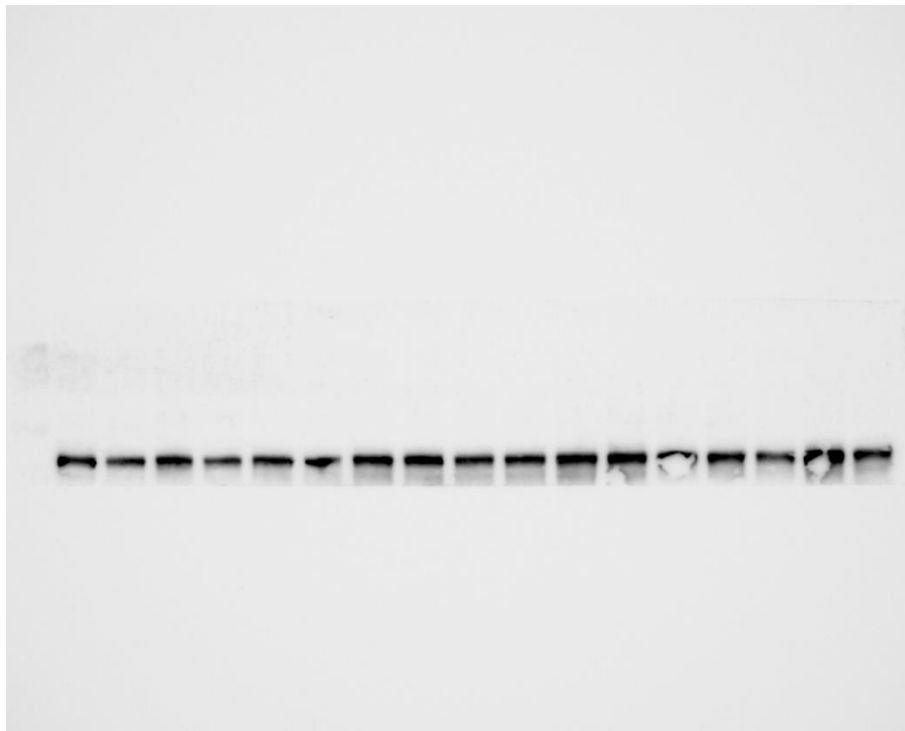

**LRP1 females**

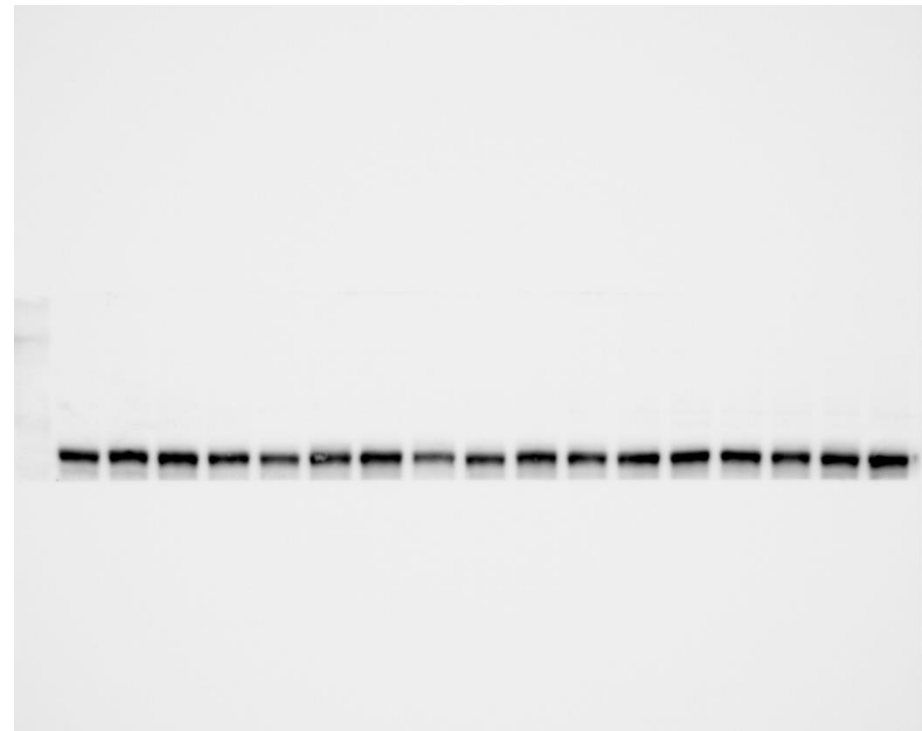

**AT8-Tau males**

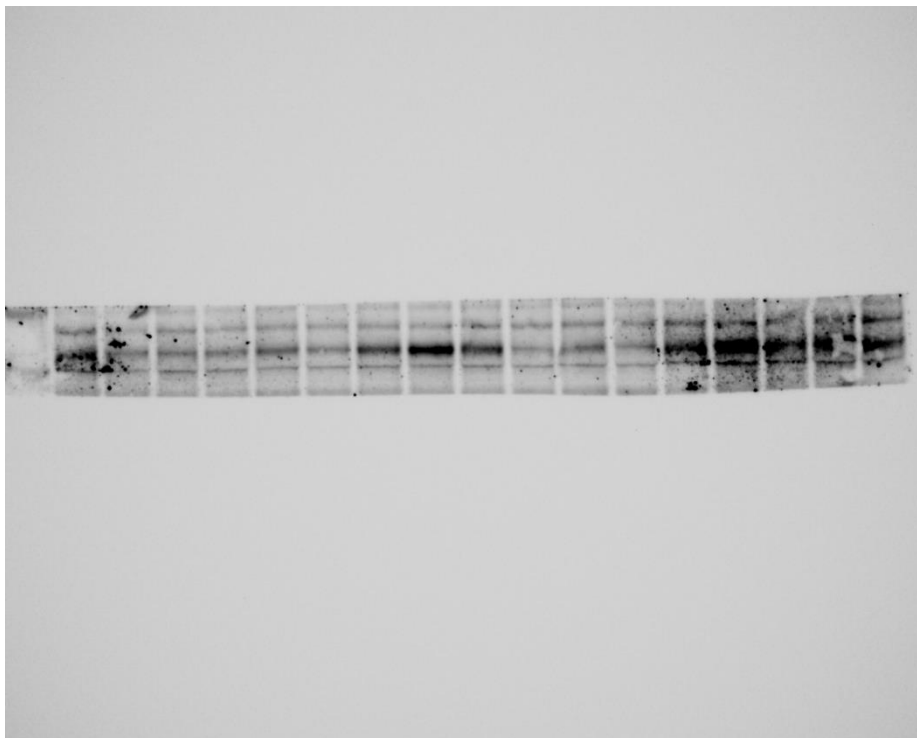

**AT8-Tau females**

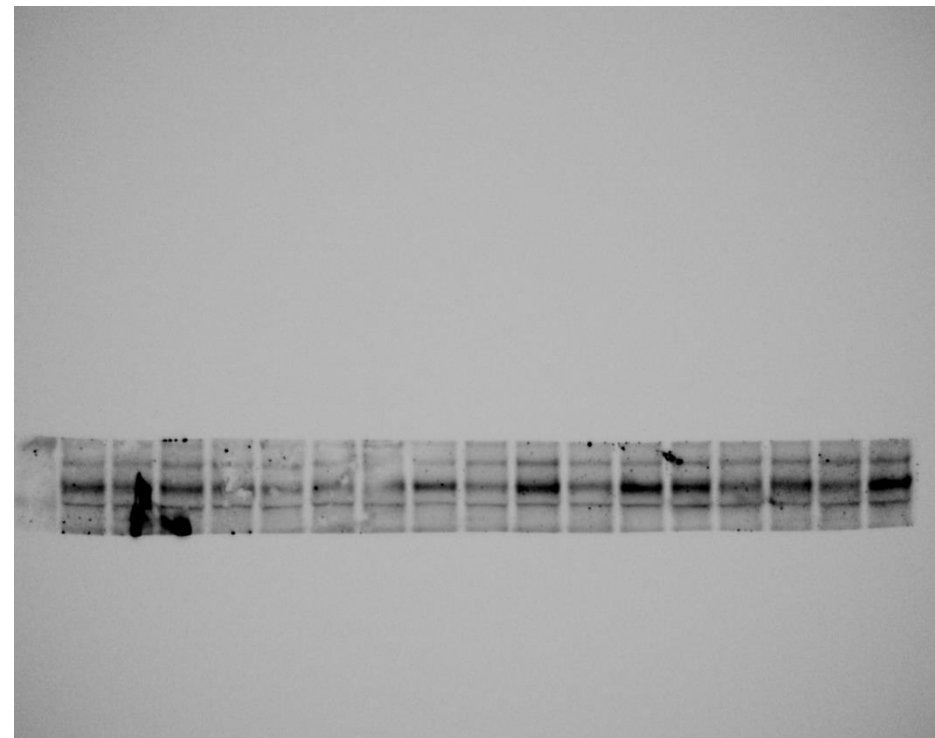

# Figure S5. Unedited blots from Figure 2

**Tau males**

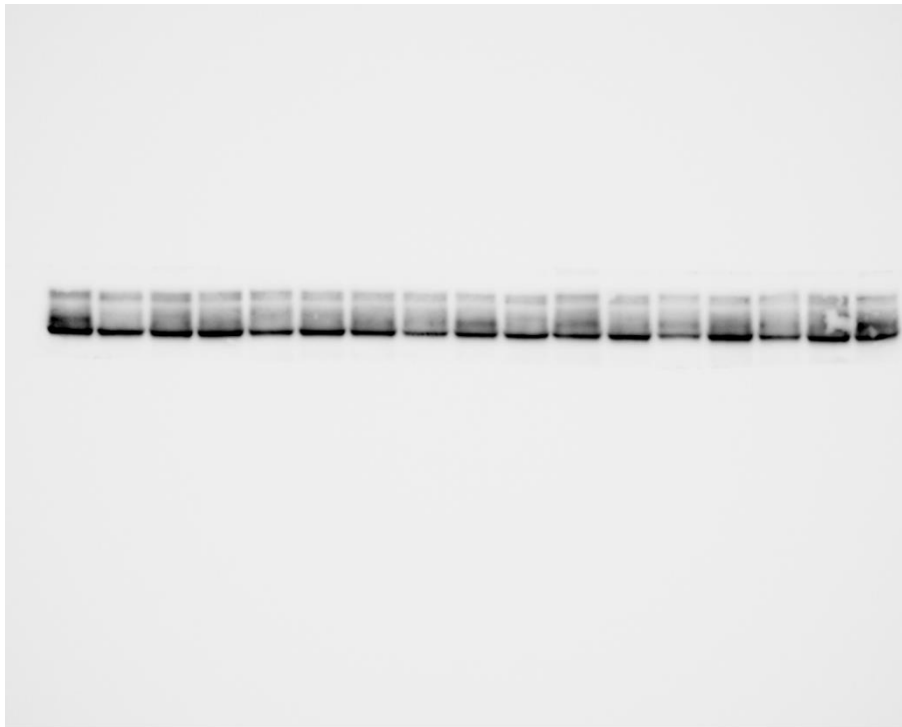

**Tau females**

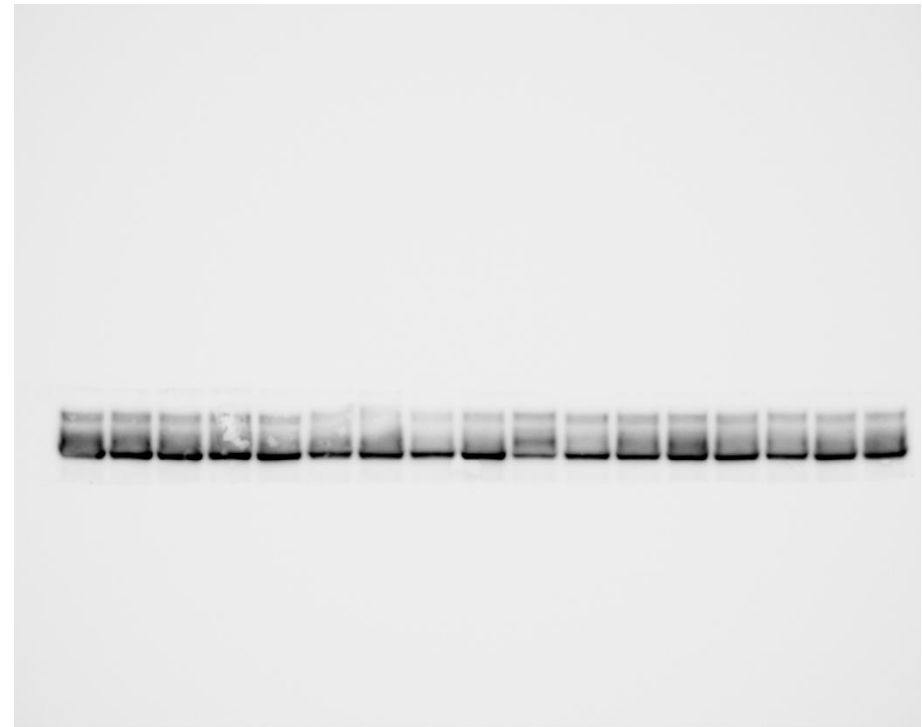

**p35 males**

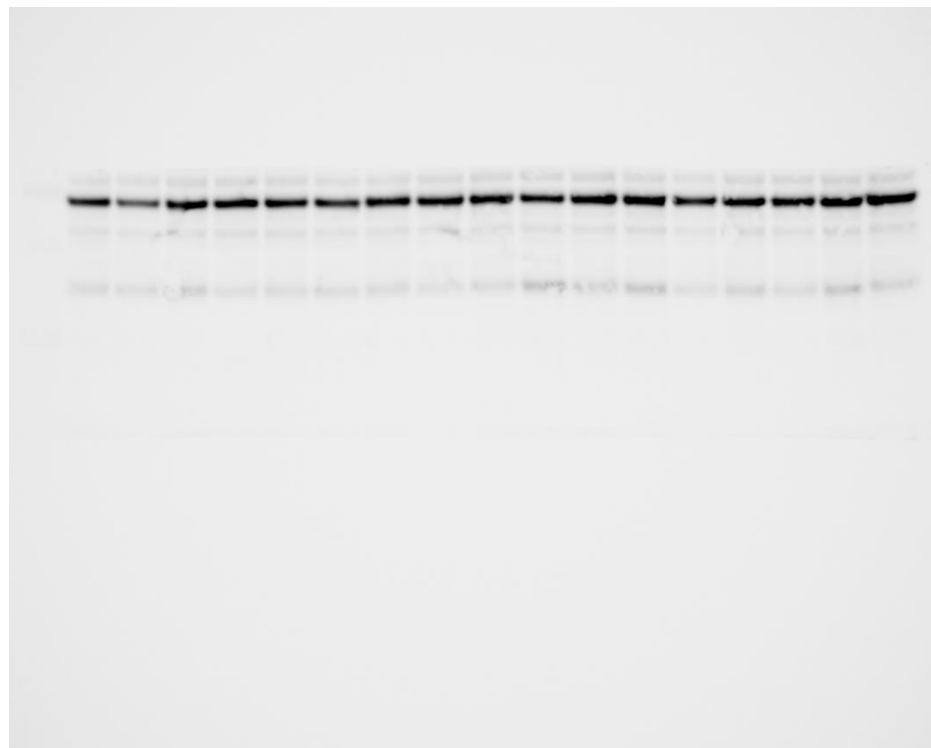

**p35 females**

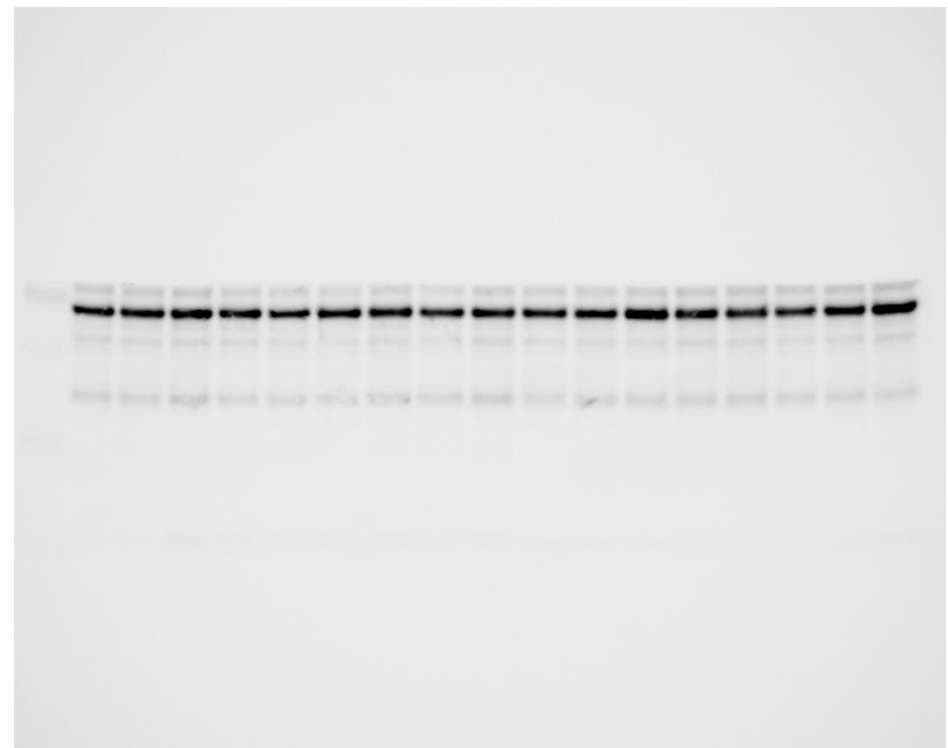

# Figure S5. Unedited blots from Figure 2

**CDK5 males**

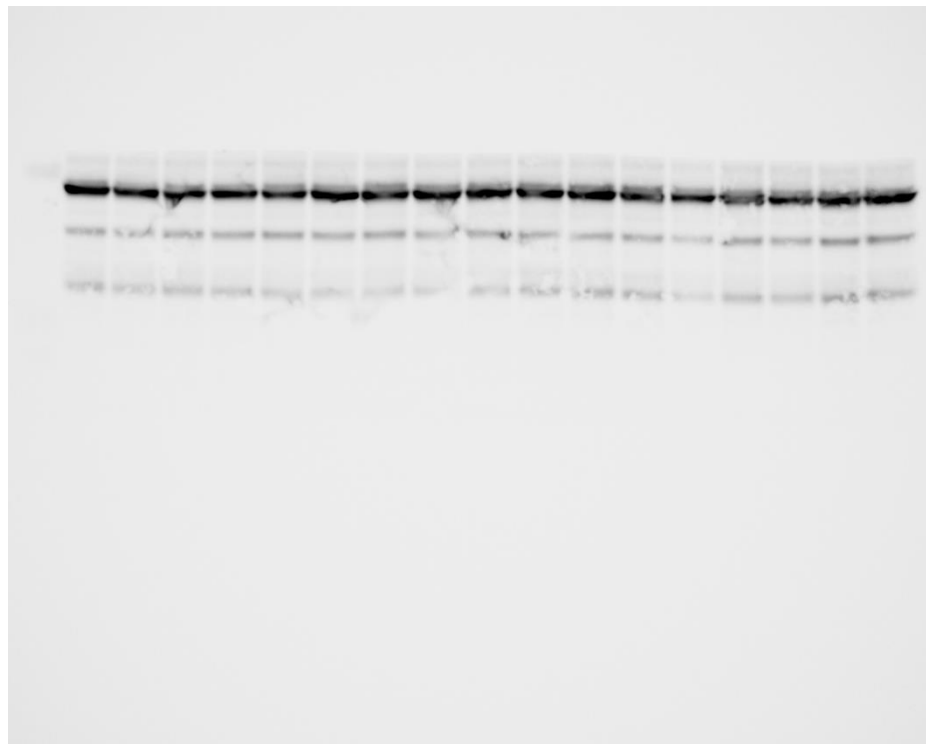

**CDK5 females**

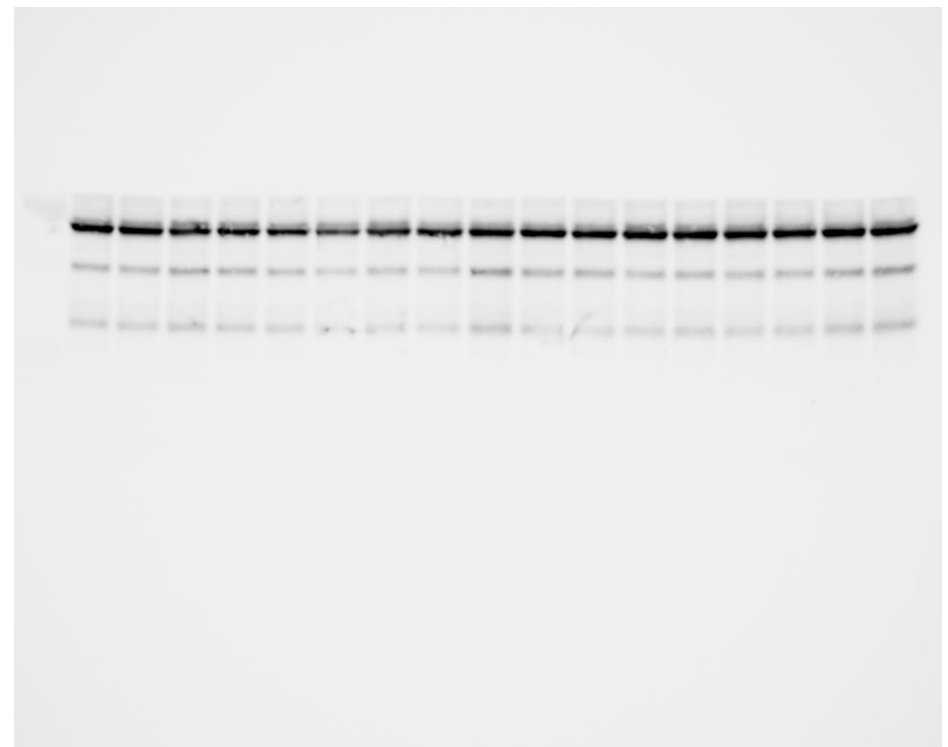

**p25 males**

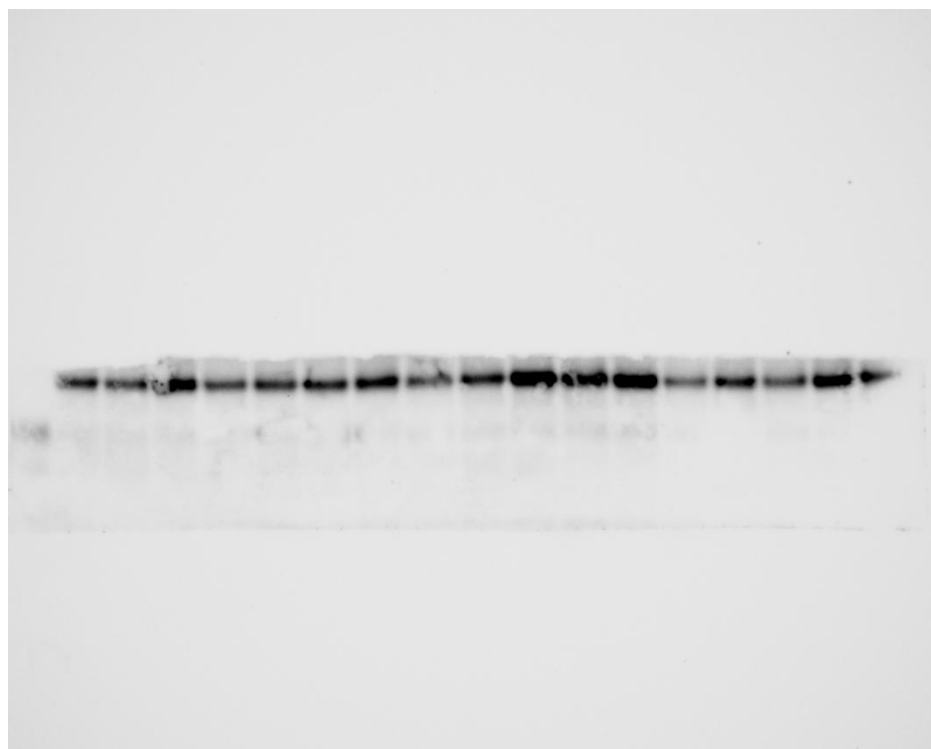

**p25 females**

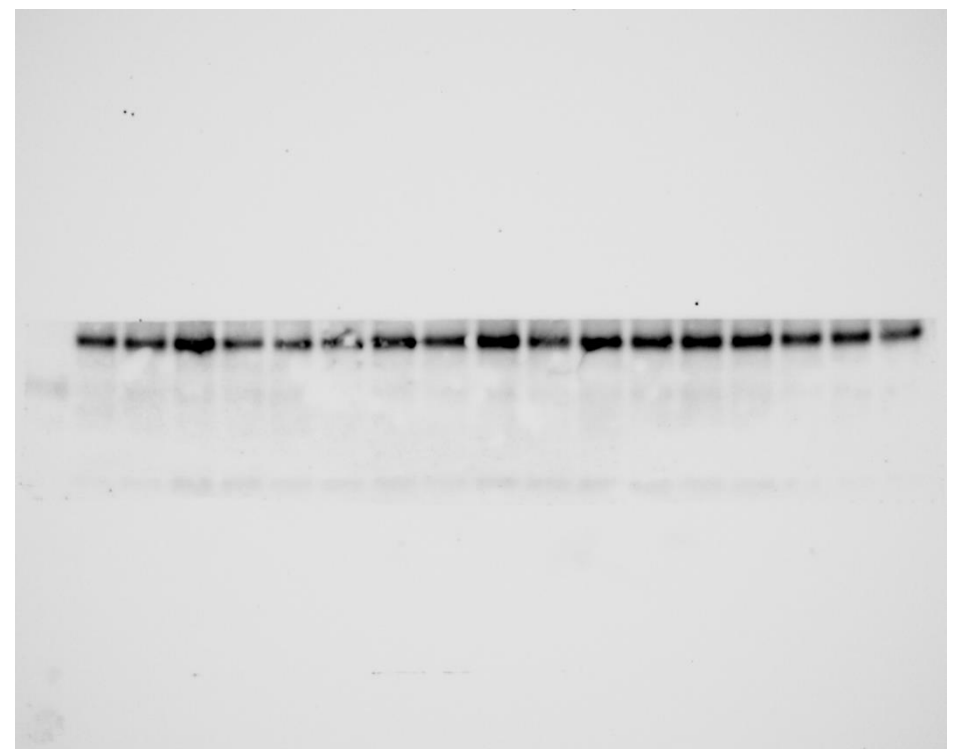

## Figure S5. Unedited blots from Figure 2

**$\gamma$ -adaptin males**

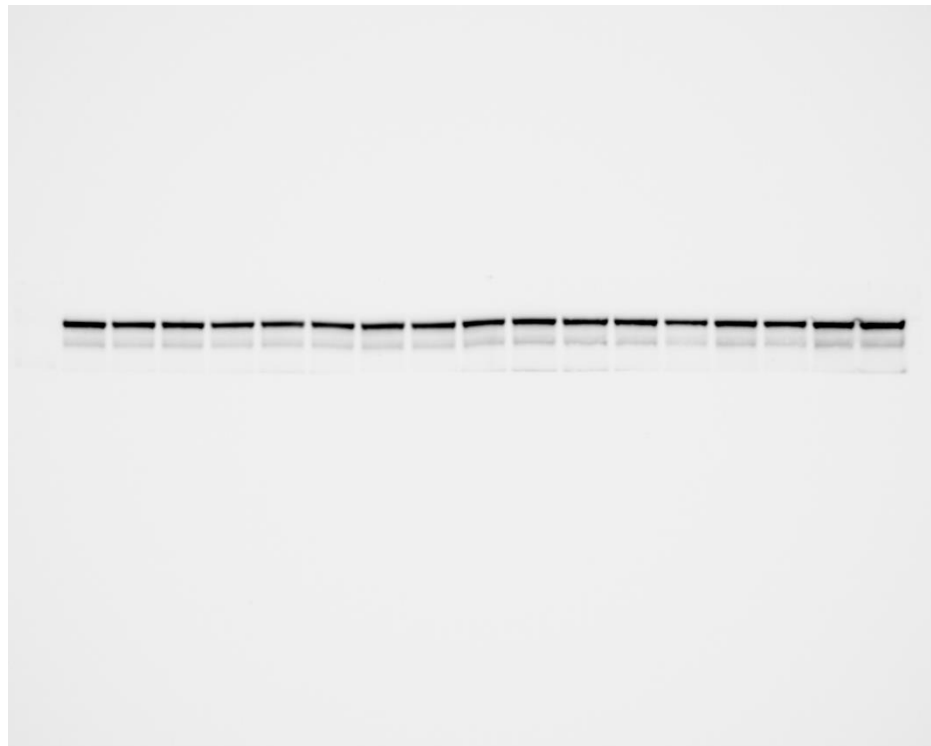

**$\gamma$ -adaptin females**

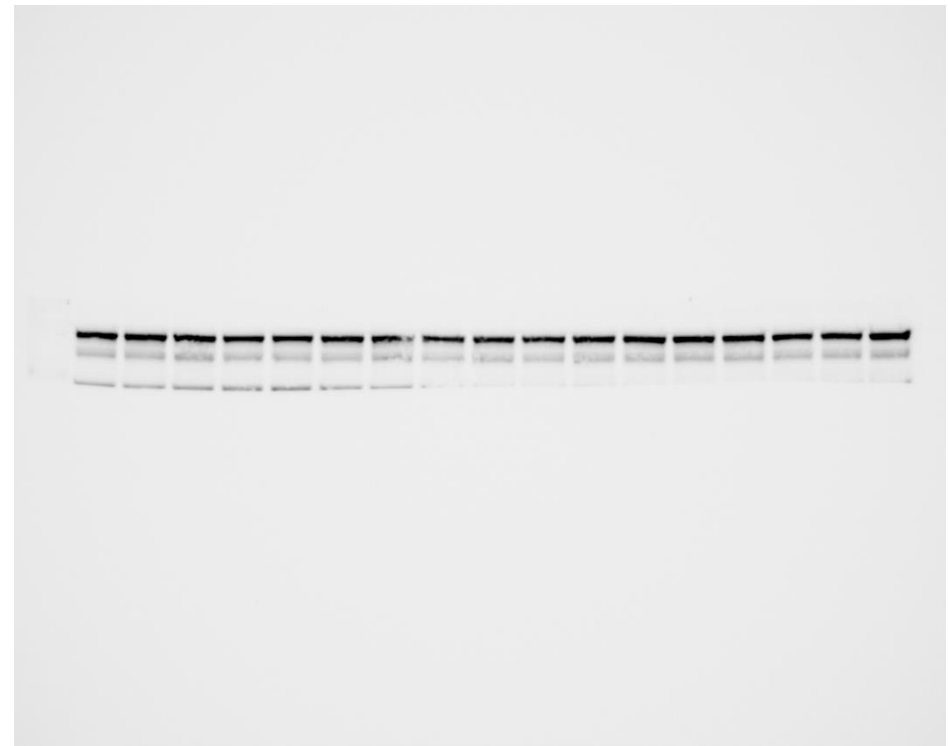

**Ponceau staining males**

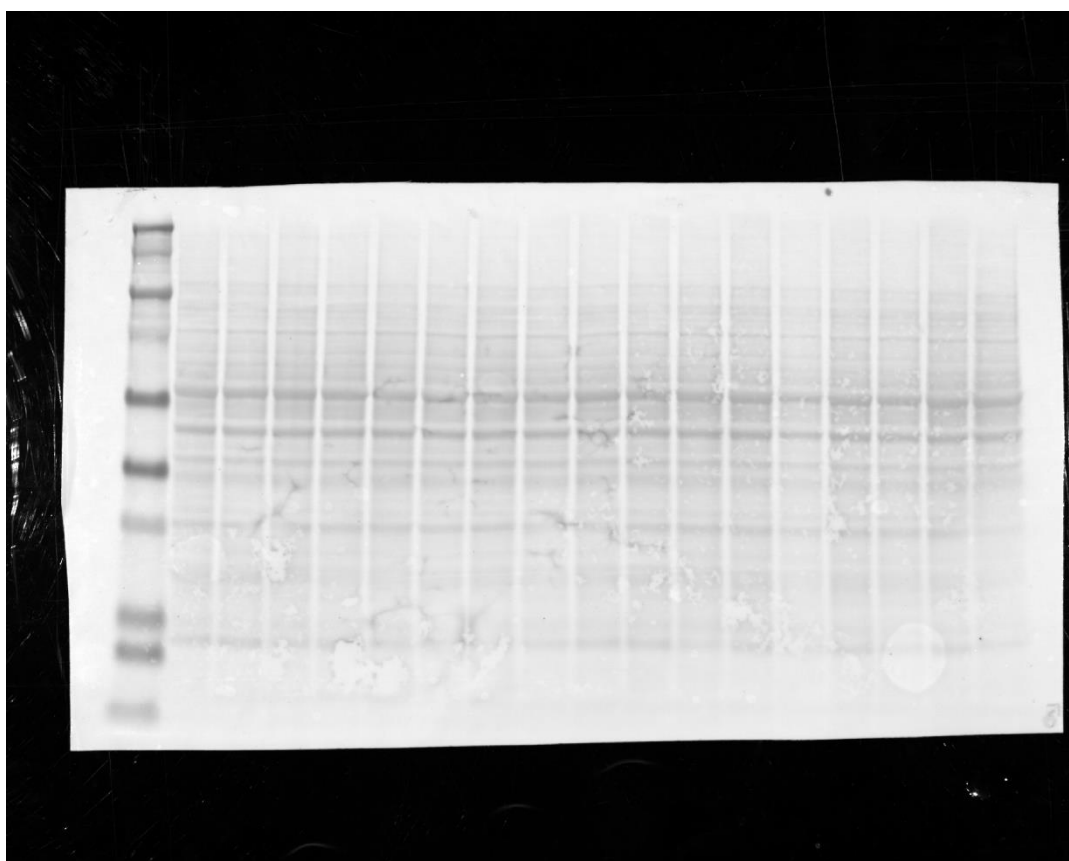

**Ponceau staining females**

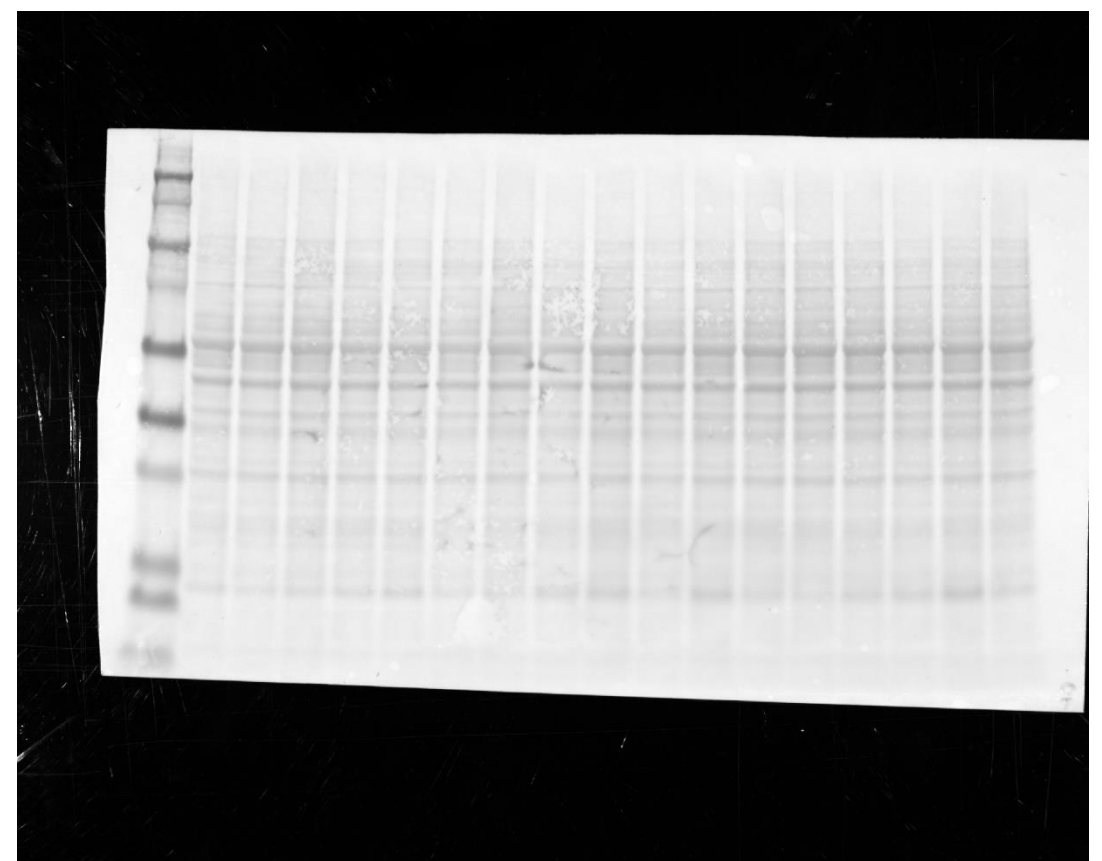

# Figure S5. Unedited blots from Figure 3

**GFAP males**

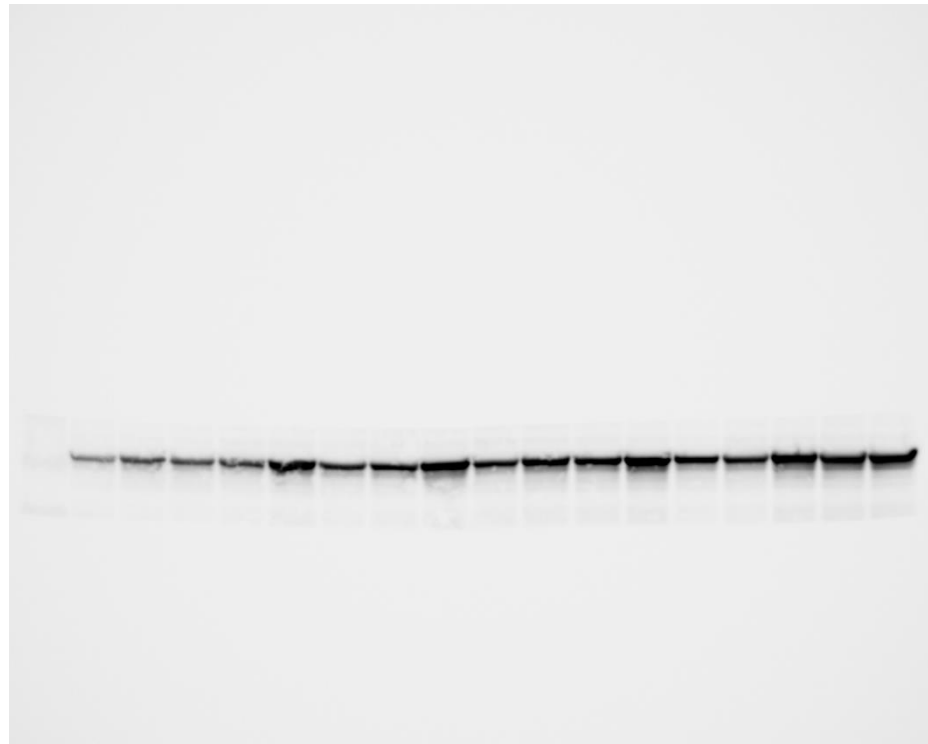

**GFAP females**

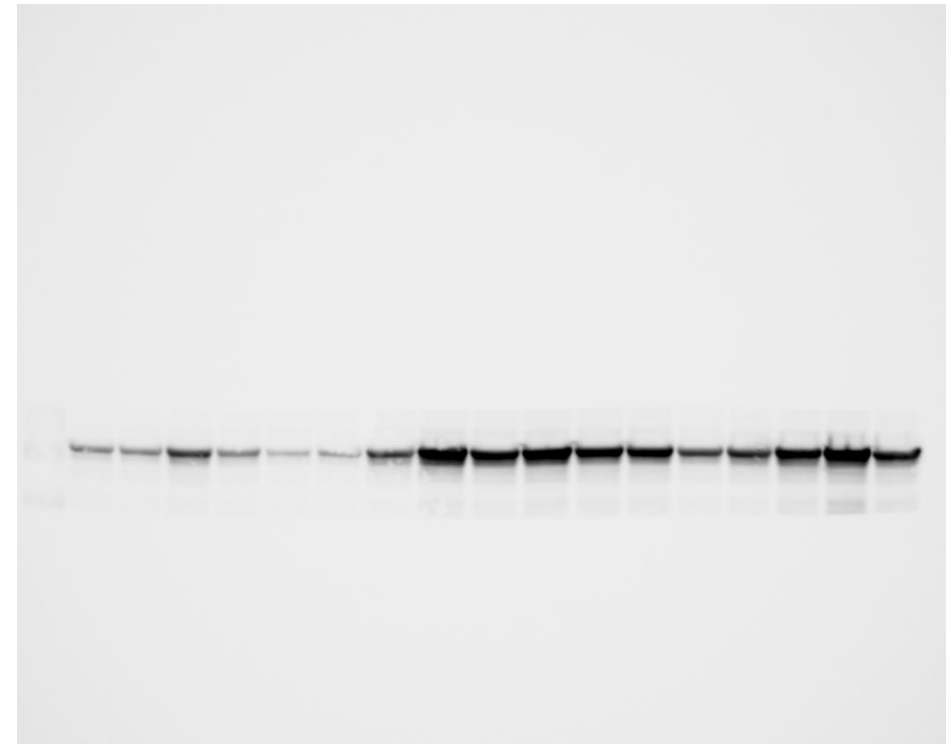

**IL-1 $\beta$  males**

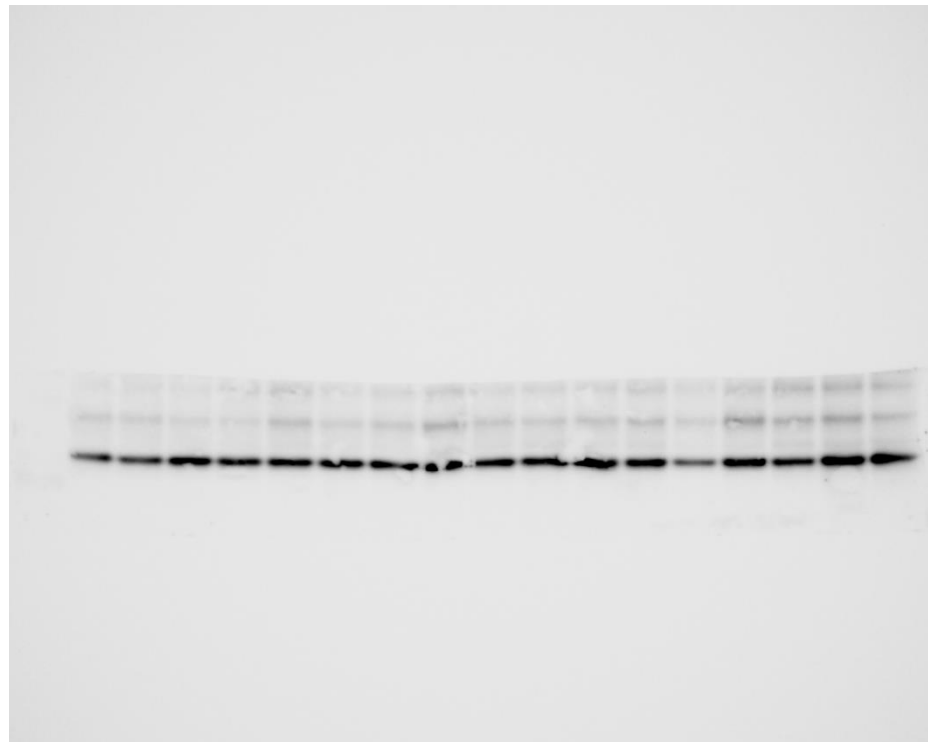

**IL-1 $\beta$  females**

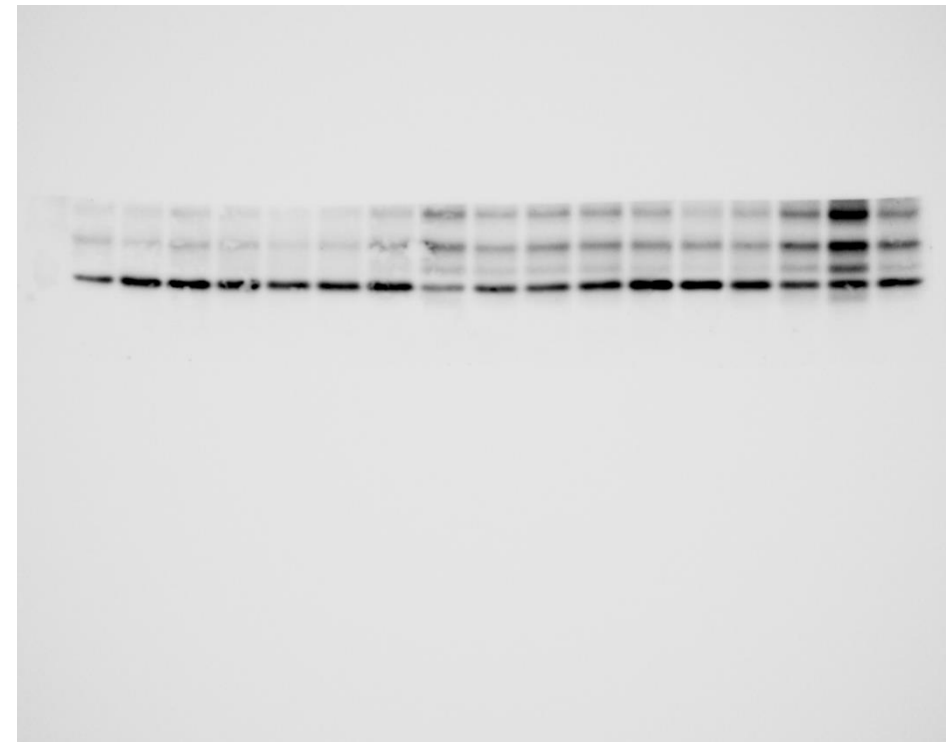

# Figure S5. Unedited blots from Figure 3

**IBA1 males**

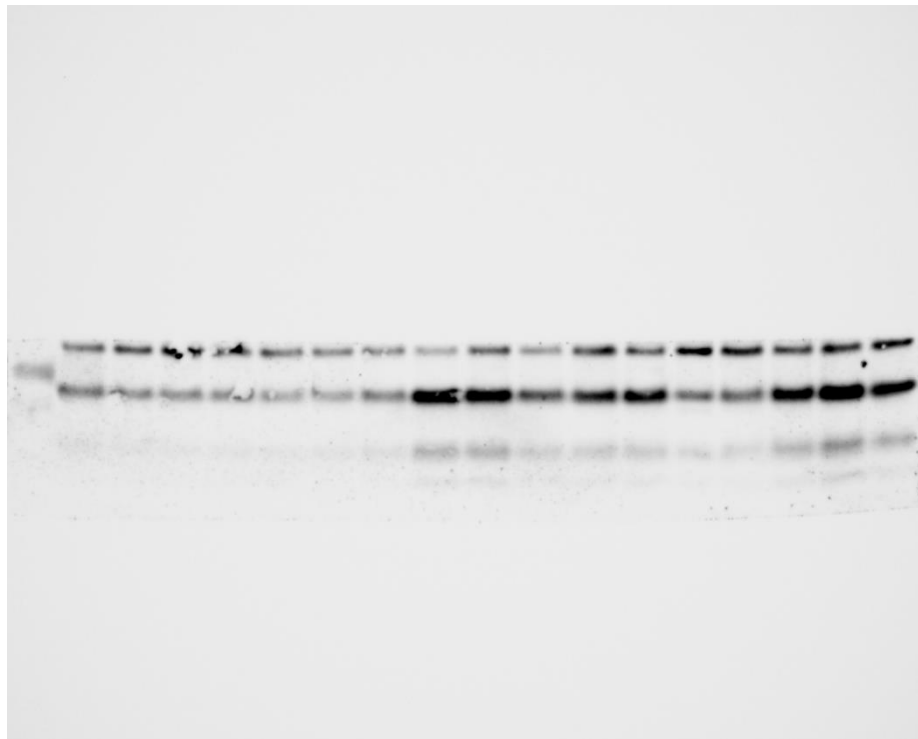

**IBA1 females**

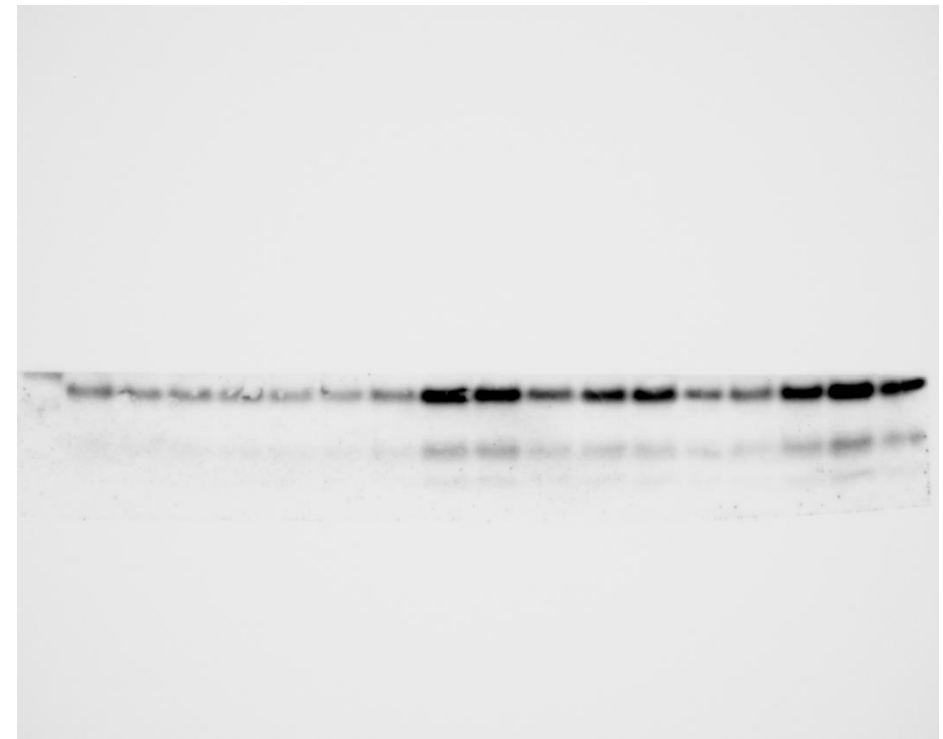

**$\gamma$ -adaptin males**

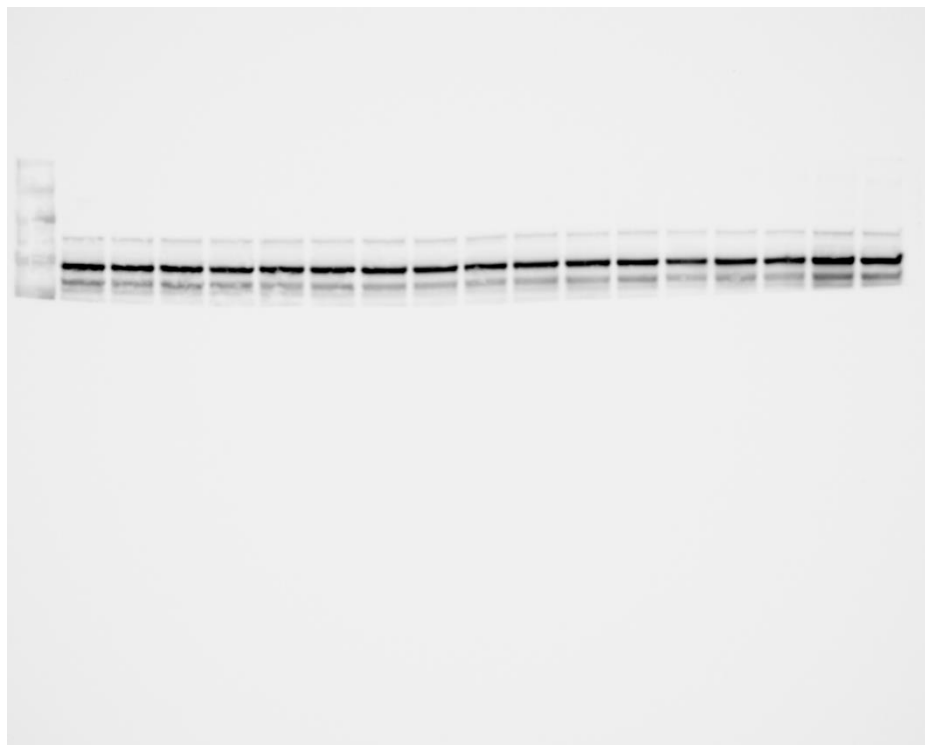

**$\gamma$ -adaptin females**

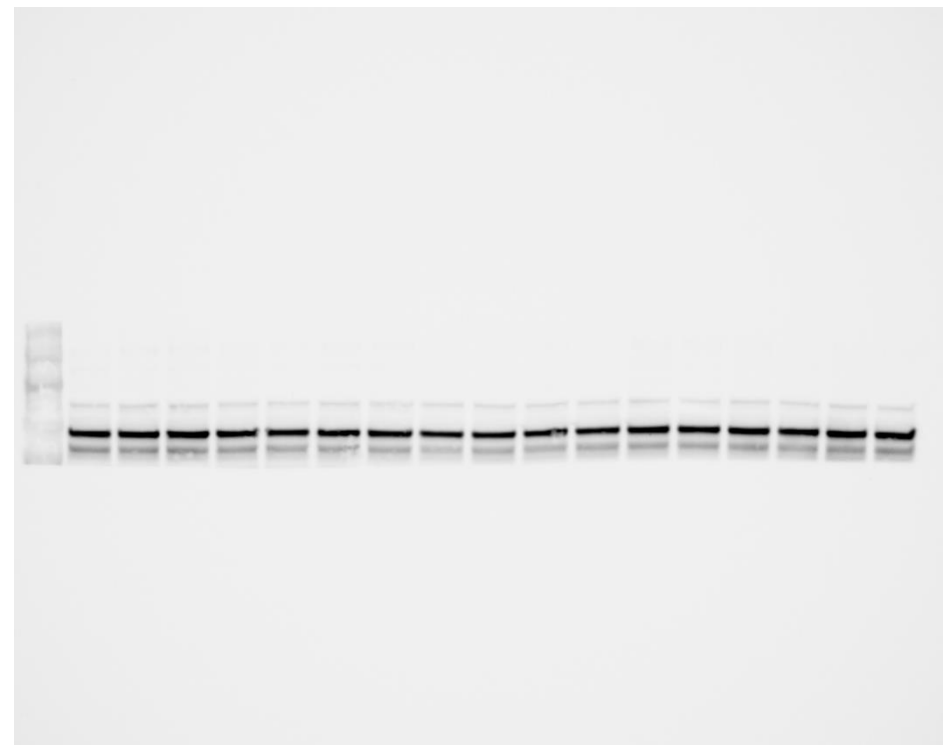

# Figure S5. Unedited blots from Figure 3

**Ponceau staining males**

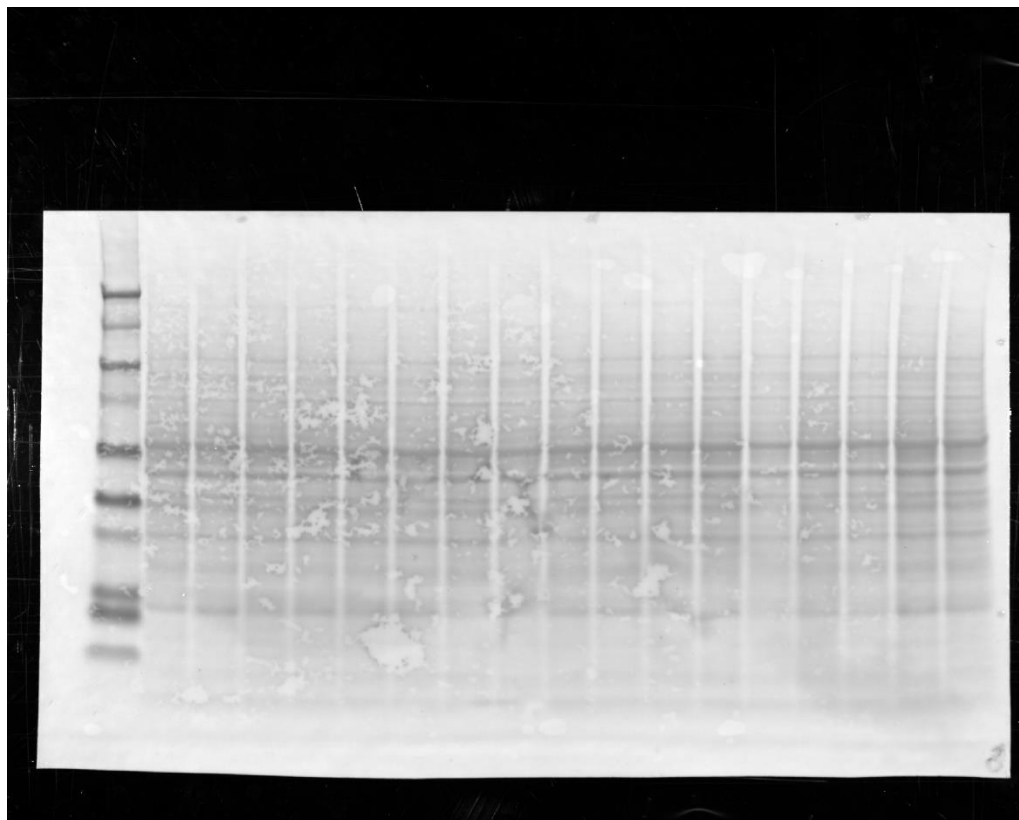

**Ponceau staining females**

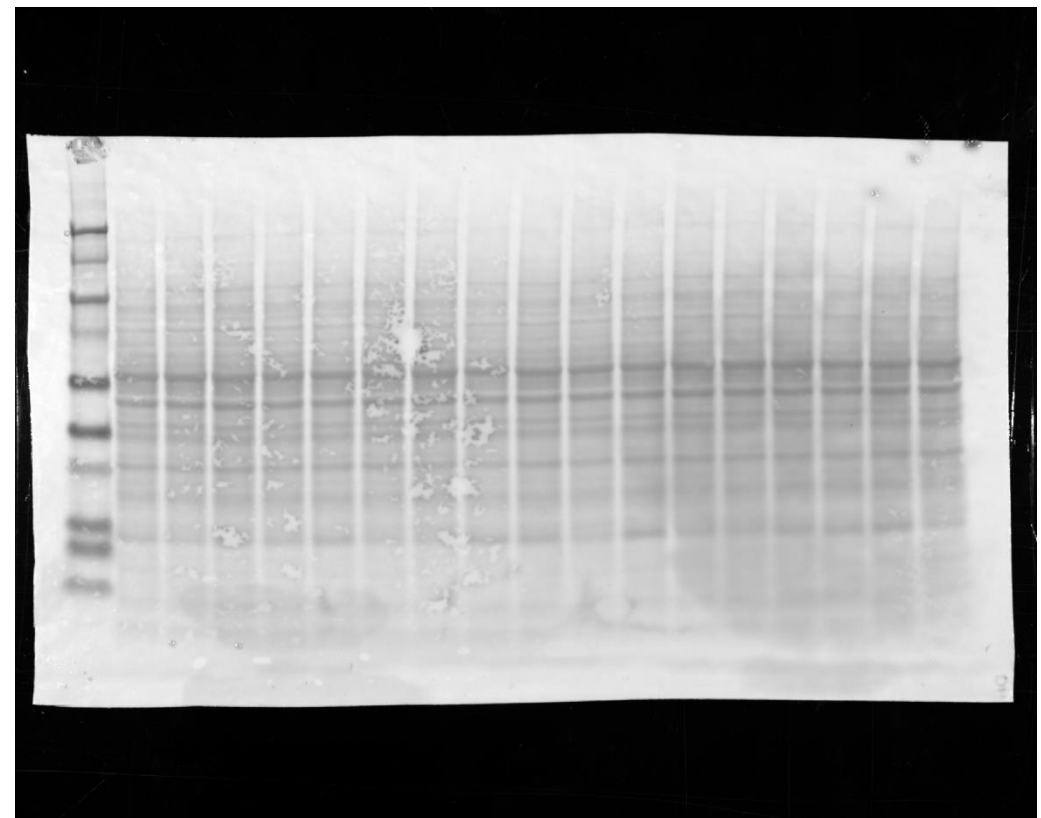

# Figure S5. Unedited blots from Figure 4

**p-IR males**

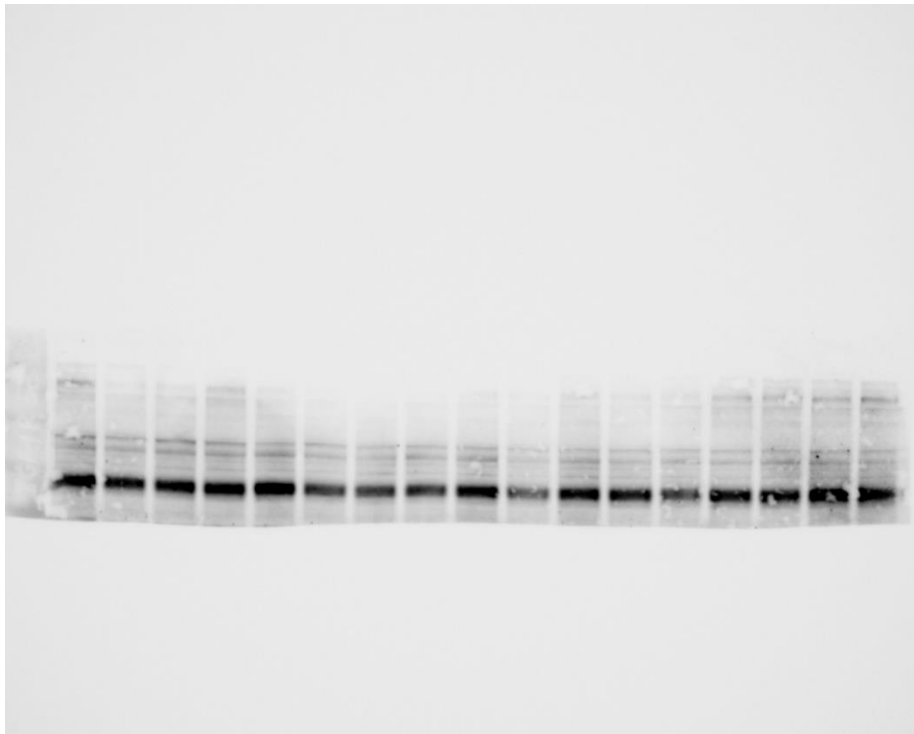

**p-IR females**

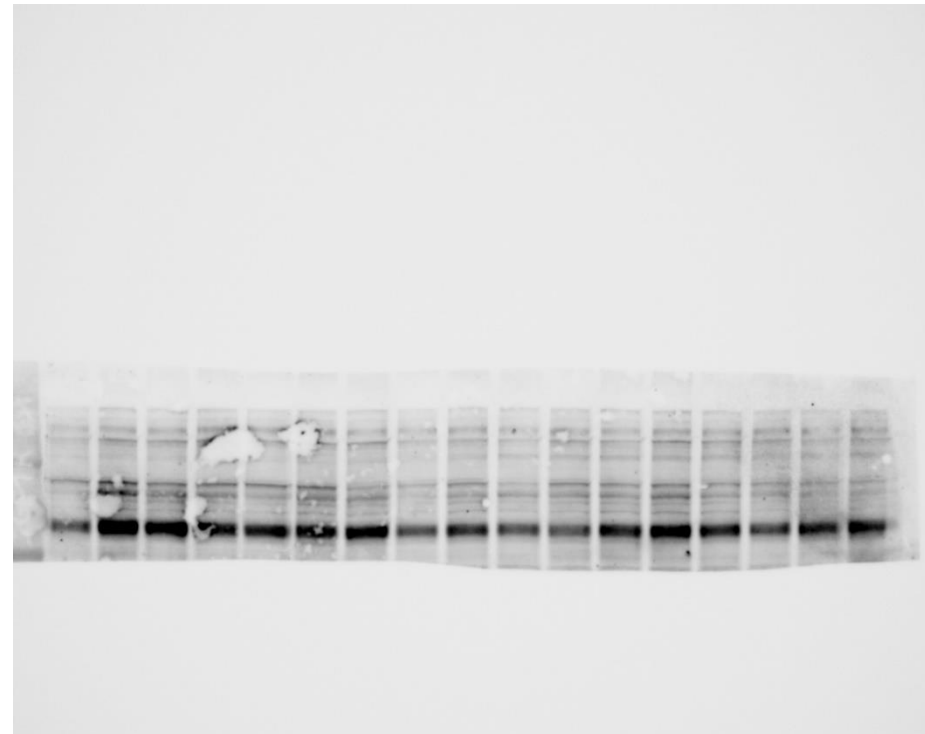

**IR males**

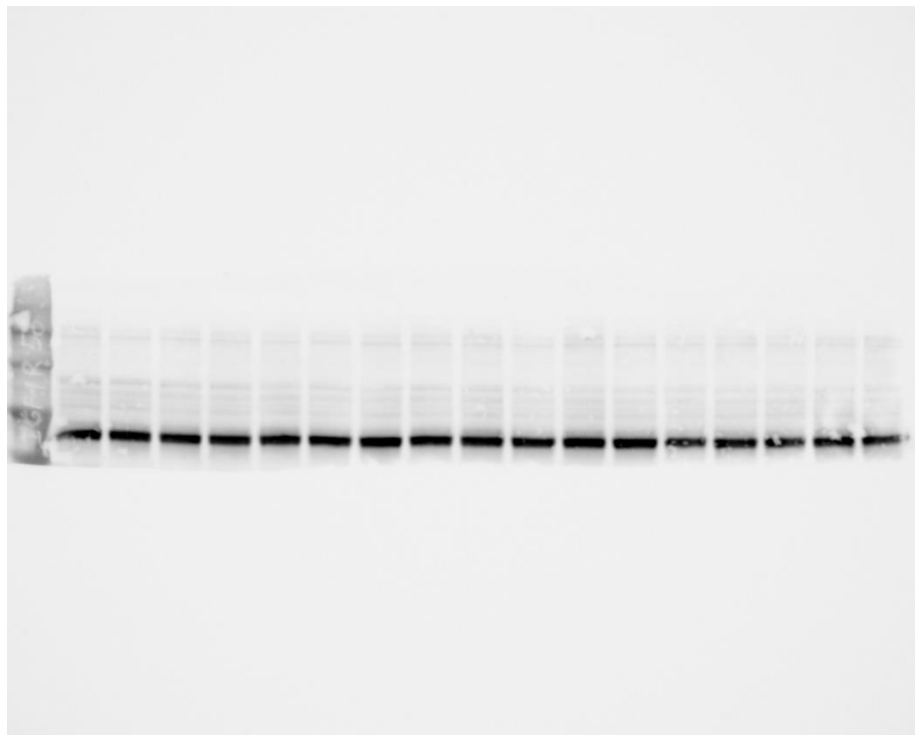

**IR females**

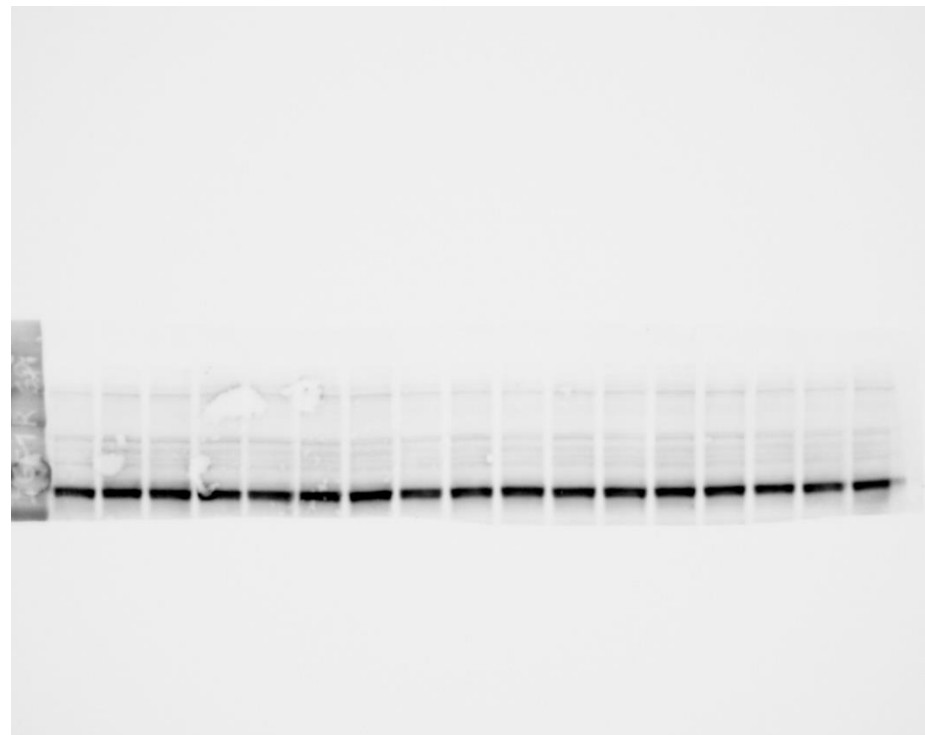



# Figure S5. Unedited blots from Figure 4

**GLP1R males**

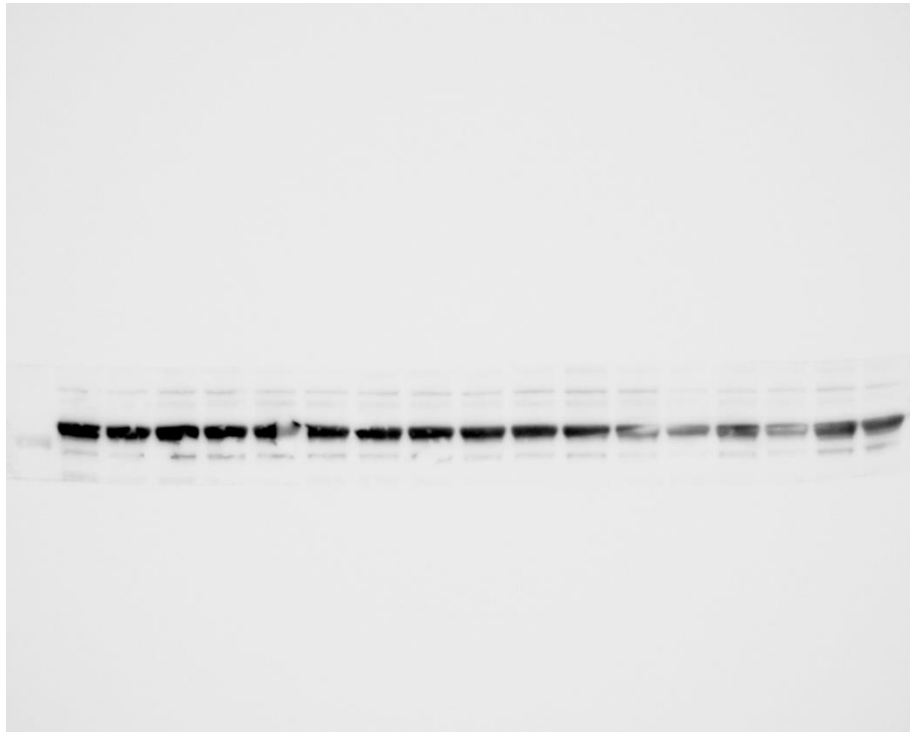

**GLP1R females**

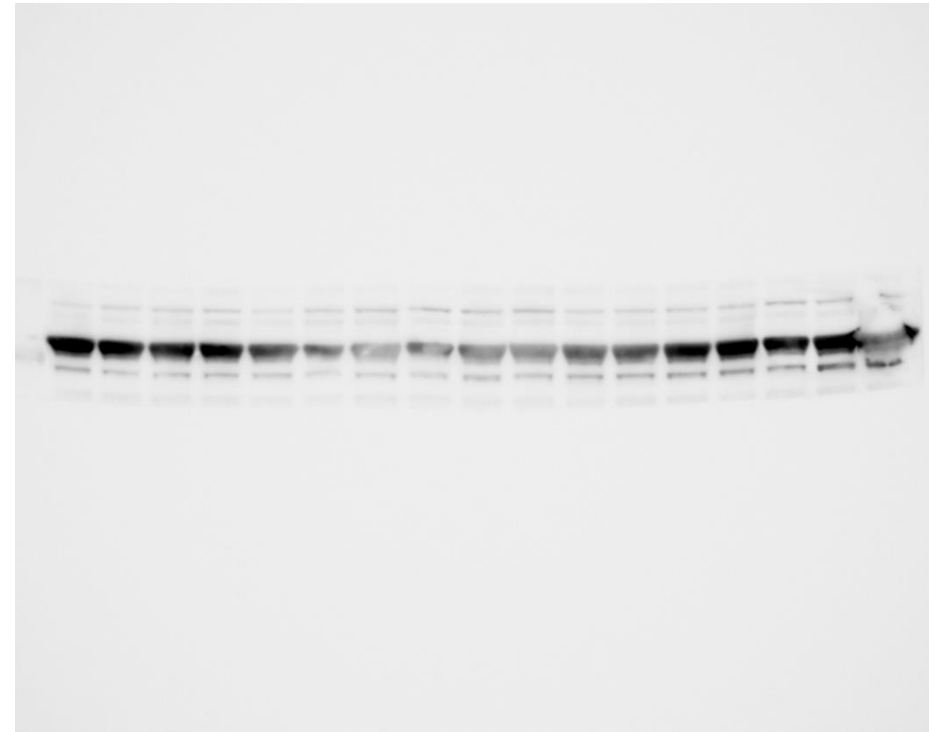

**GHSR males**

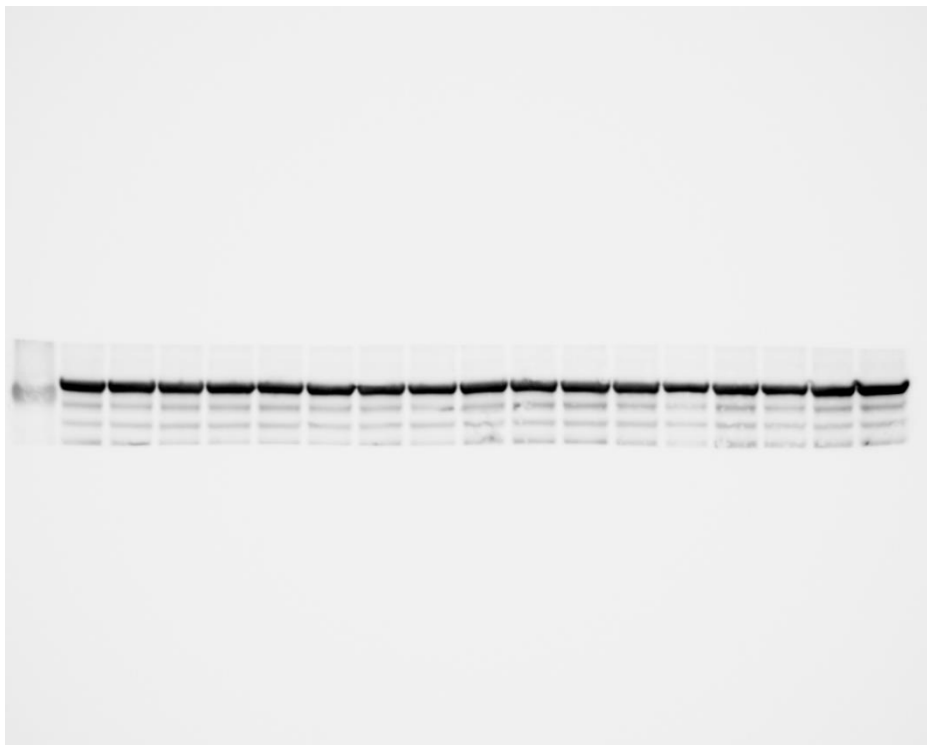

**GHSR females**

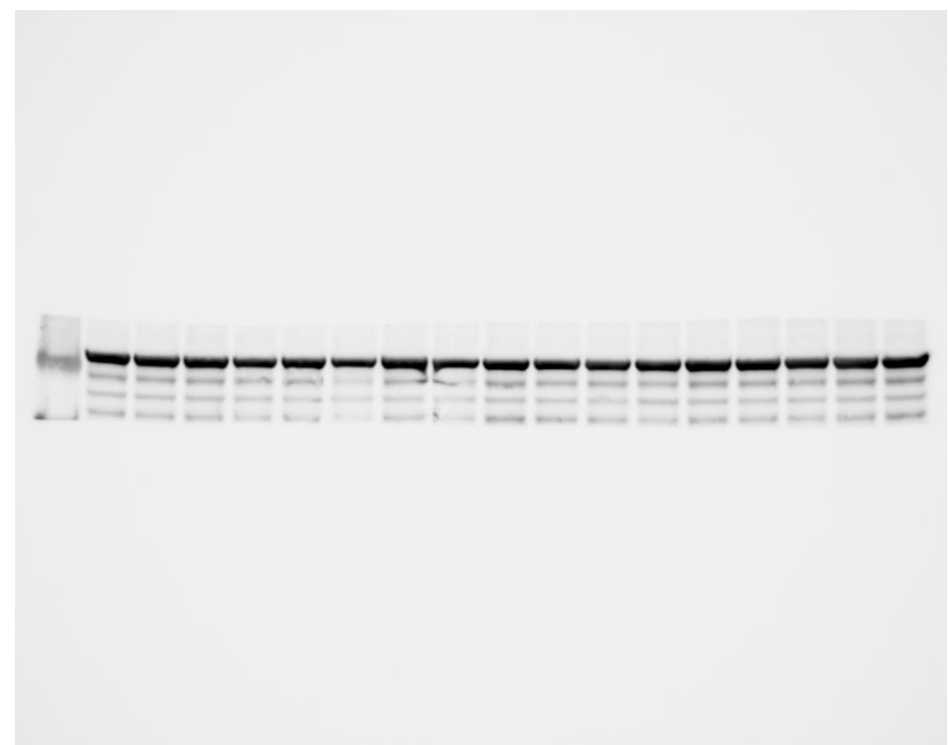

# Figure S5. Unedited blots from Figure 4

**$\gamma$ -adaptin males**

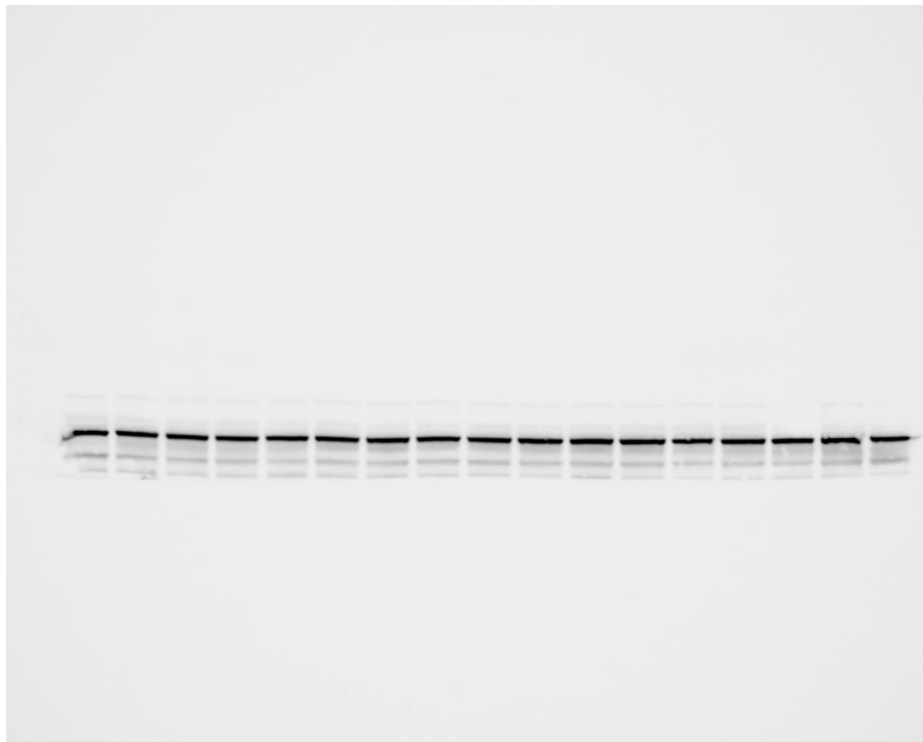

**$\gamma$ -adaptin females**

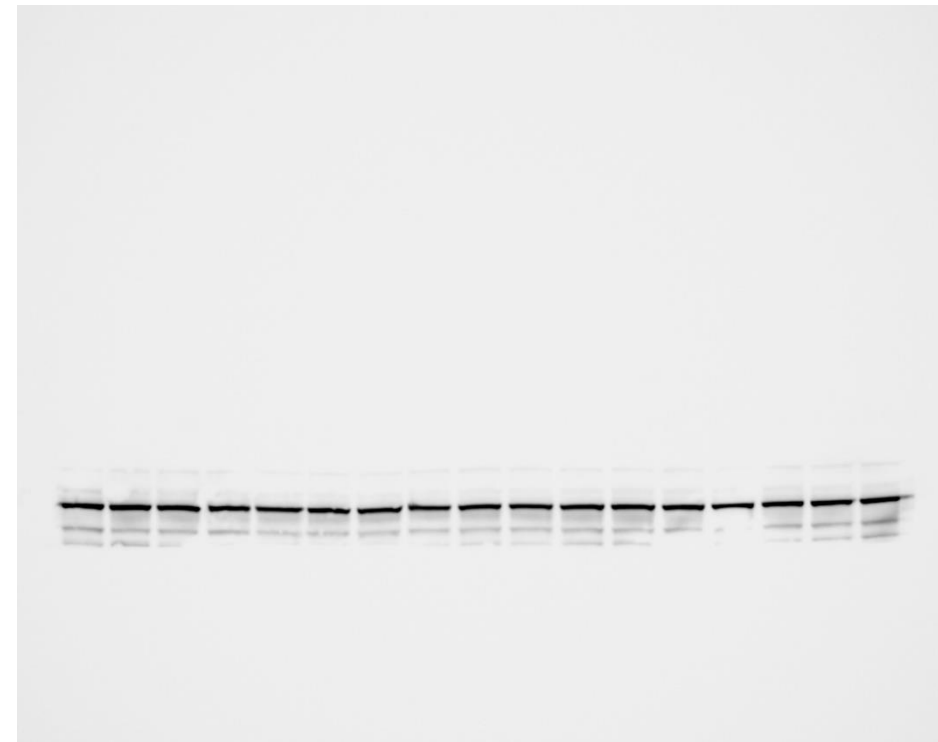

**Ponceau staining males**

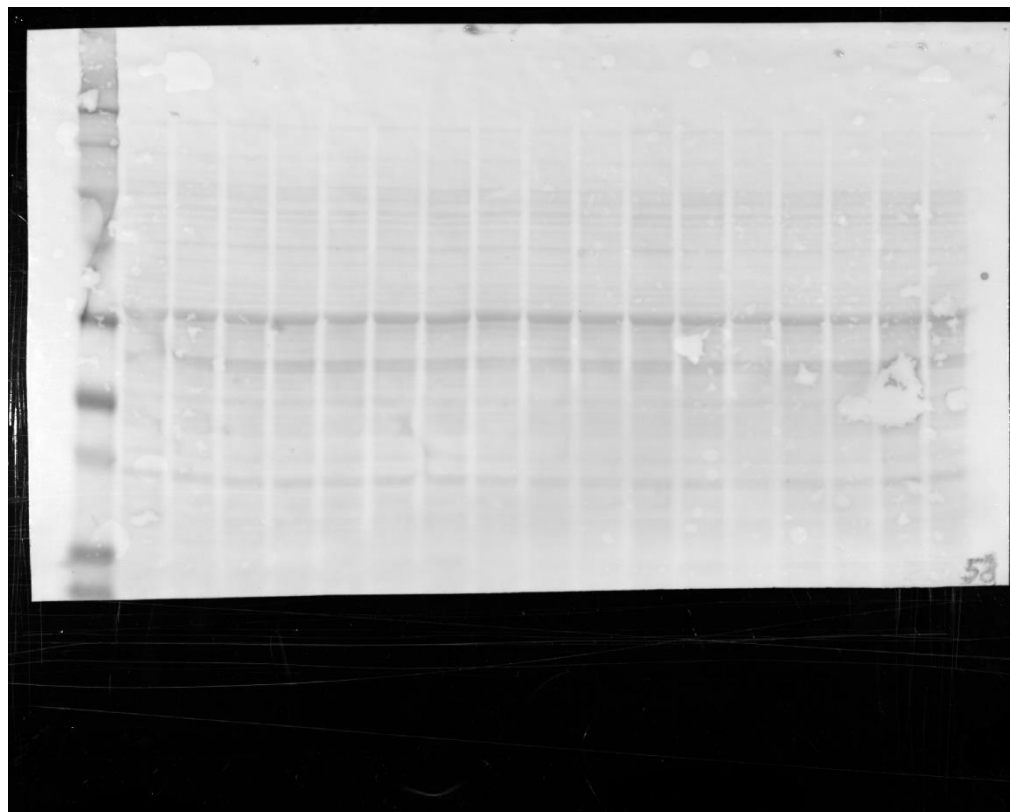

**Ponceau staining females**

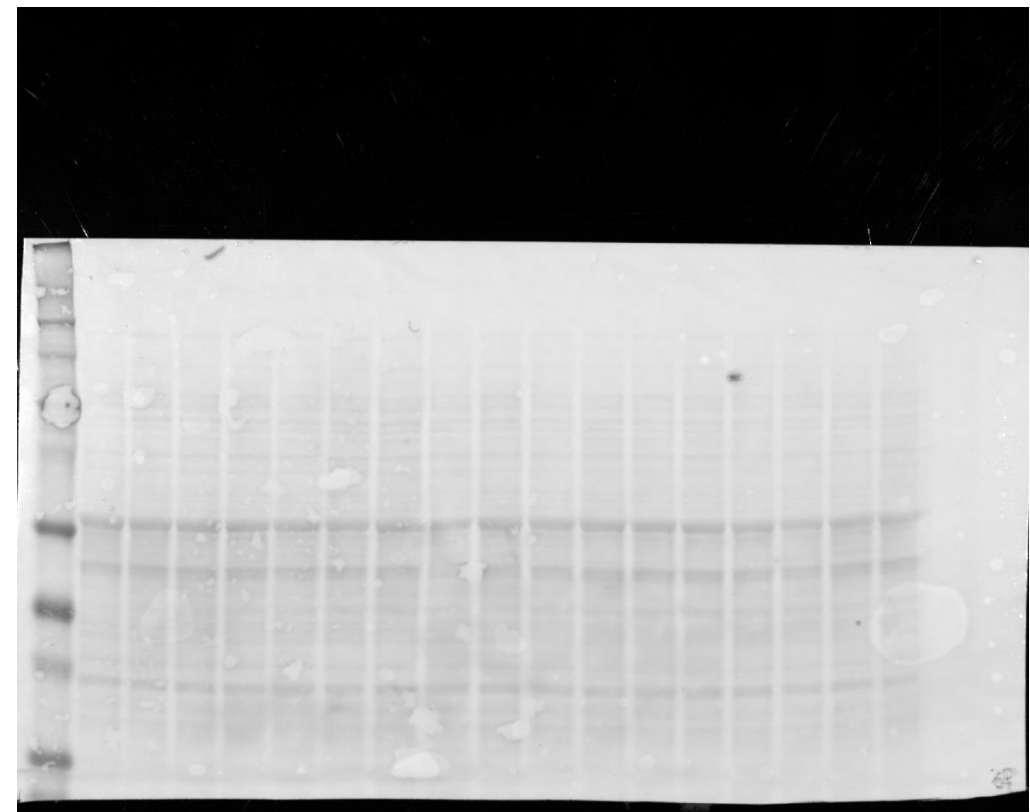

# Figure S5. Unedited blots from Figure 5

**TLR4 males**

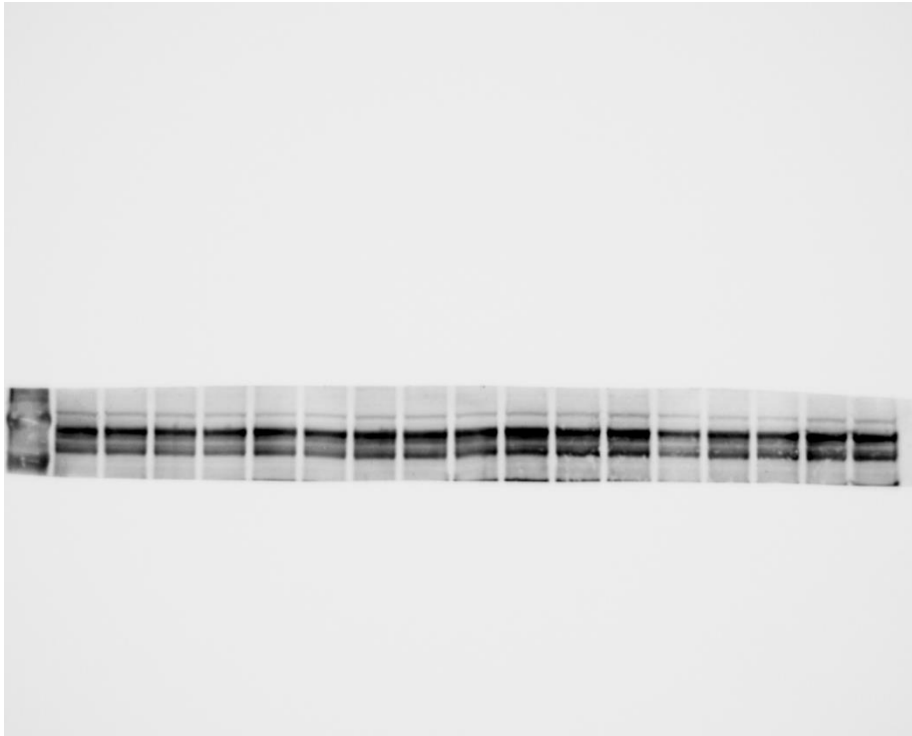

**TLR4 females**

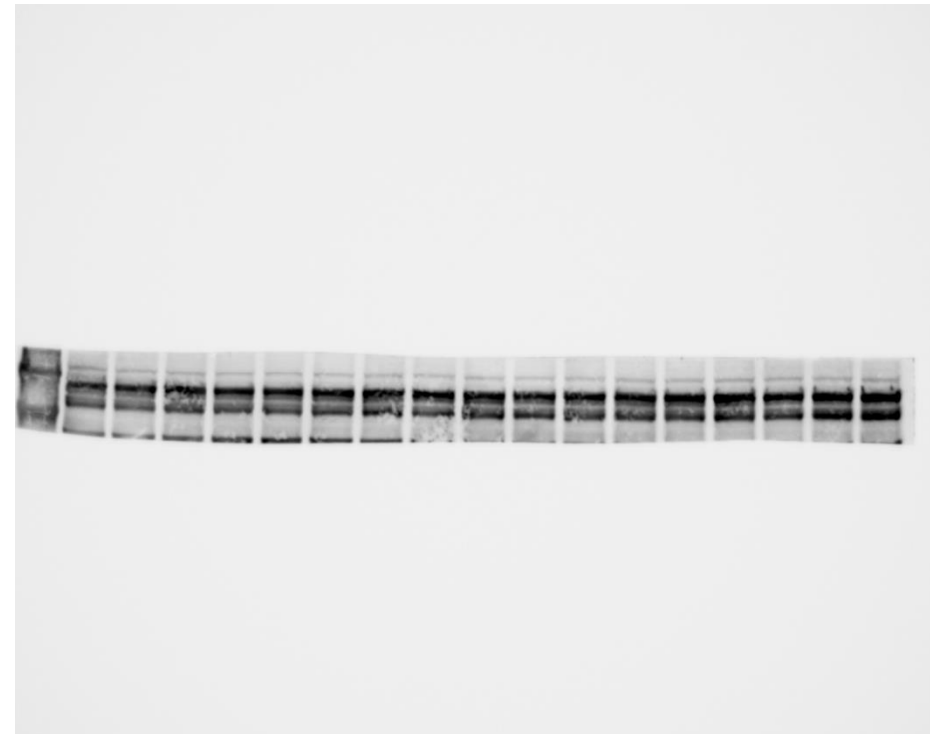

**p-LEPR males**

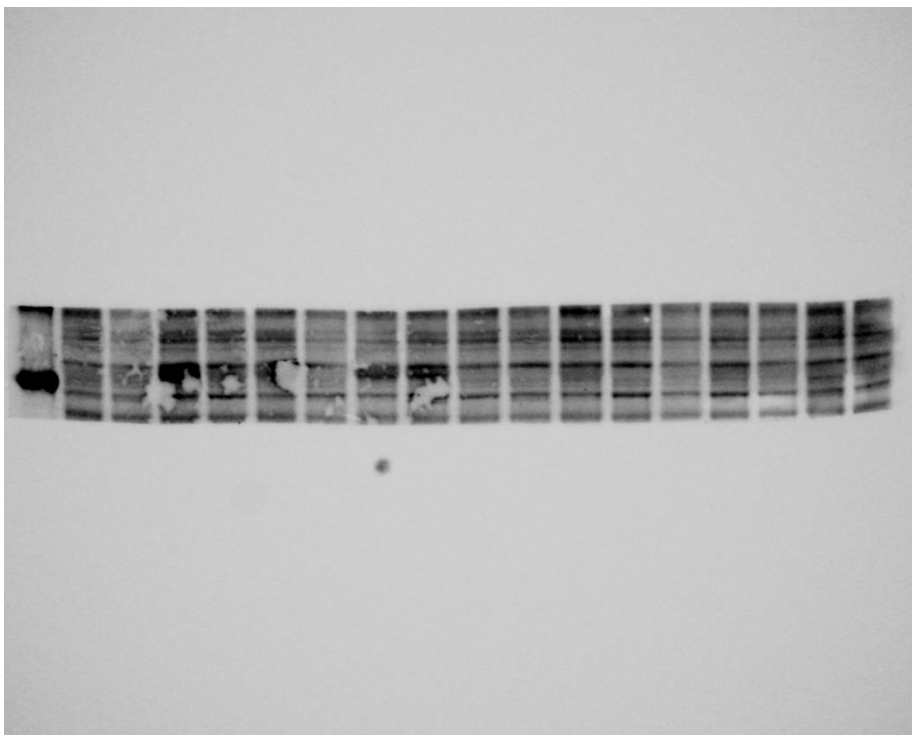

**p-LEPR females**

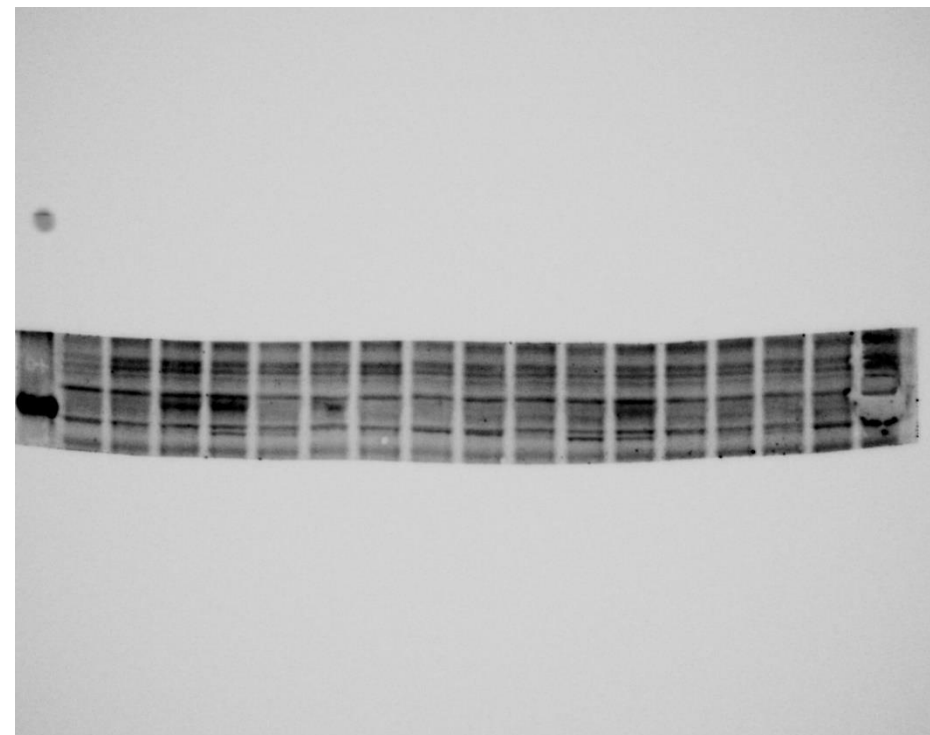

# Figure S5. Unedited blots from Figure 5

**LepR machos**

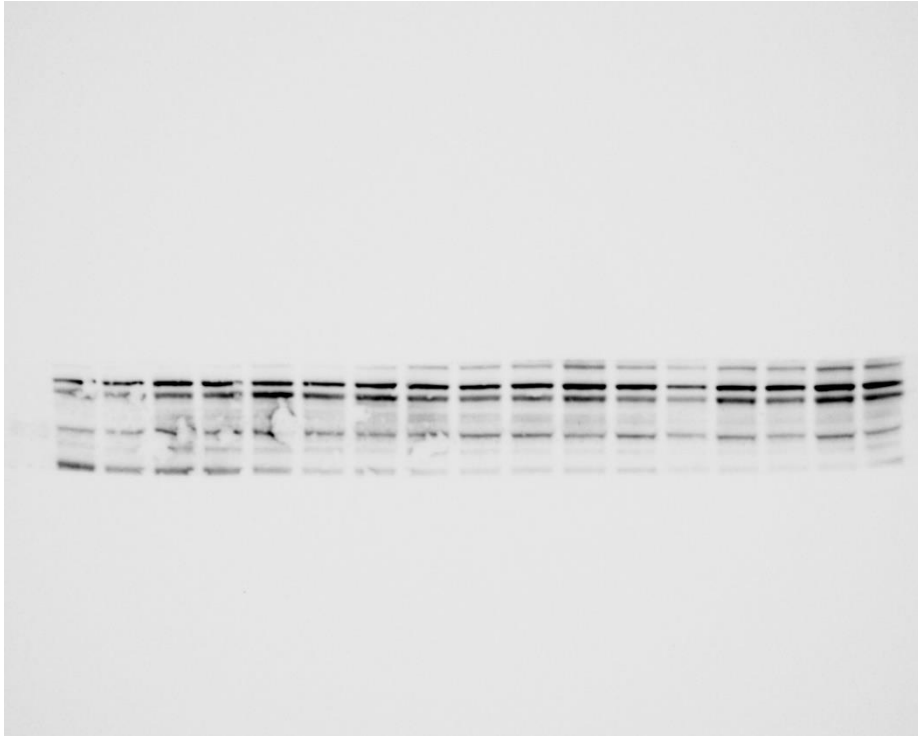

**LepR hembras**

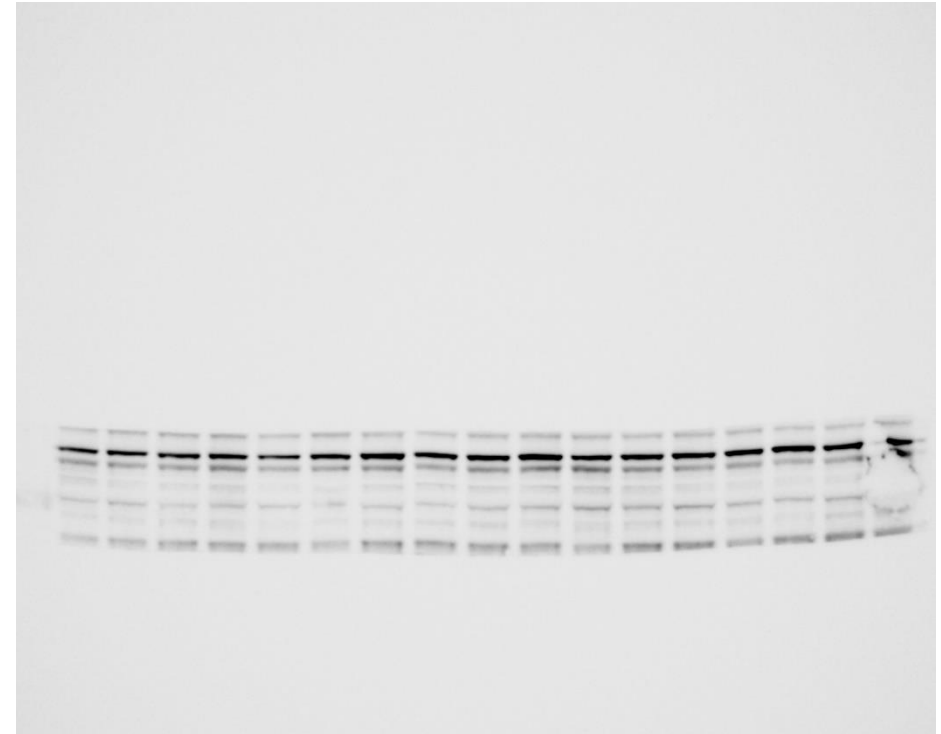

**$\gamma$ -adaptin males**

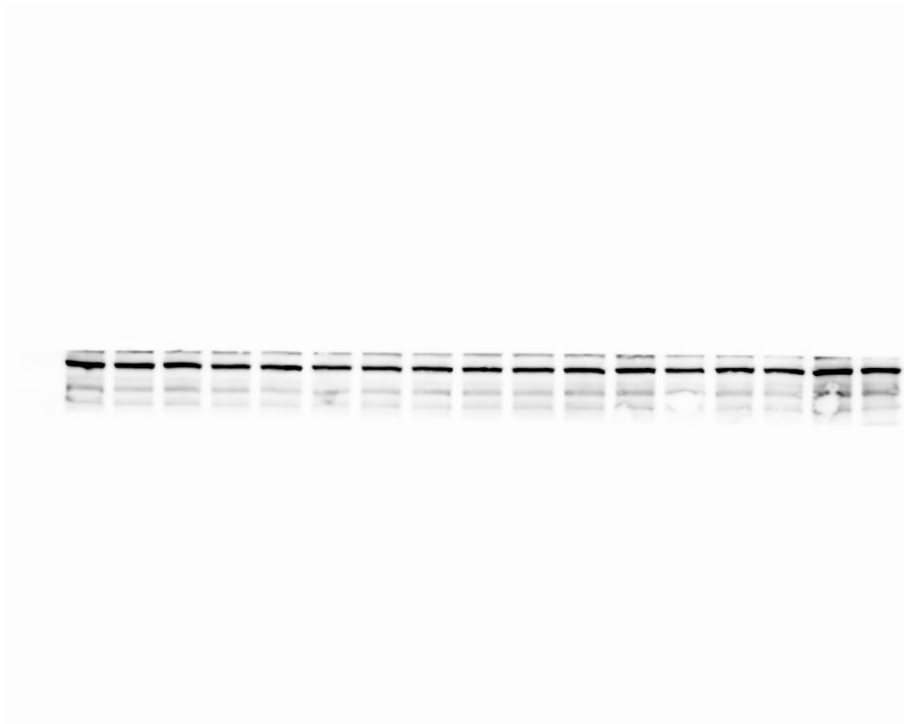

**$\gamma$ -adaptin females**

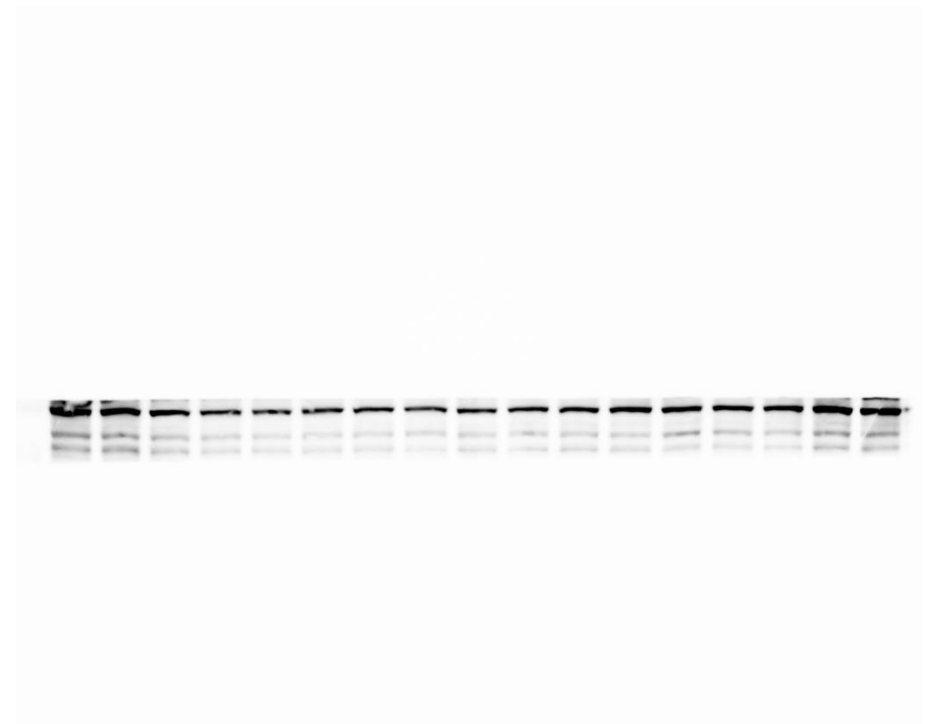

# Figure S5. Unedited blots from Figure 5

**Ponceau staining males**

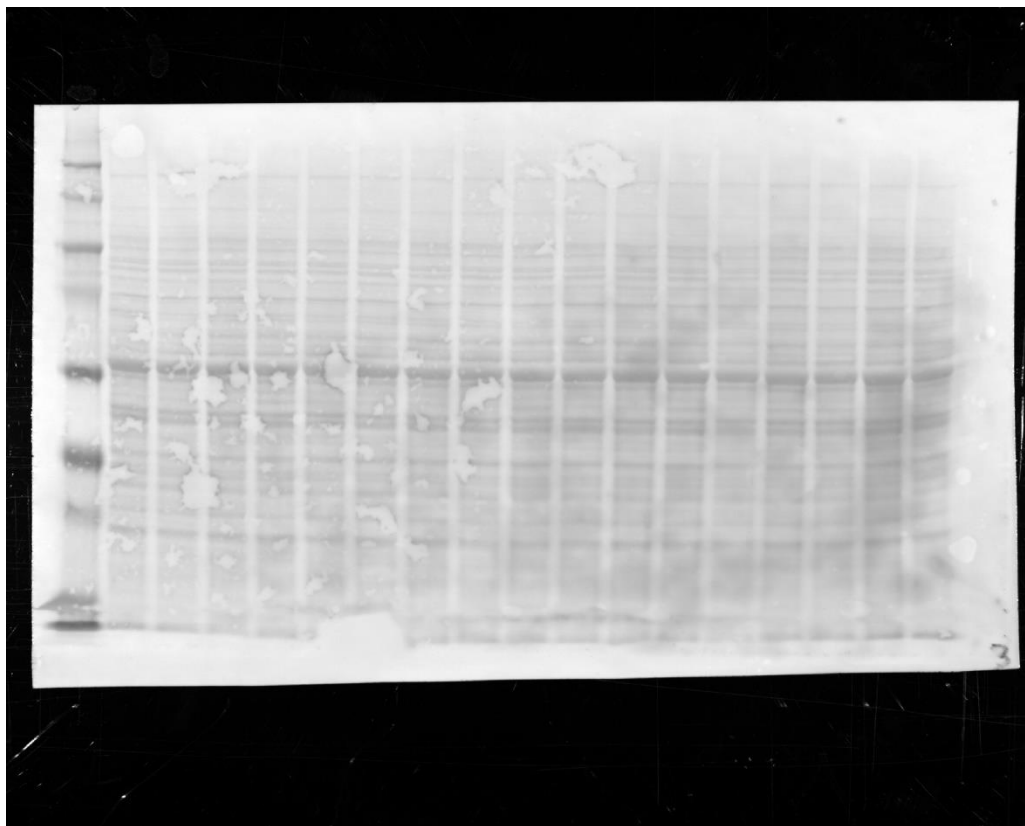

**Ponceau staining females**

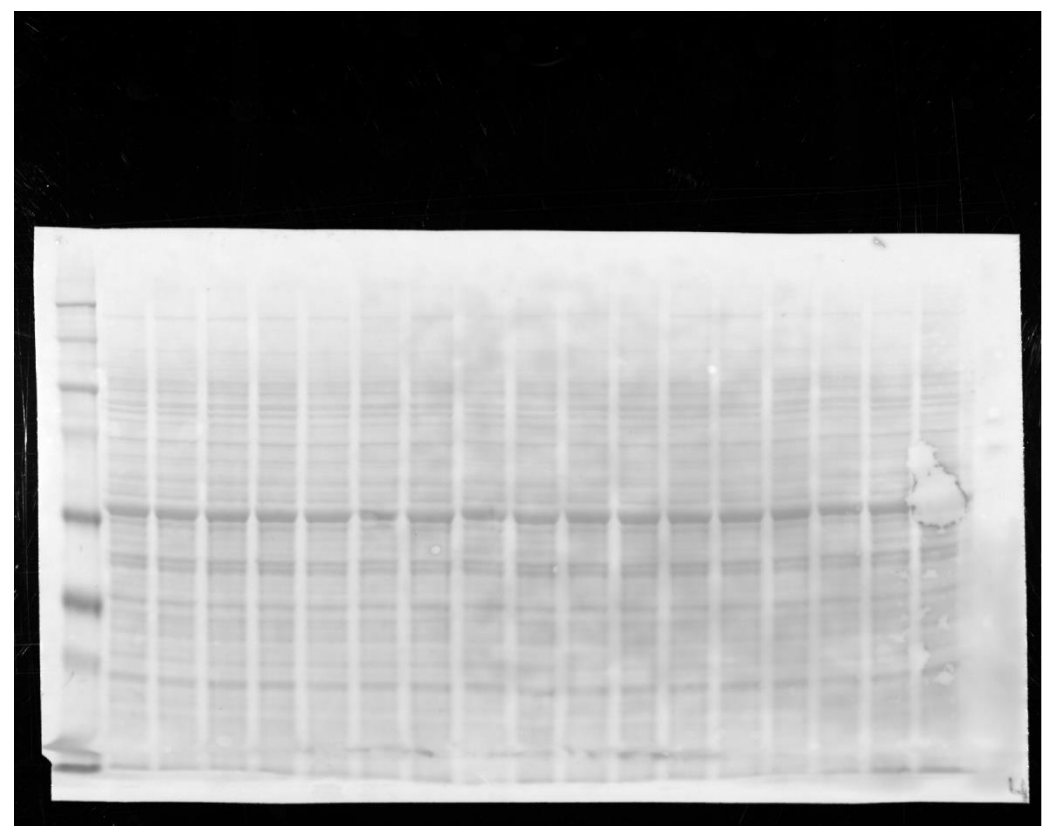

# Figure S5. Unedited blots from Figure 6

**IRS1 p(Ser612) males**

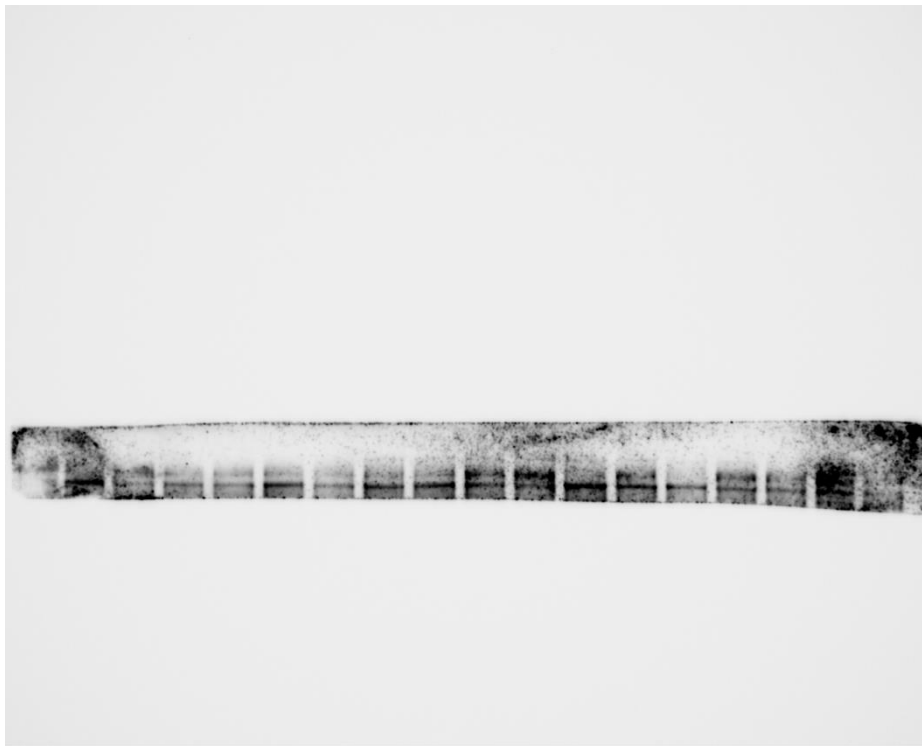

**IRS1 p(Ser612) females**

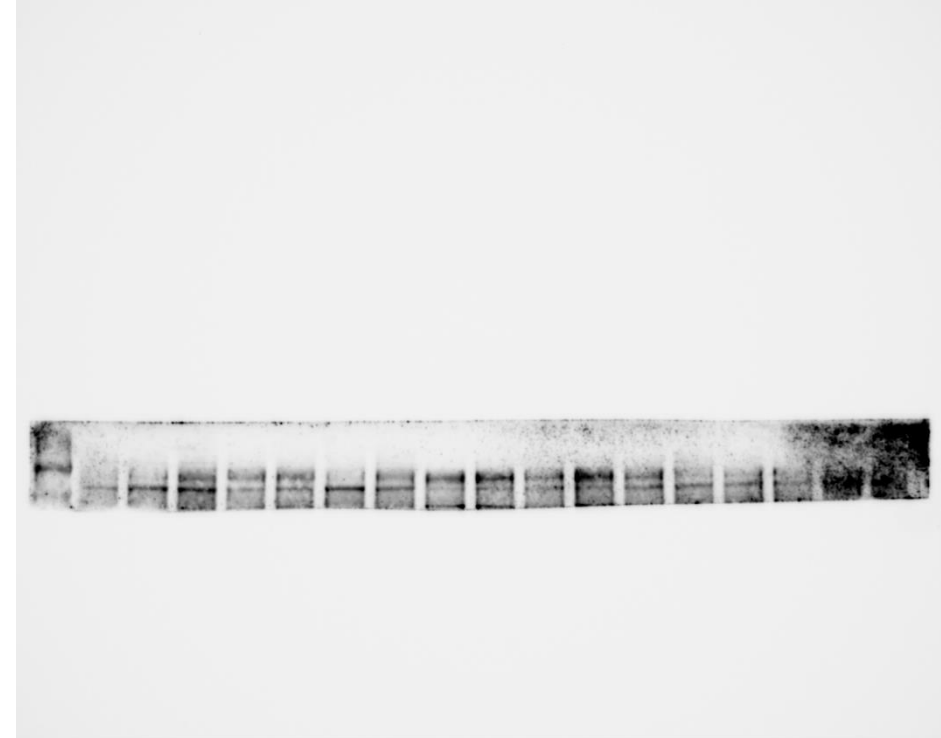

**IRS1 p(Tyr892) males**

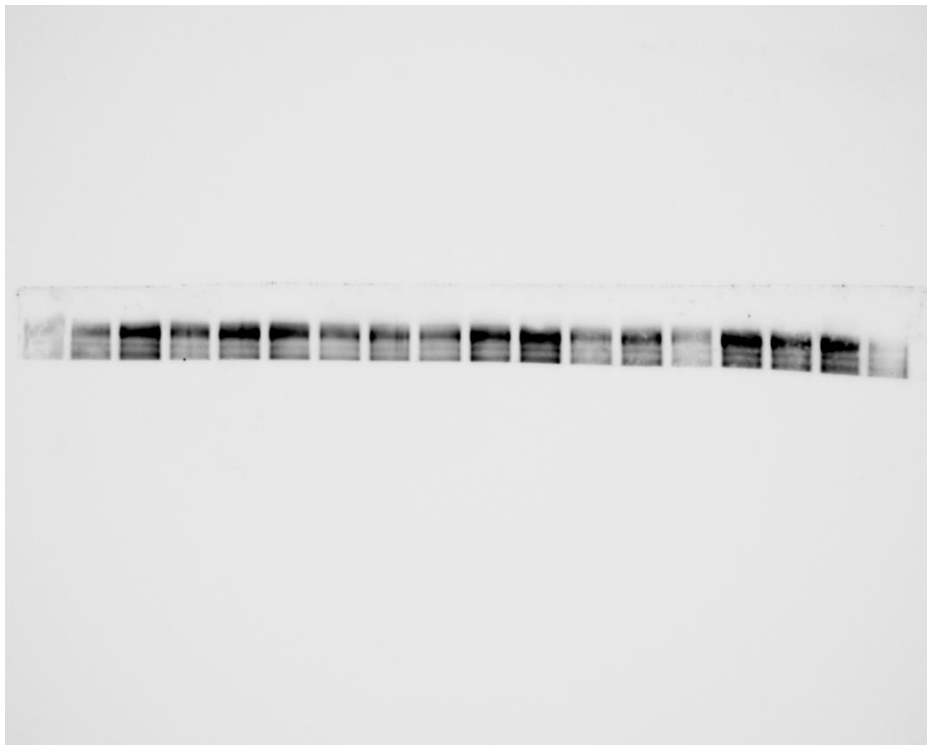

**IRS1 p(Tyr892) females**

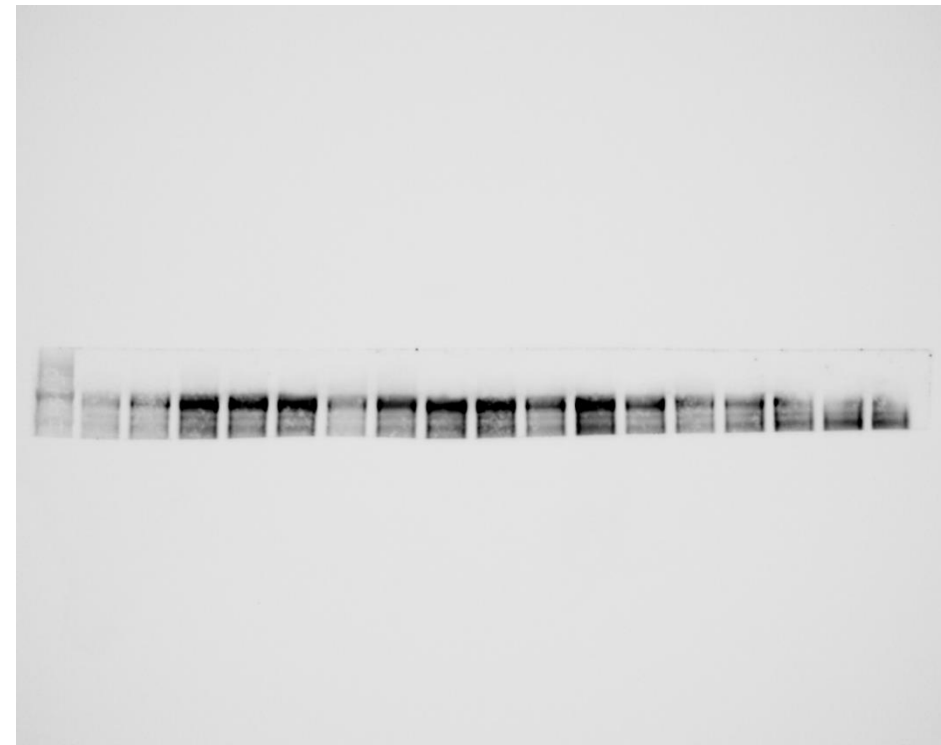

# Figure S5. Unedited blots from Figure 6

**IRS1 males**

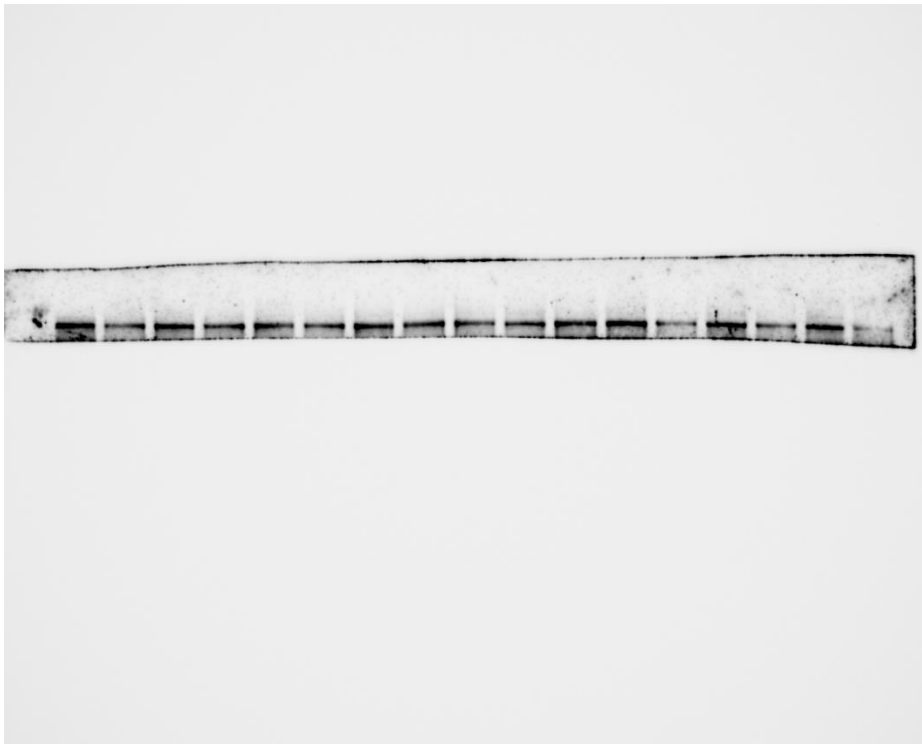

**IRS1 females**

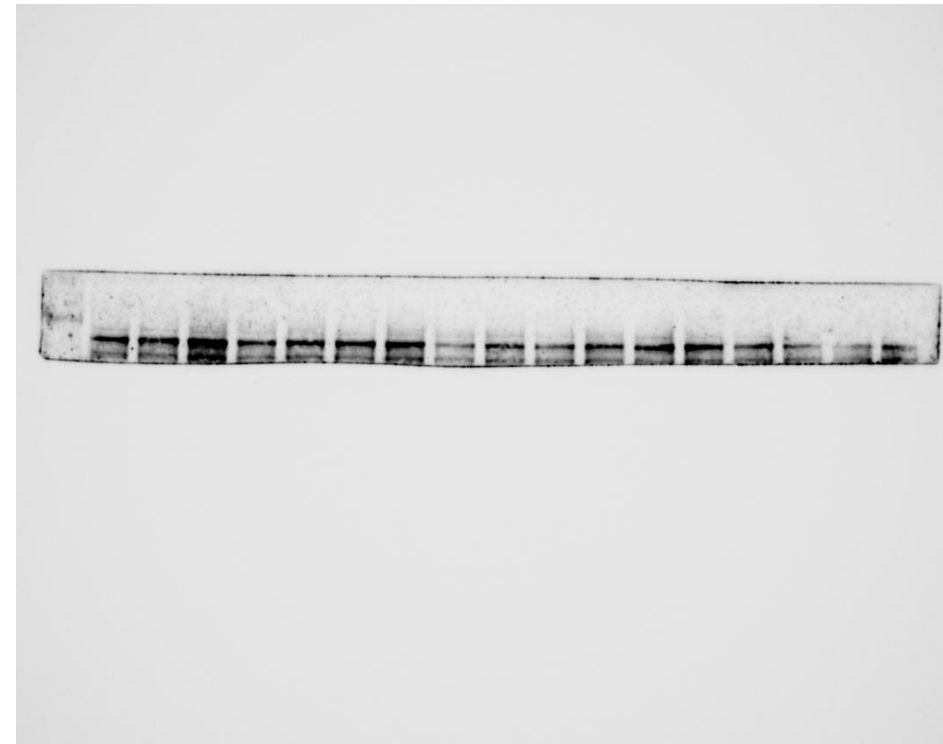

**p-STAT5 males**

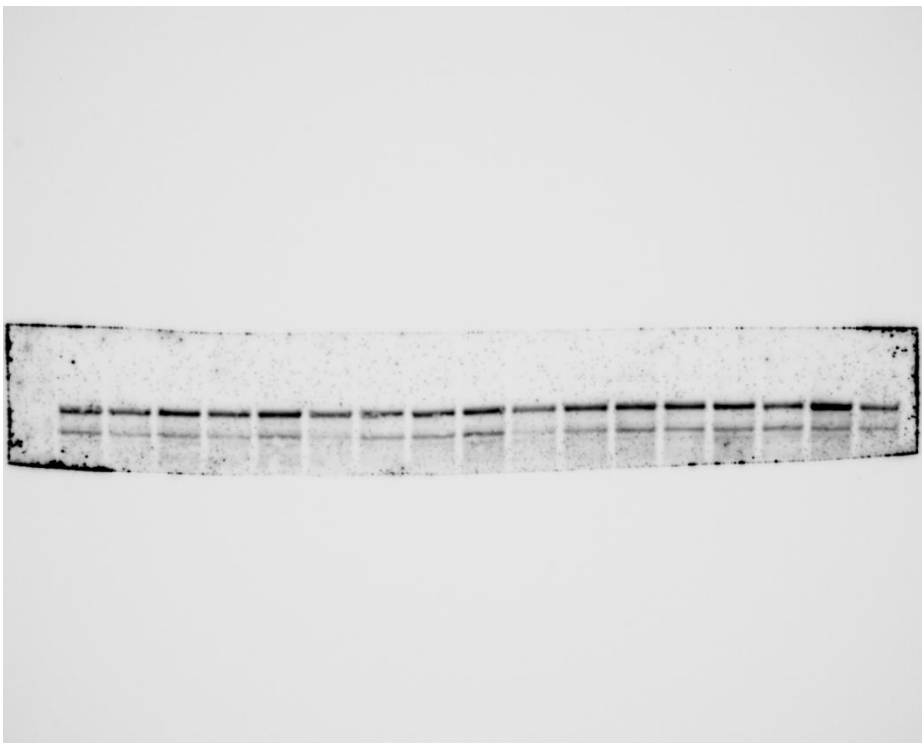

**p-STAT5 females**

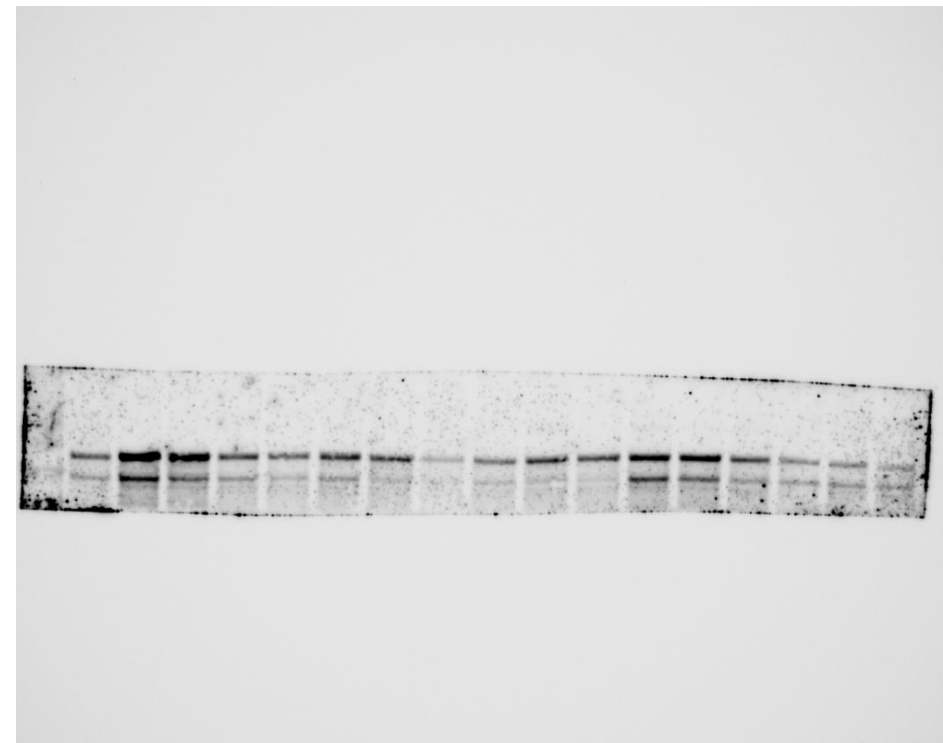

# Figure S5. Unedited blots from Figure 6

**STAT5 males**

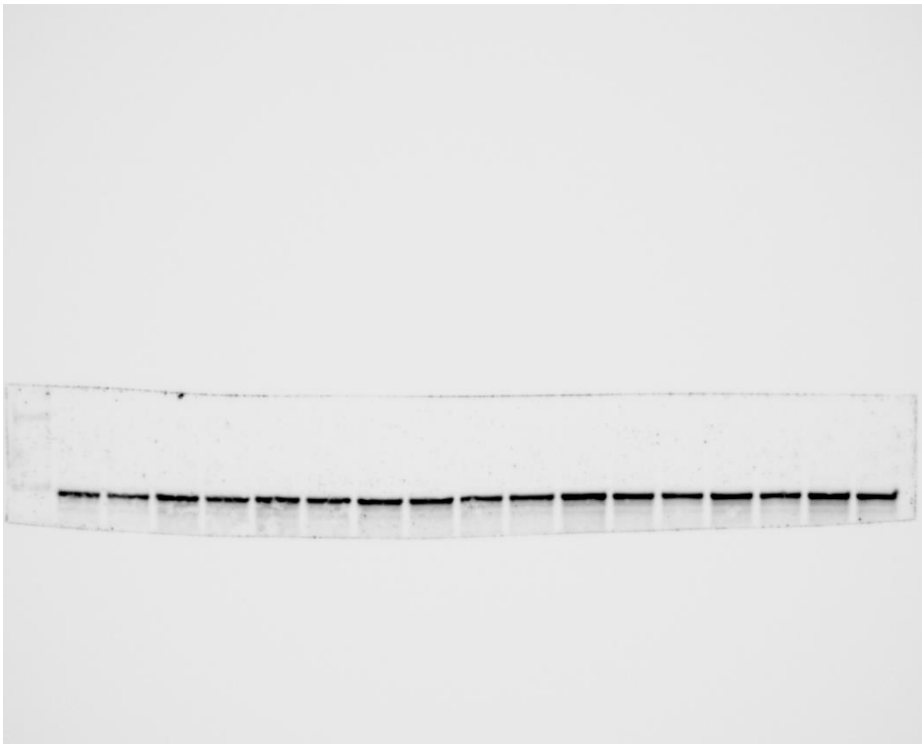

**STAT5 females**

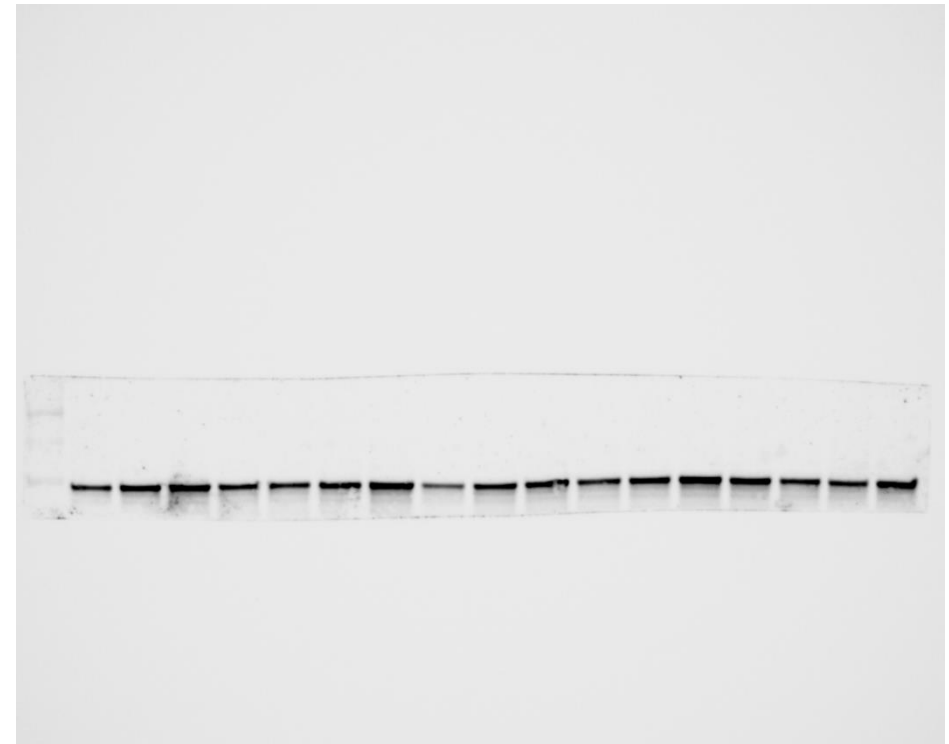

**p-STAT3 males**

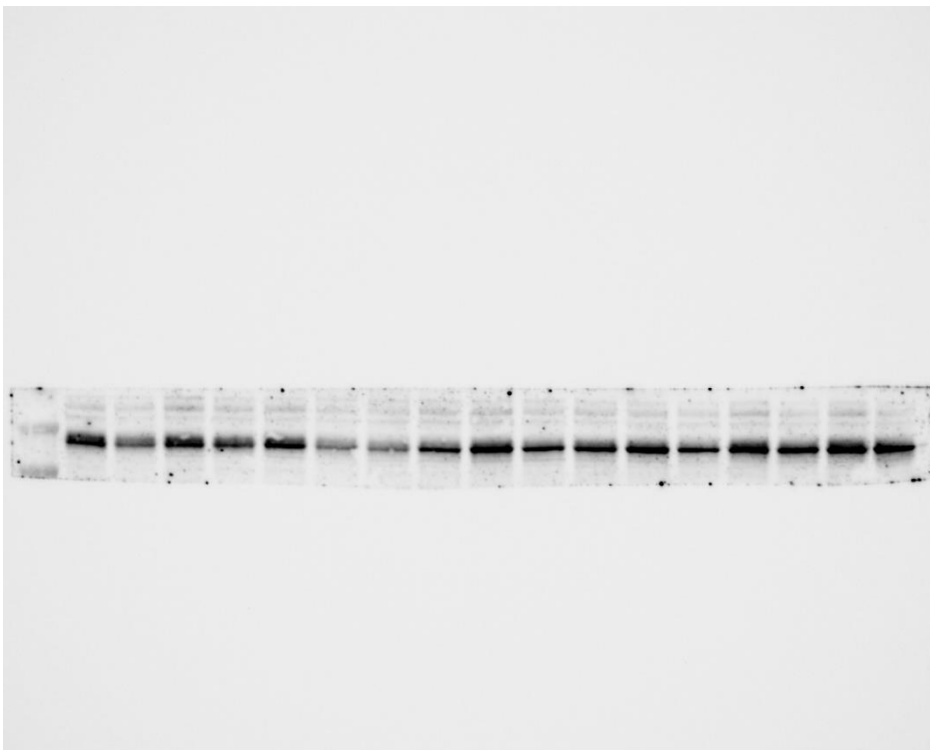

**p-STAT3 females**

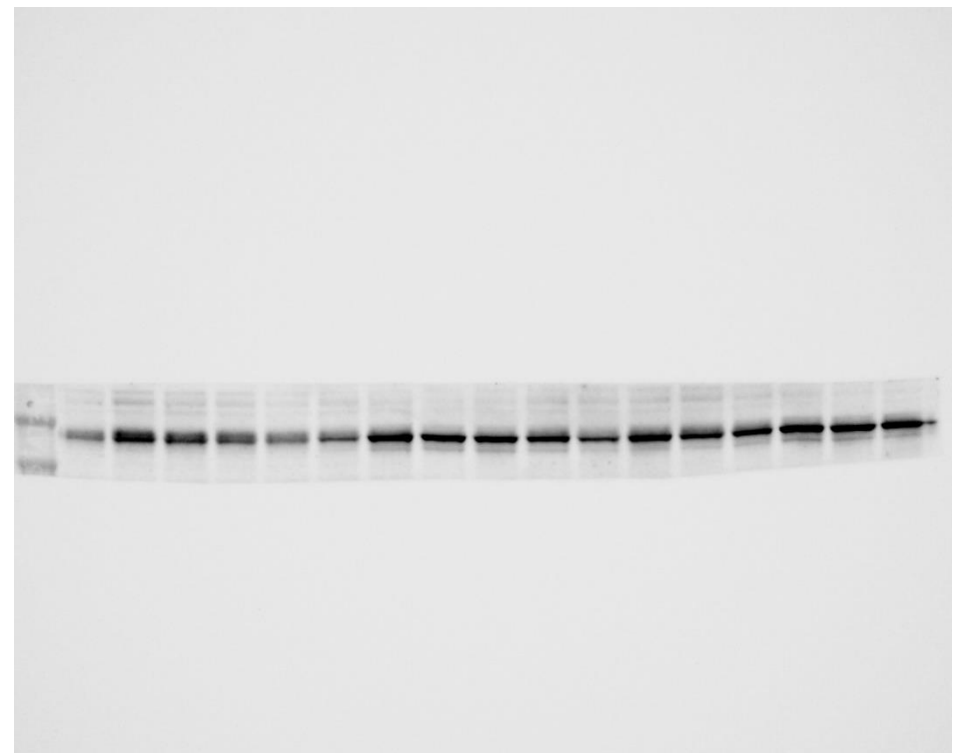



# Figure S5. Unedited blots from Figure 6

**STAT3 males**

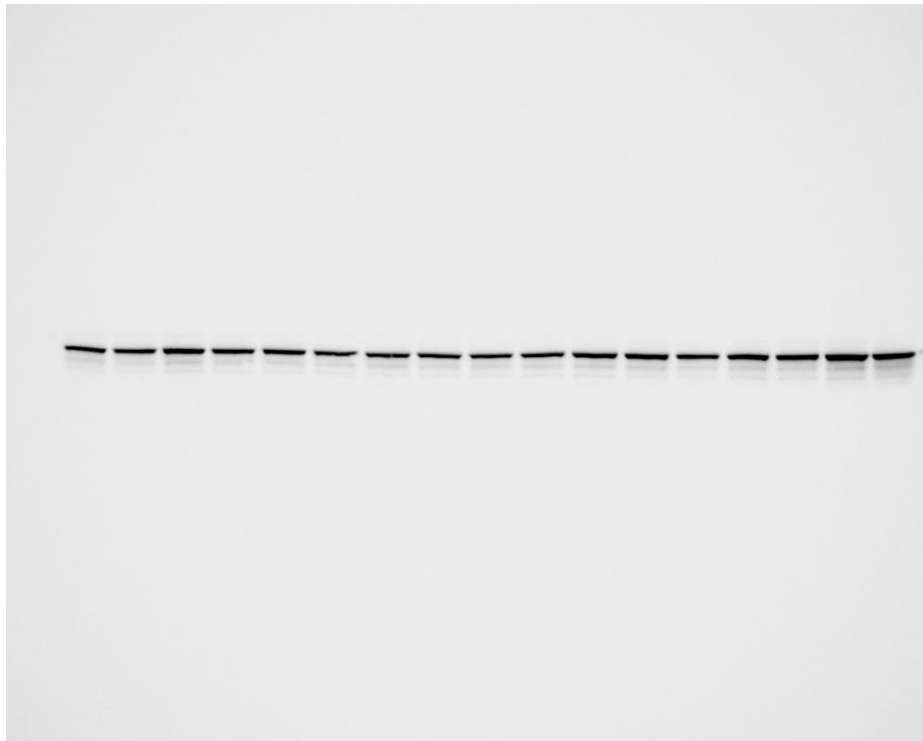

**STAT3 females**

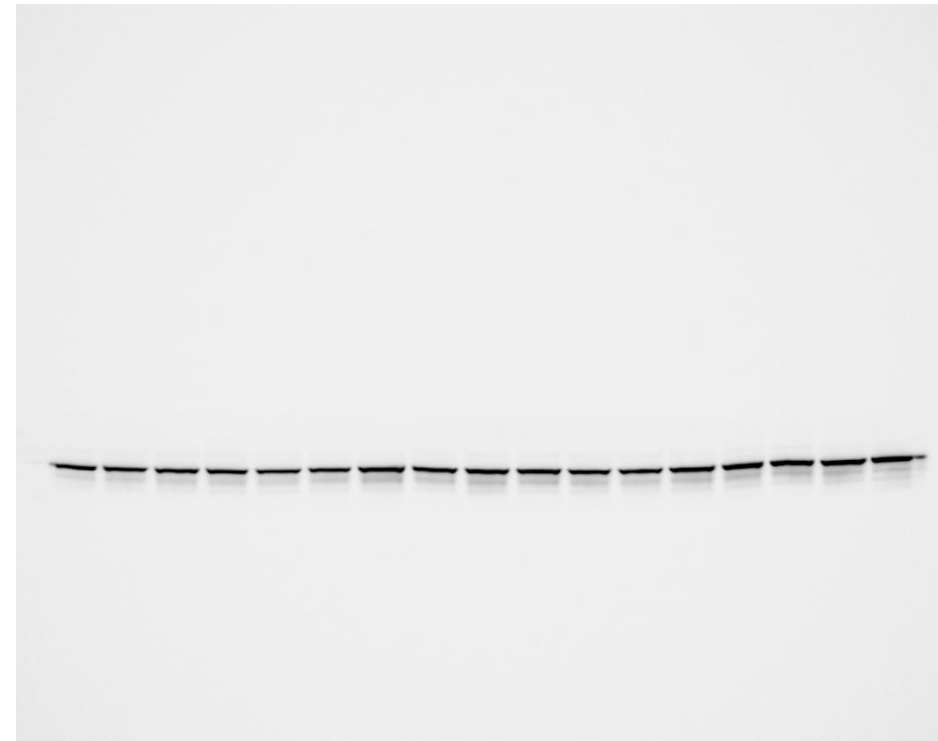

**$\gamma$ -adaptin males**

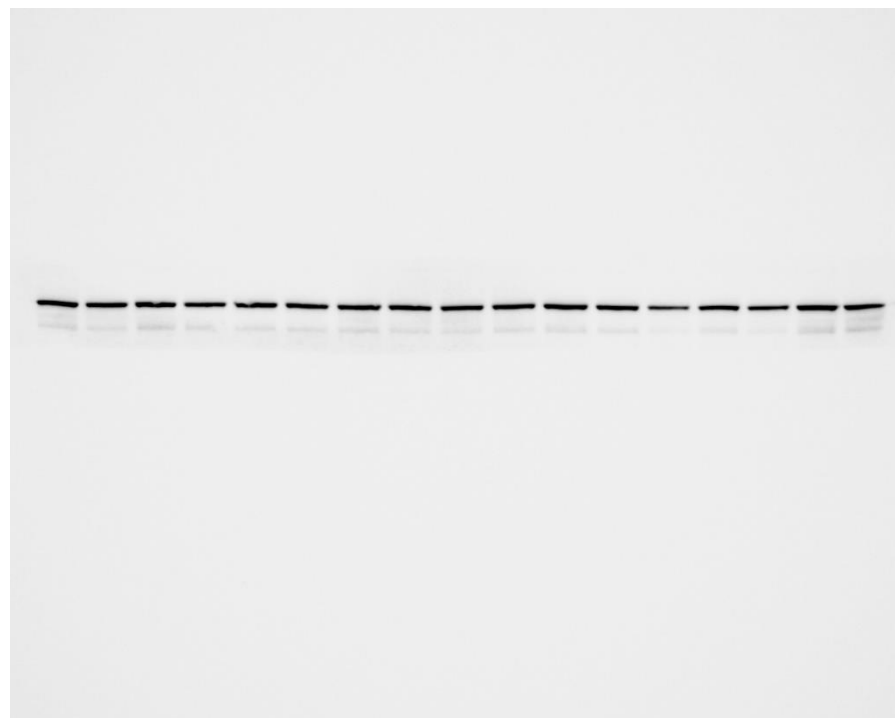

**$\gamma$ -adaptin females**

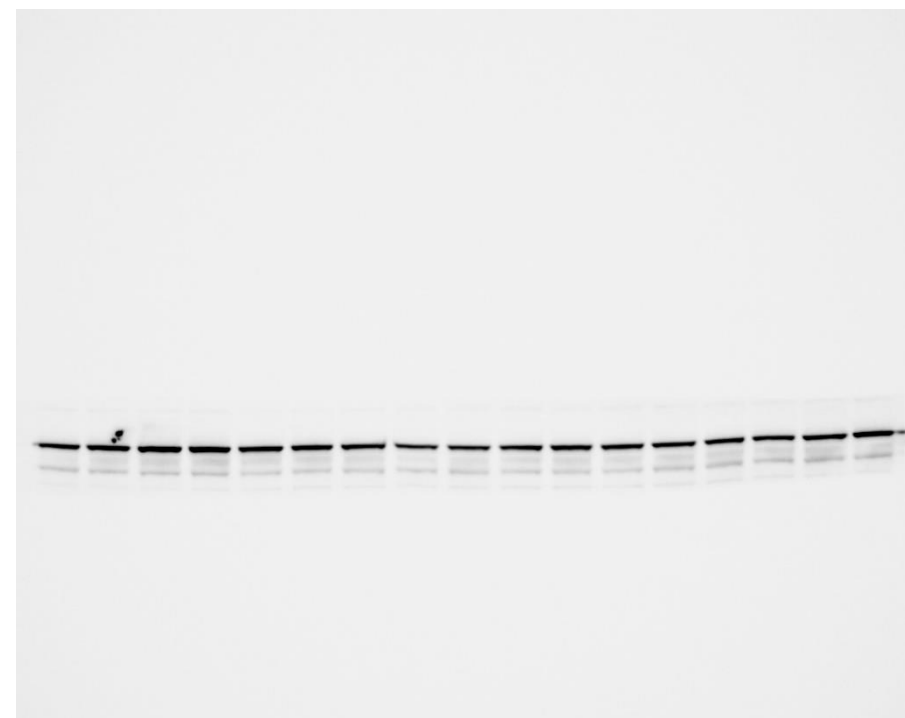

# Figure S5. Unedited blots from Figure 6

**Ponceau staining males**

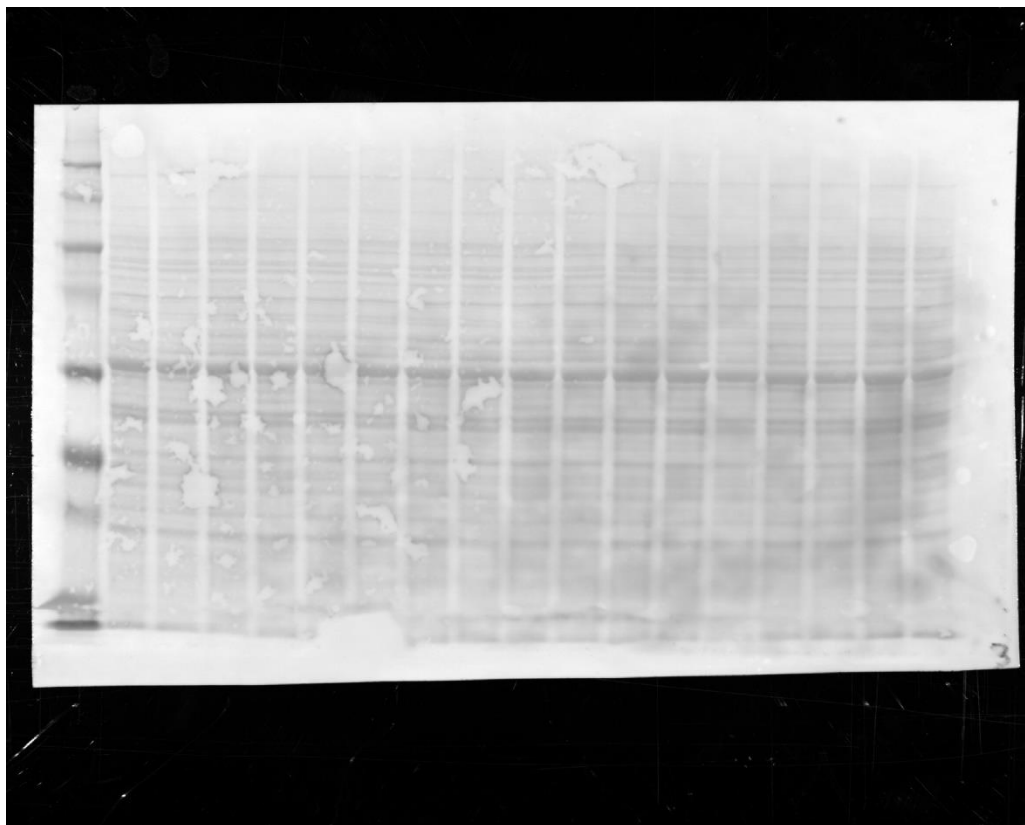

**Ponceau staining females**

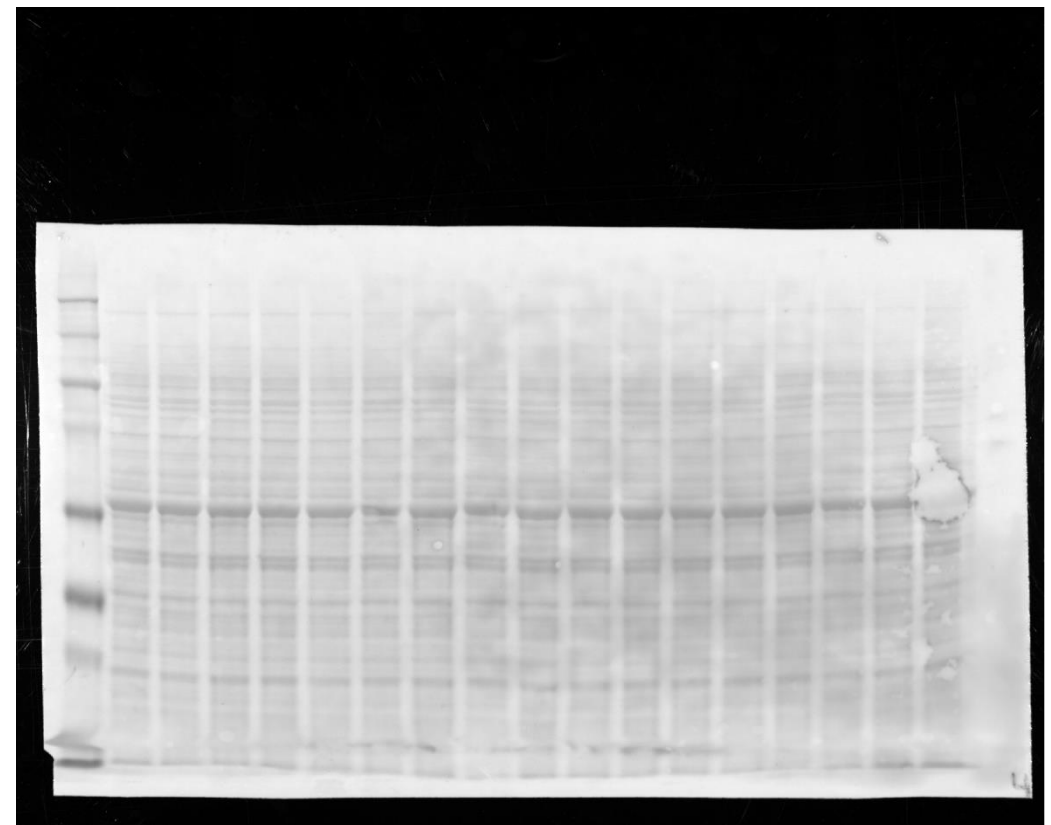

# Figure S5. Unedited blots from Figure 7

**p-mTOR males**

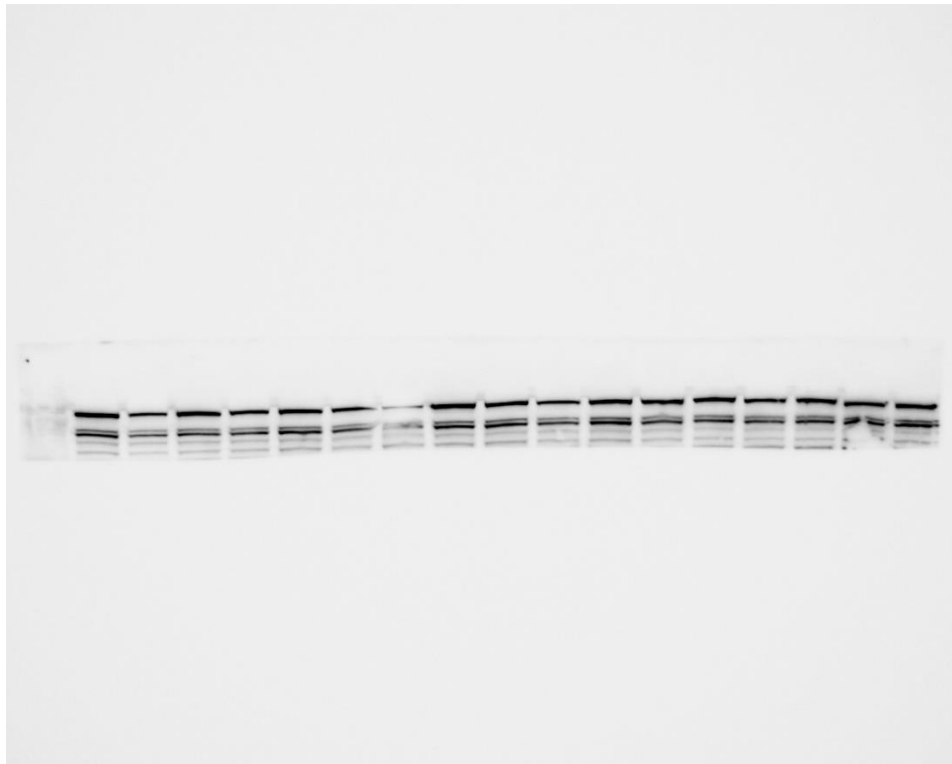

**p-mTOR females**

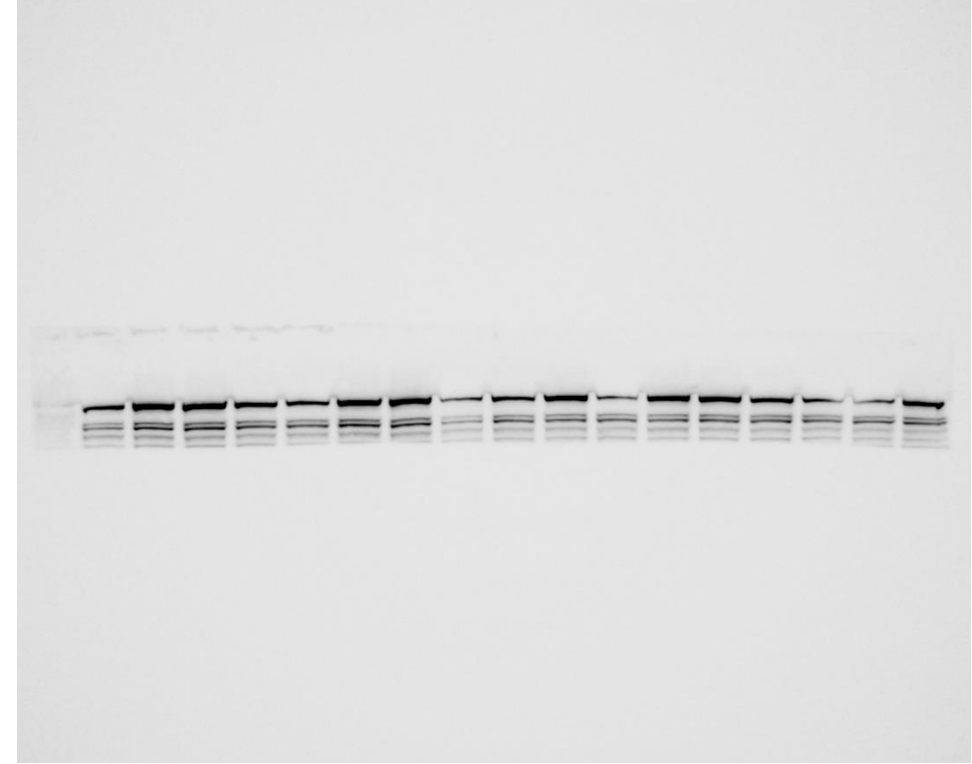

**mTOR males**

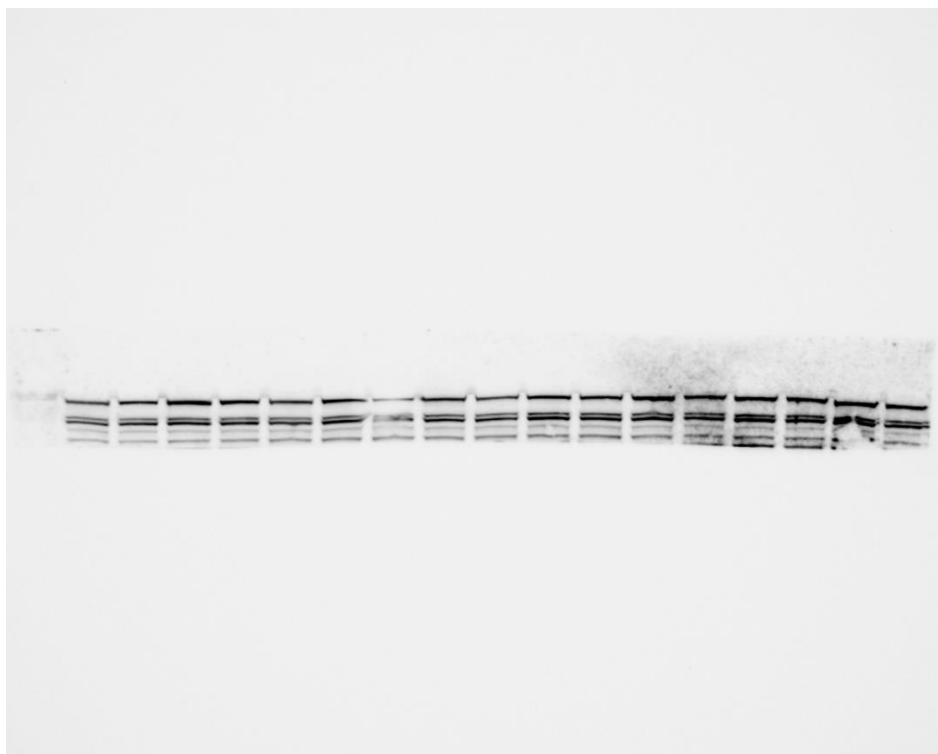

**mTOR females**

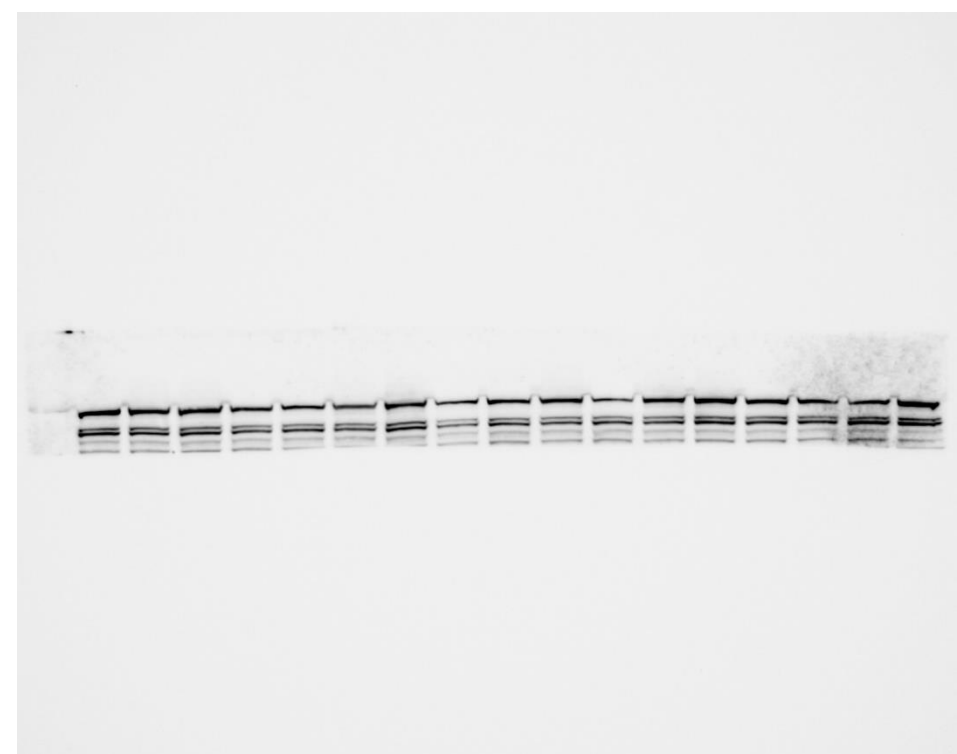

# Figure S5. Unedited blots from Figure 7

**p-AMPK males**

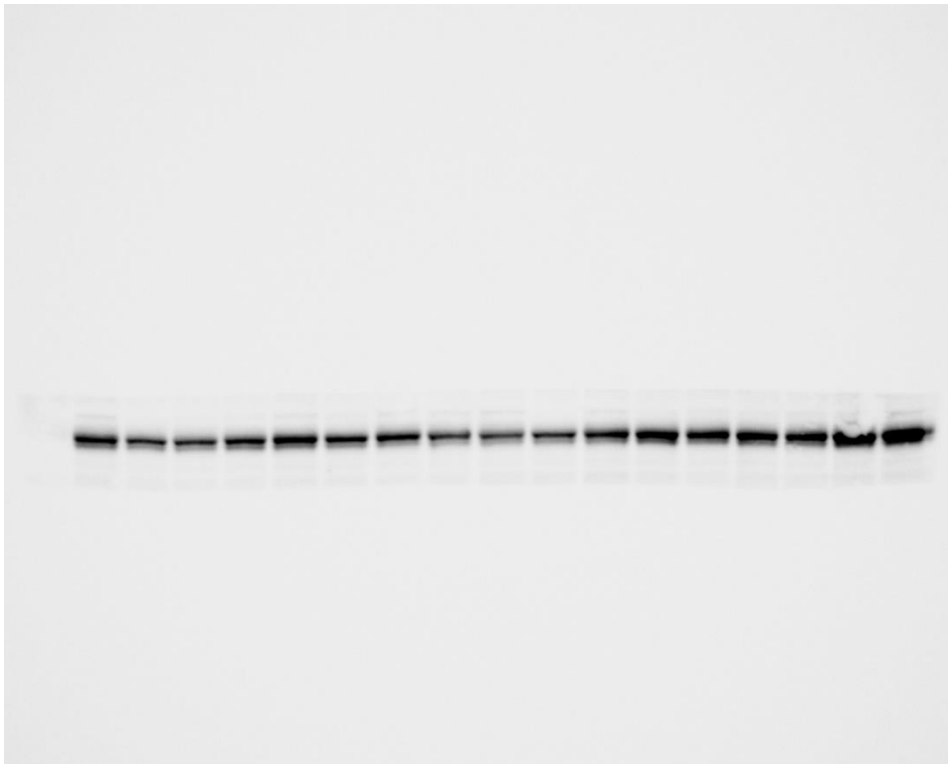

**p-AMPK females**

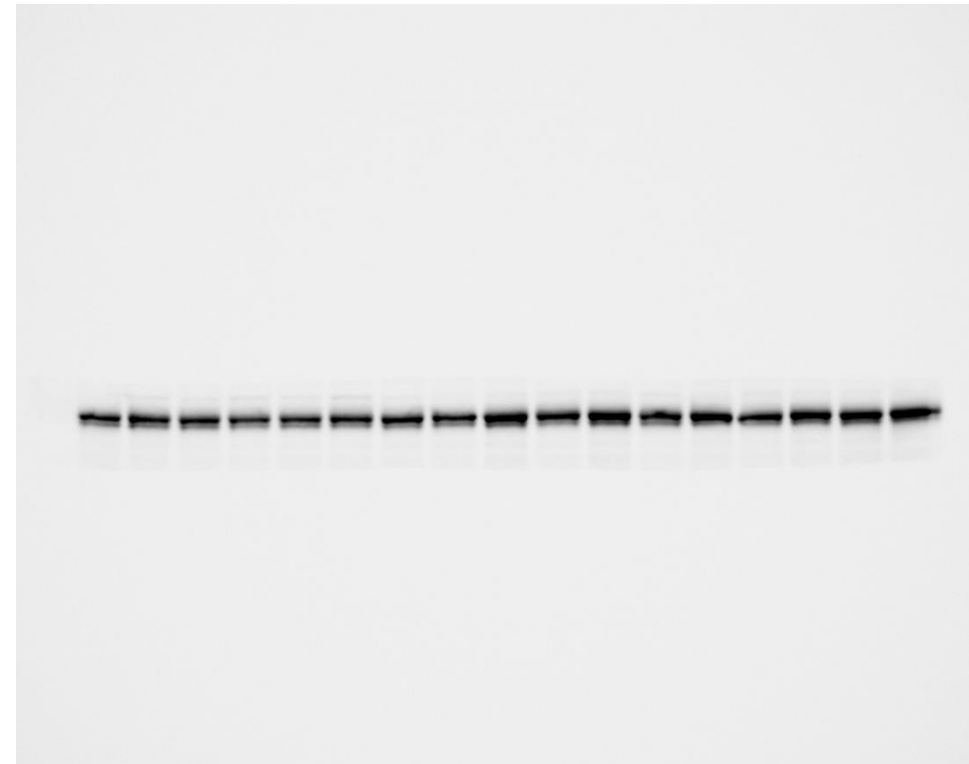

**AMPK males**

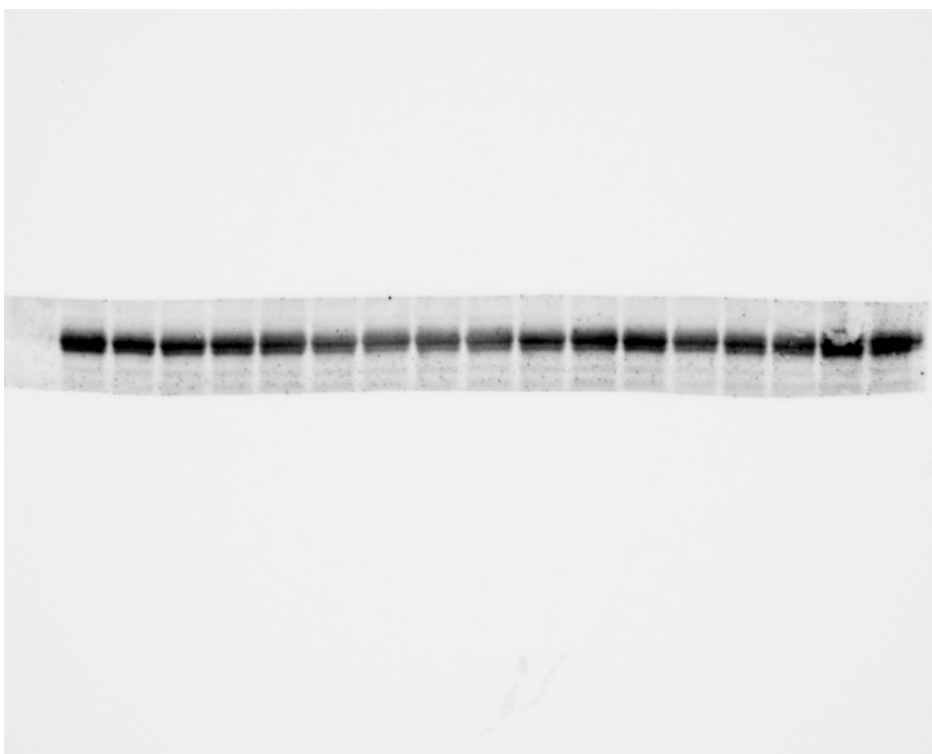

**AMPK females**

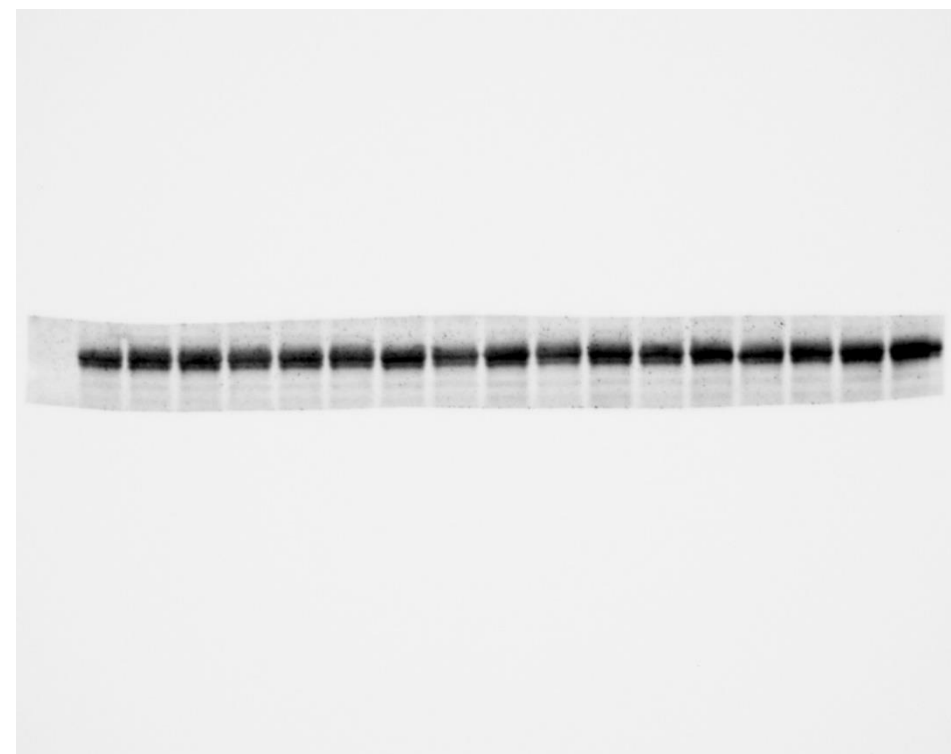

# Figure S5. Unedited blots from Figure 7

**p-ERK1 & p-ERK2**

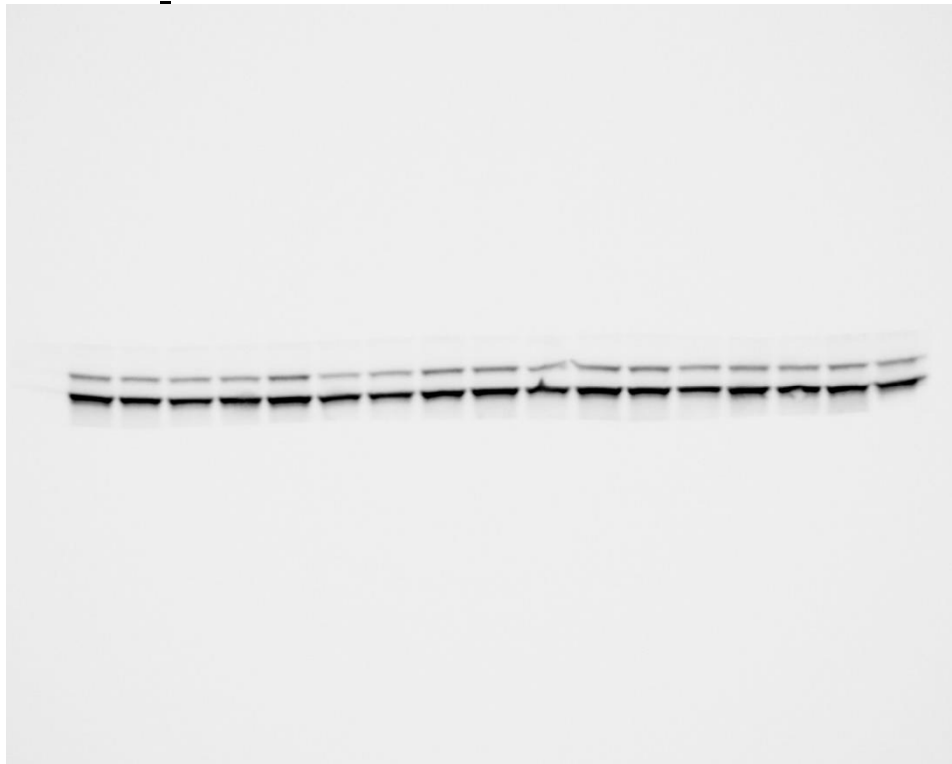

**p-ERK1 & p-ERK2 females**

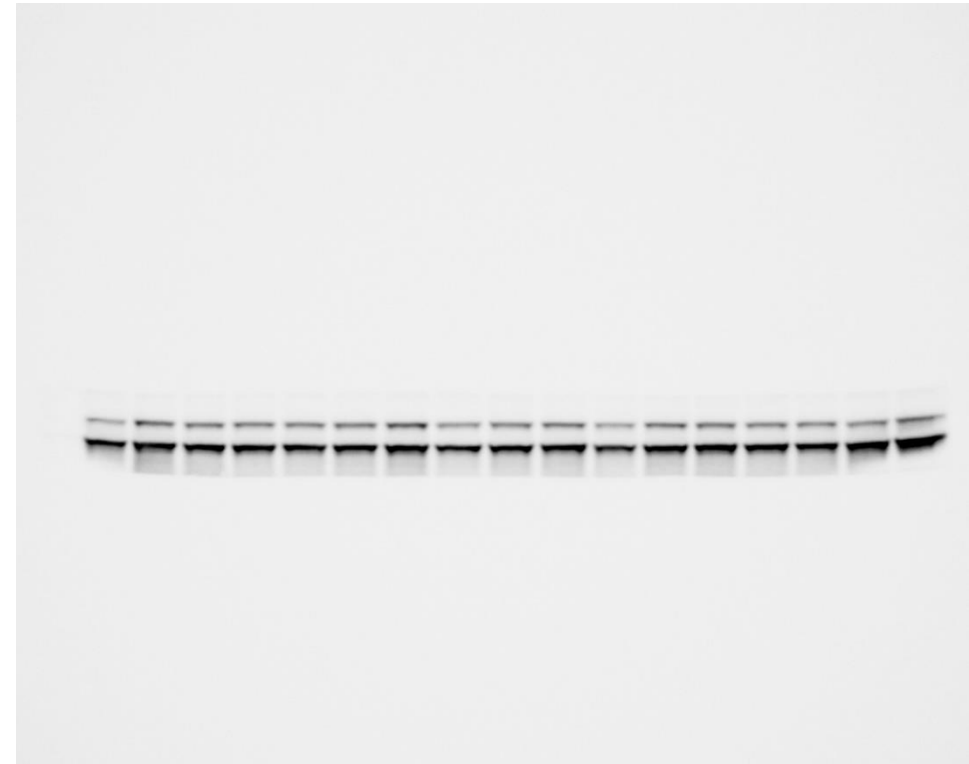

**ERK1 & ERK2 males**

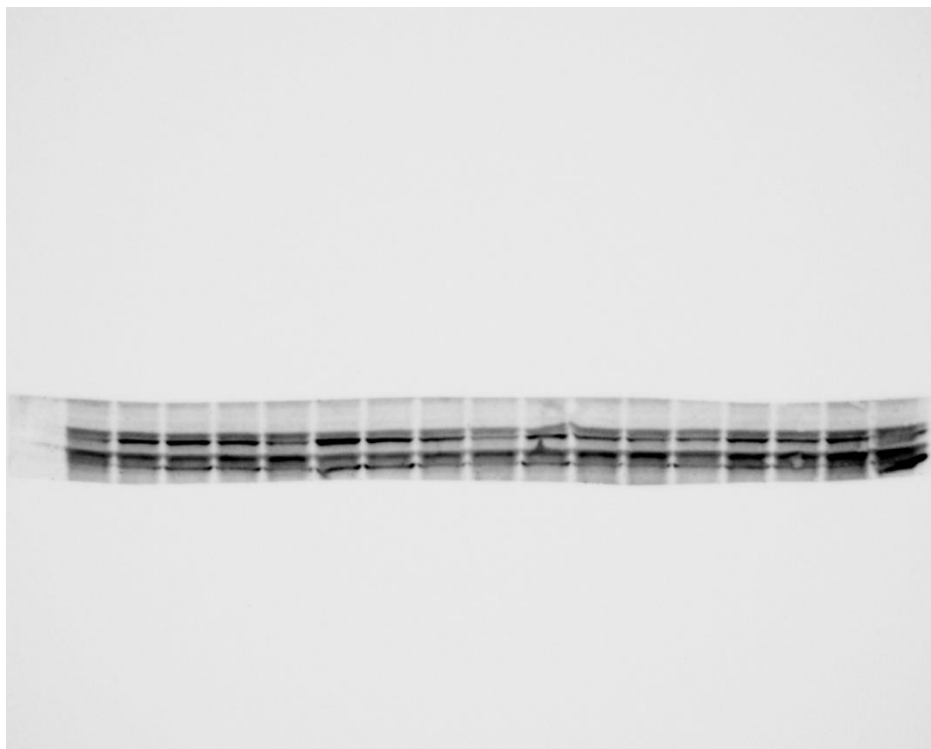

**ERK1 & ERK2 females**

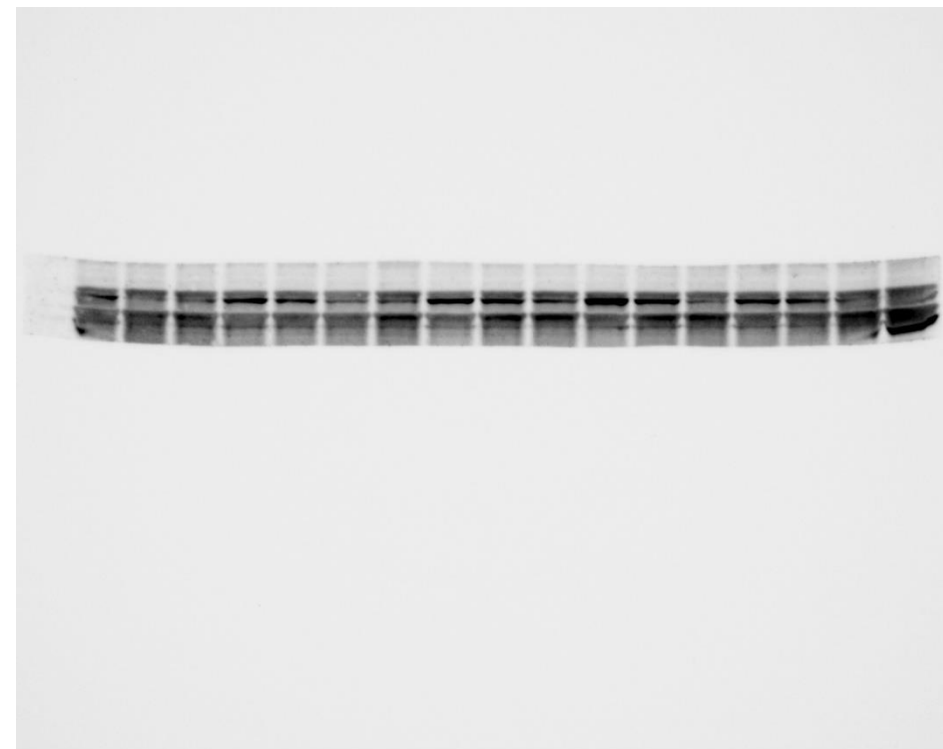

## Figure S5. Unedited blots from Figure 7

**$\gamma$ -adaptin males**

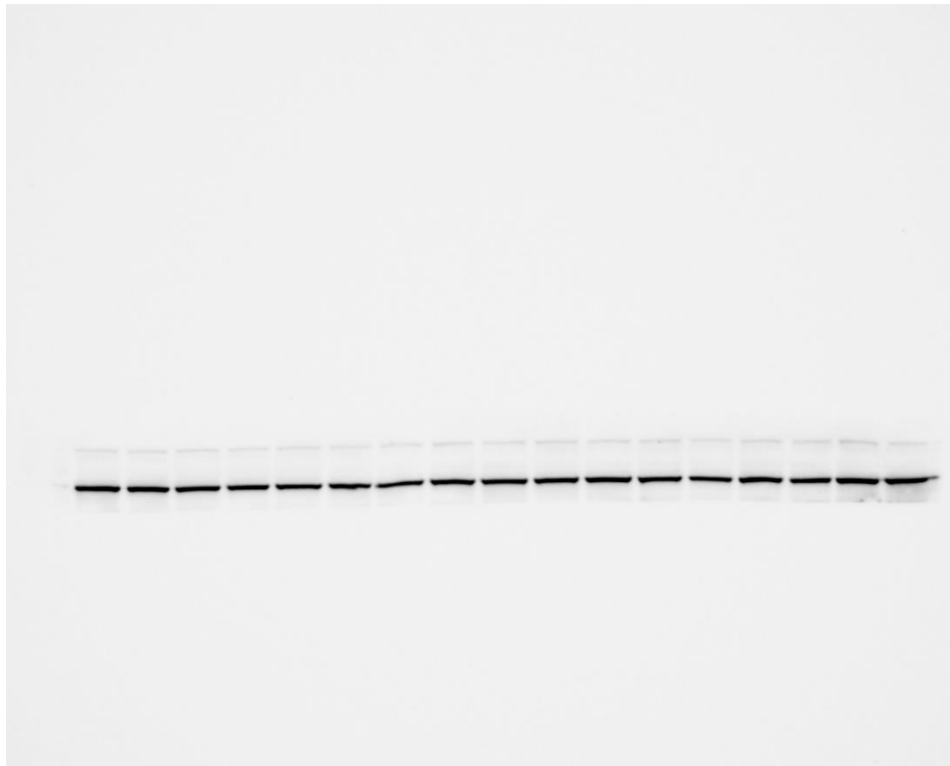

**$\gamma$ -adaptin females**

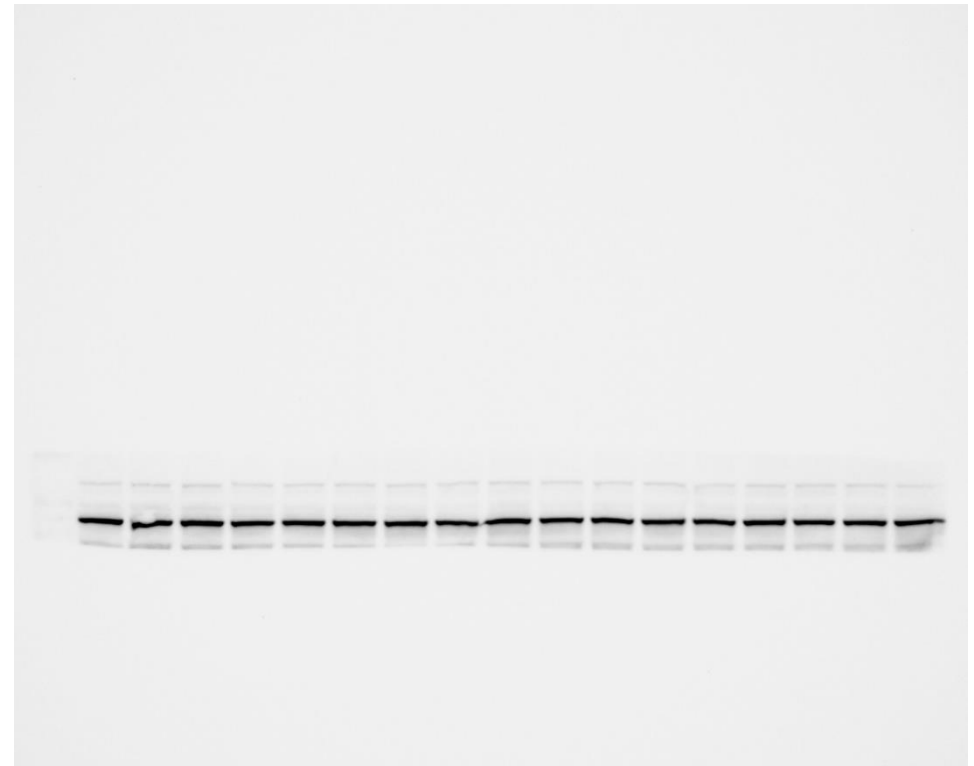

**Ponceau staining males**

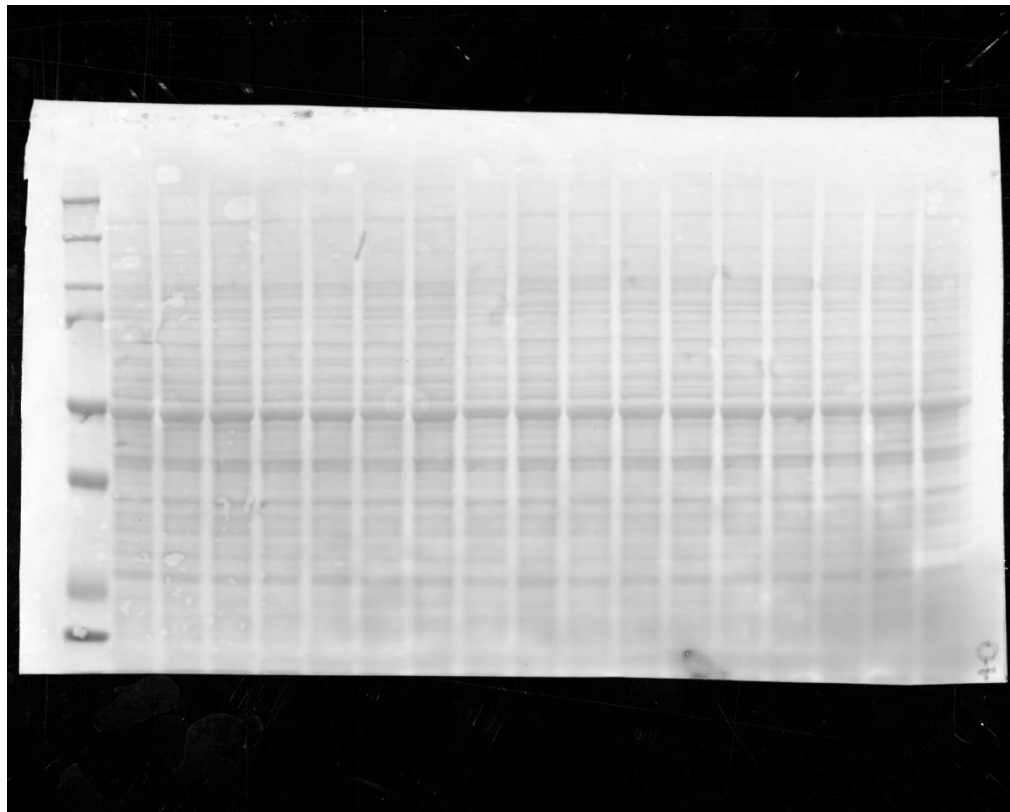

**Ponceau staining females**

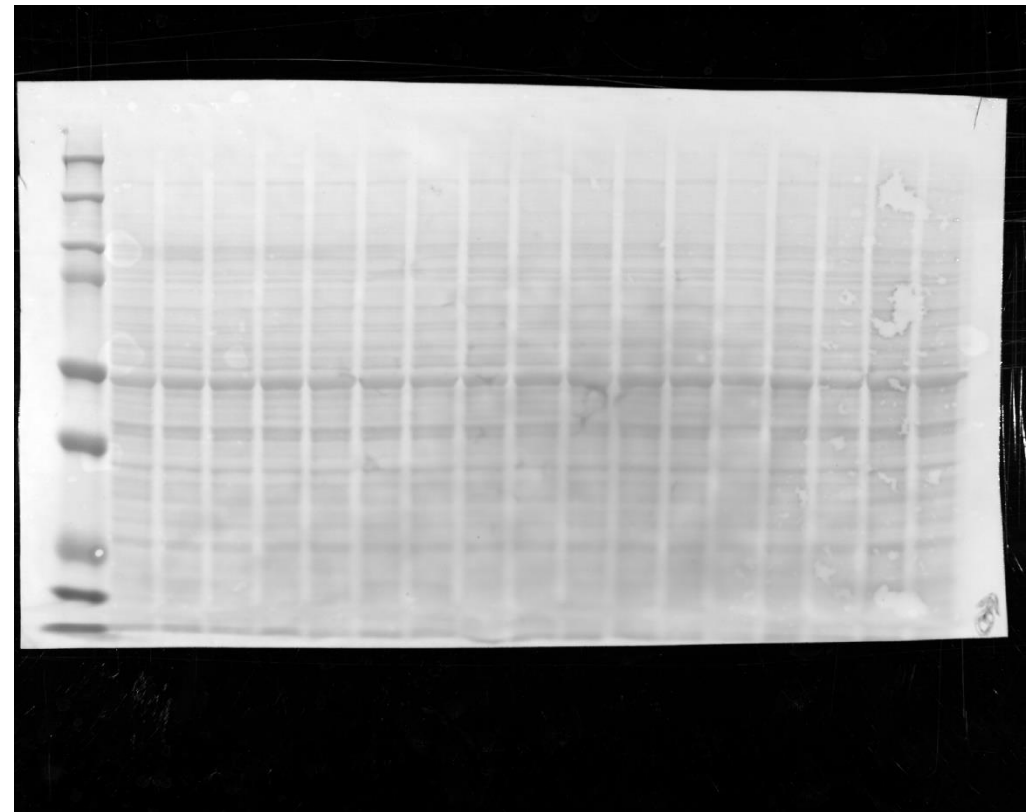

# Figure S5. Unedited blots from Figure S3

**UCP1 males**

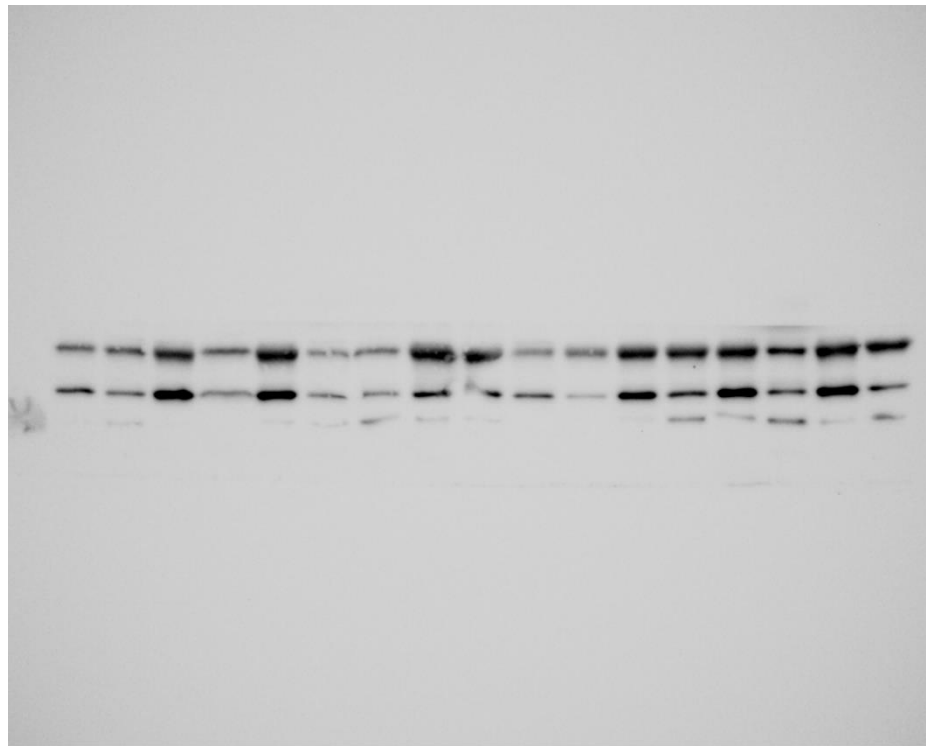

**UCP1 females**

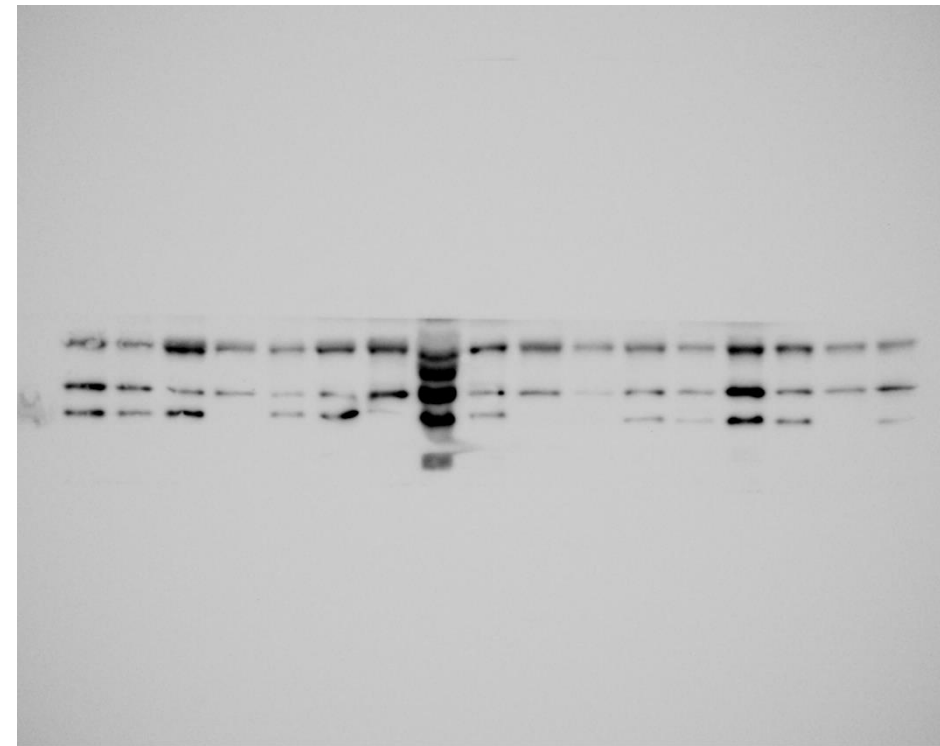

**$\gamma$ -adaptin males**

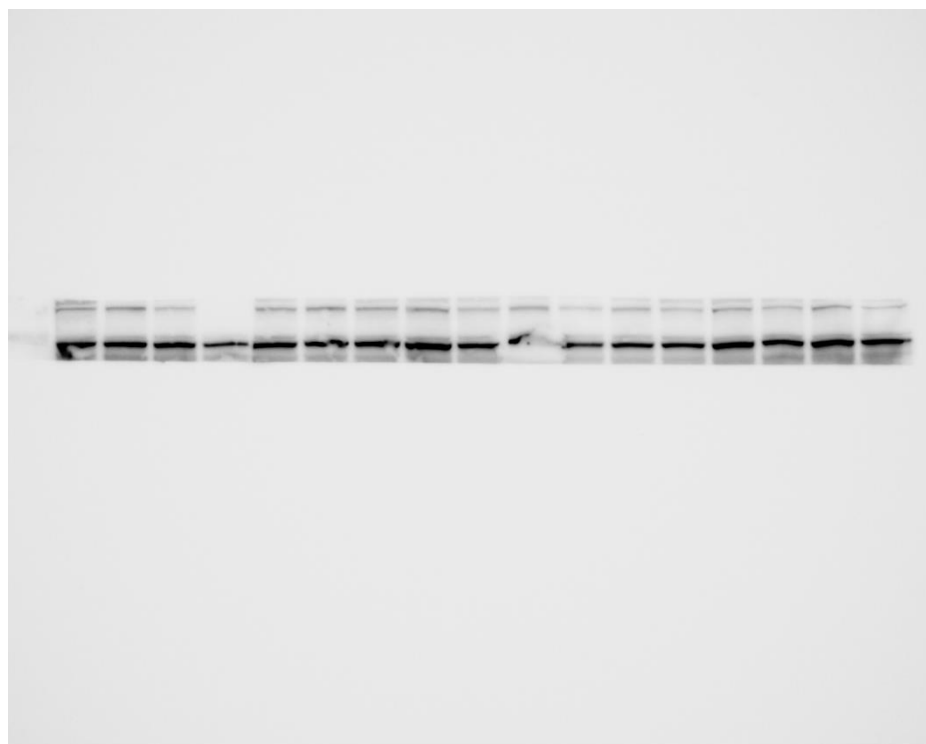

**$\gamma$ -adaptin females**

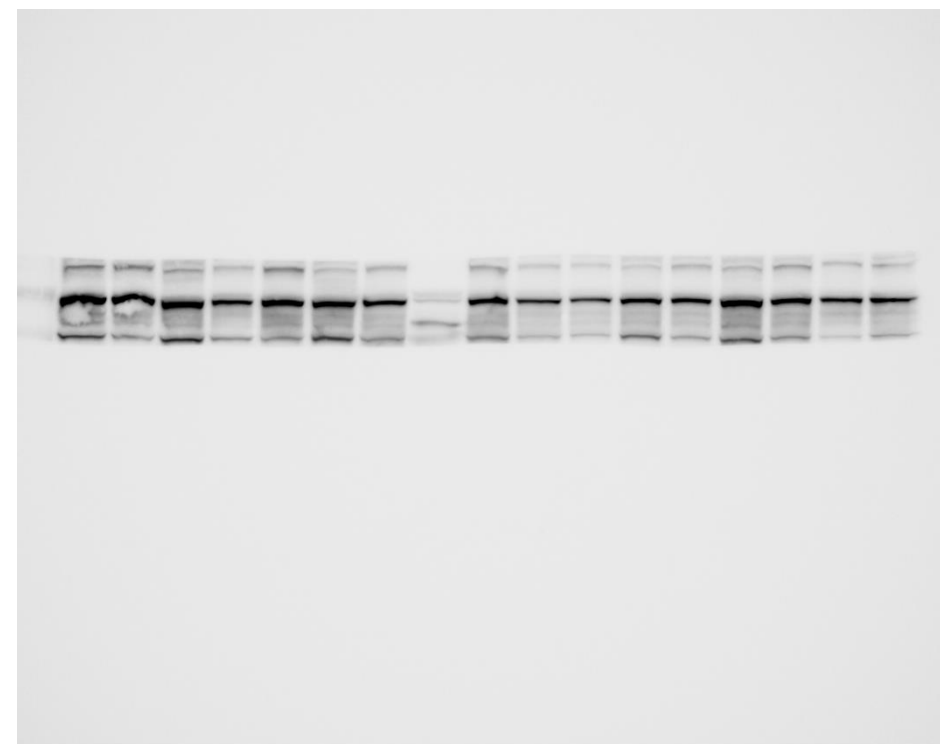

## Figure S5. Unedited blots from Figure S3

**Ponceau staining males**

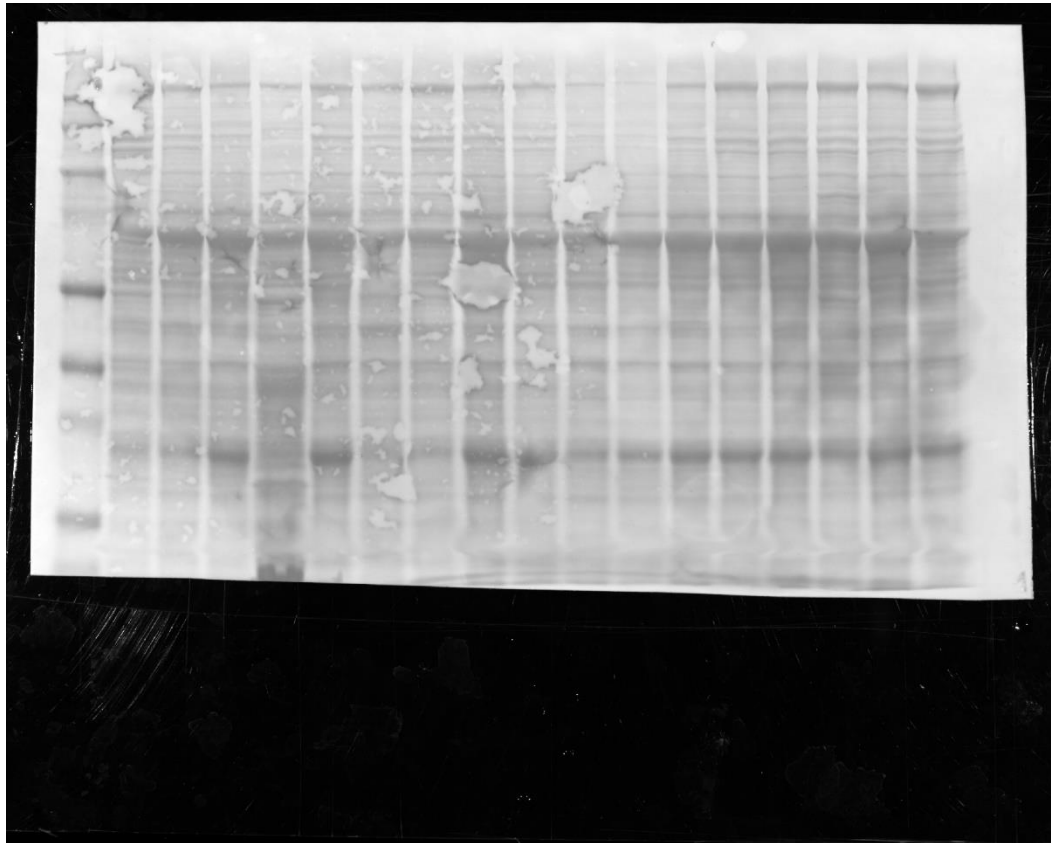

**Ponceau staining females**

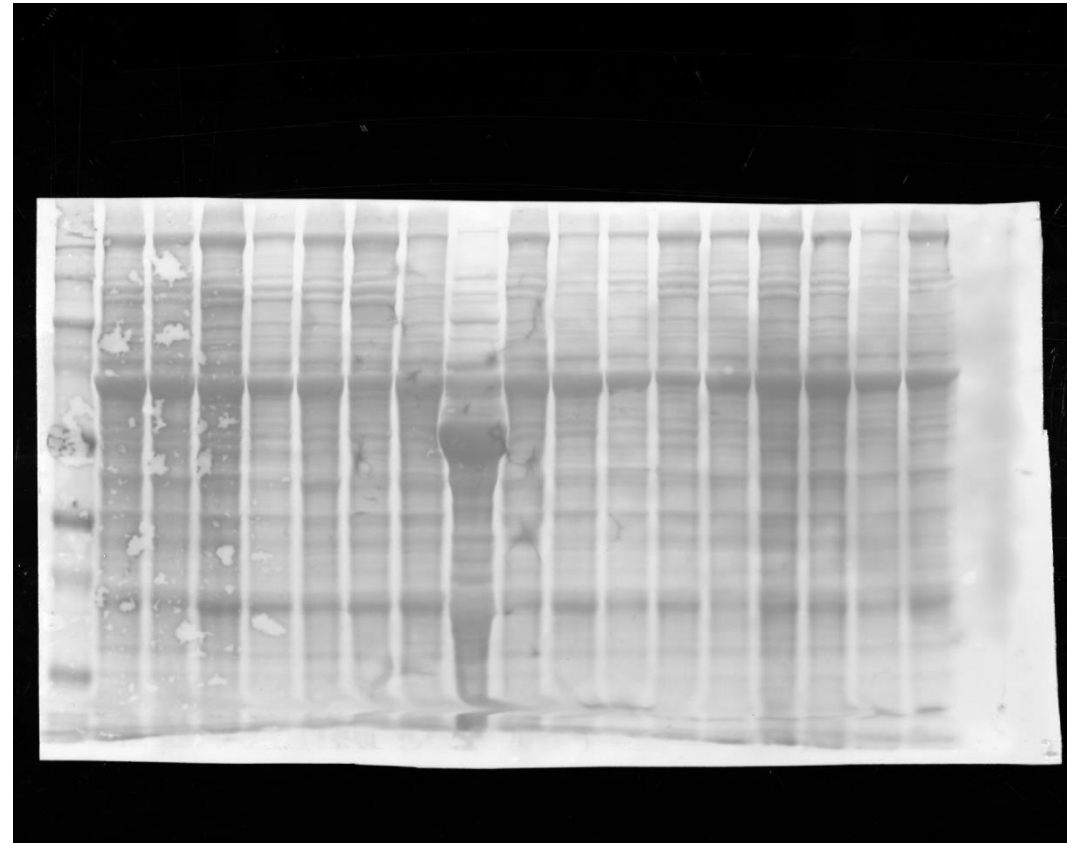



# Figure S5. Unedited blots from Figure S4.

**$\gamma$ -adaptin males**

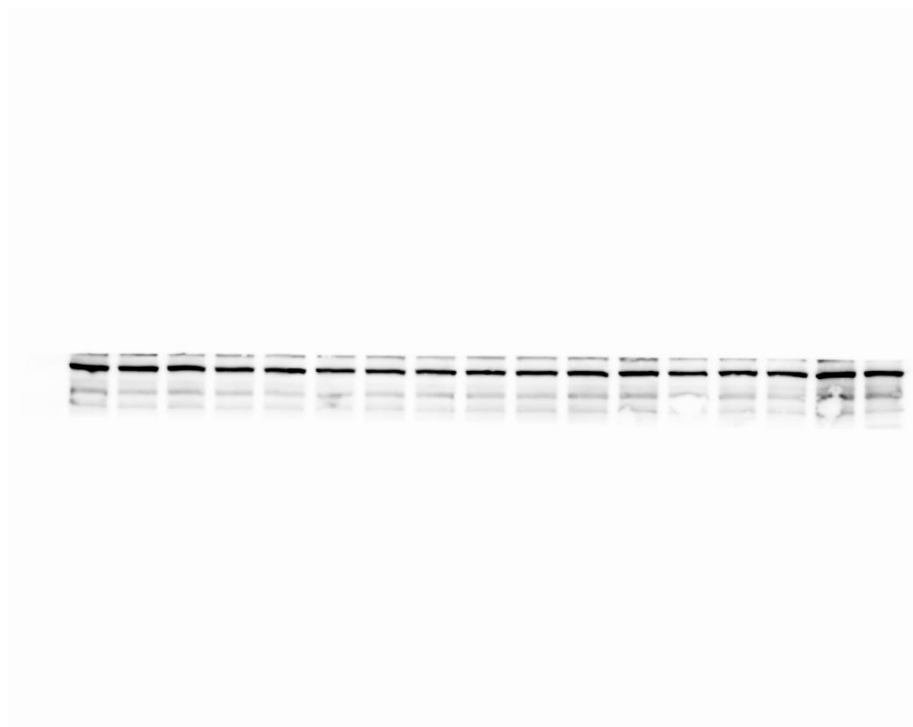

**$\gamma$ -adaptin females**

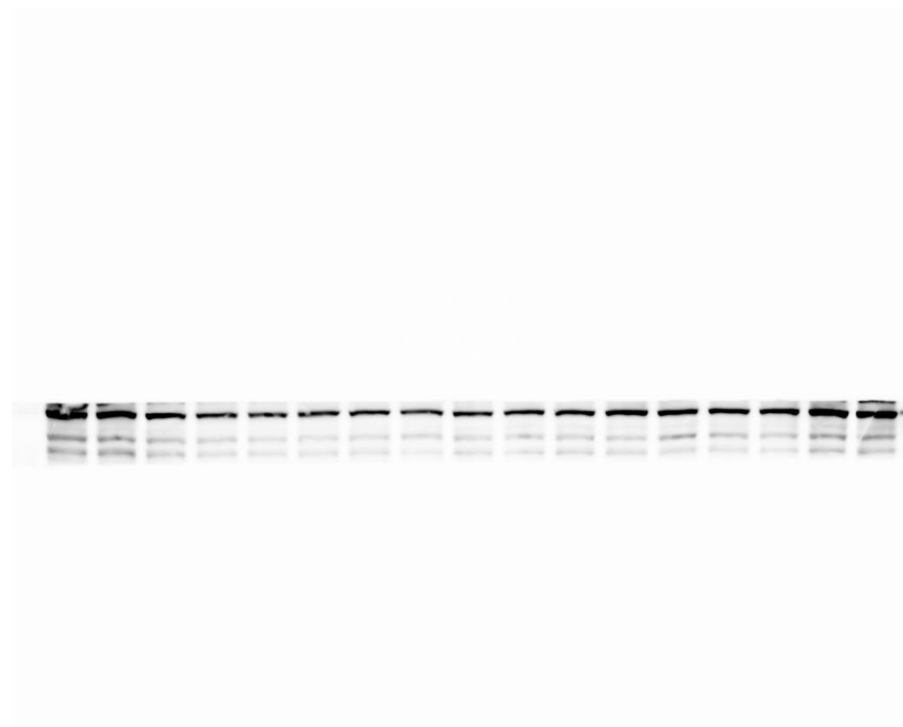

**P(Ser9)-GSK3- $\beta$  males**

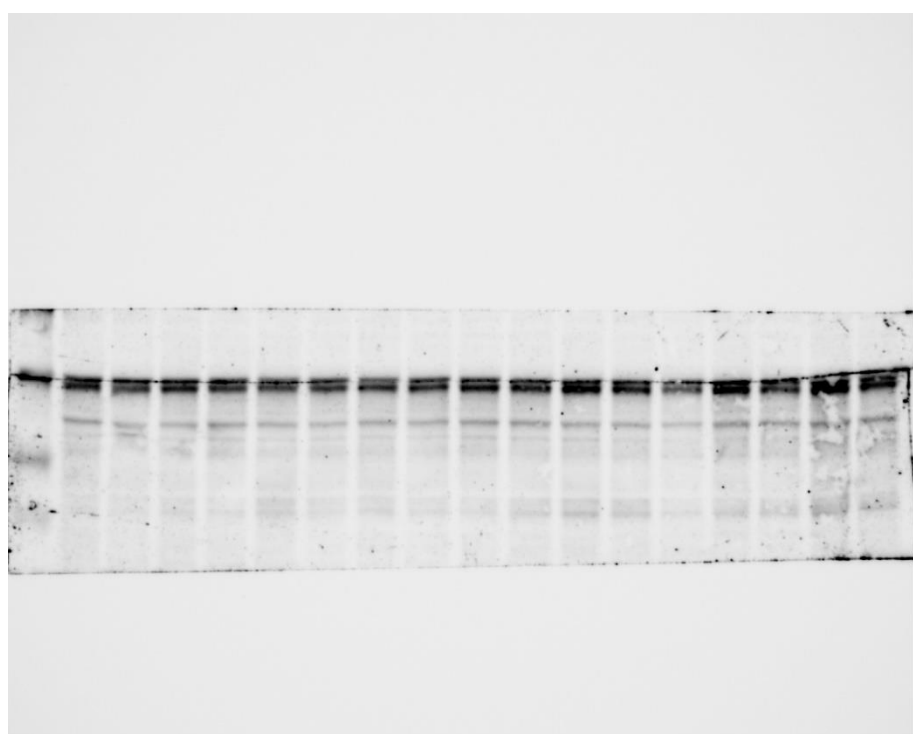

**P(Ser9)-GSK3- $\beta$  females**

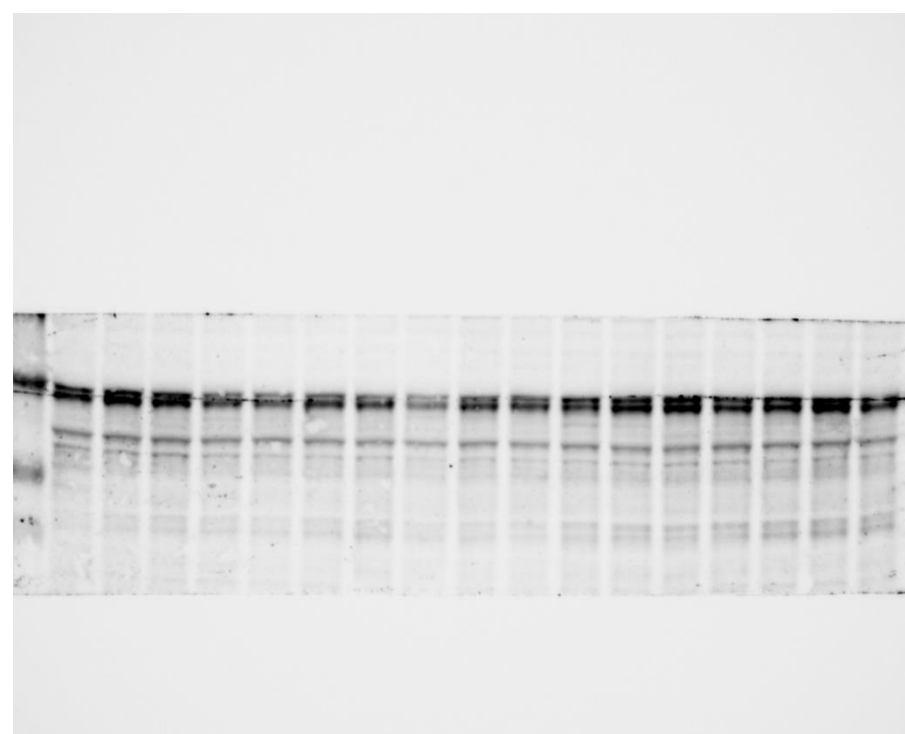

# Figure S5. Unedited blots from Figure S4.

**P(Tyr214/Tyr276)-GSK3- $\beta$   
males**

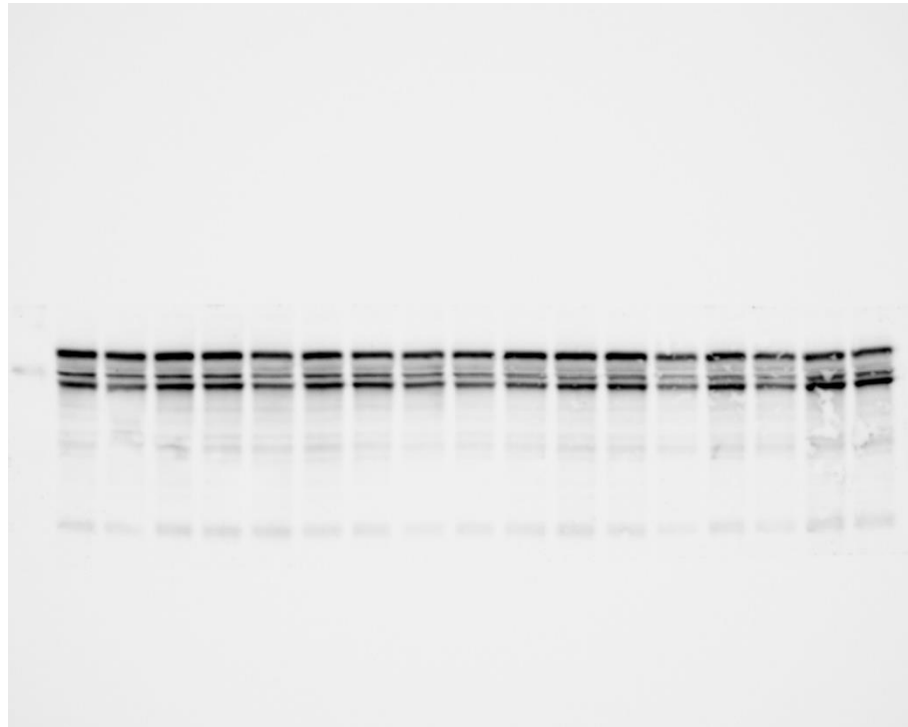

**P(Tyr214/Tyr276)-GSK3- $\beta$   
females**

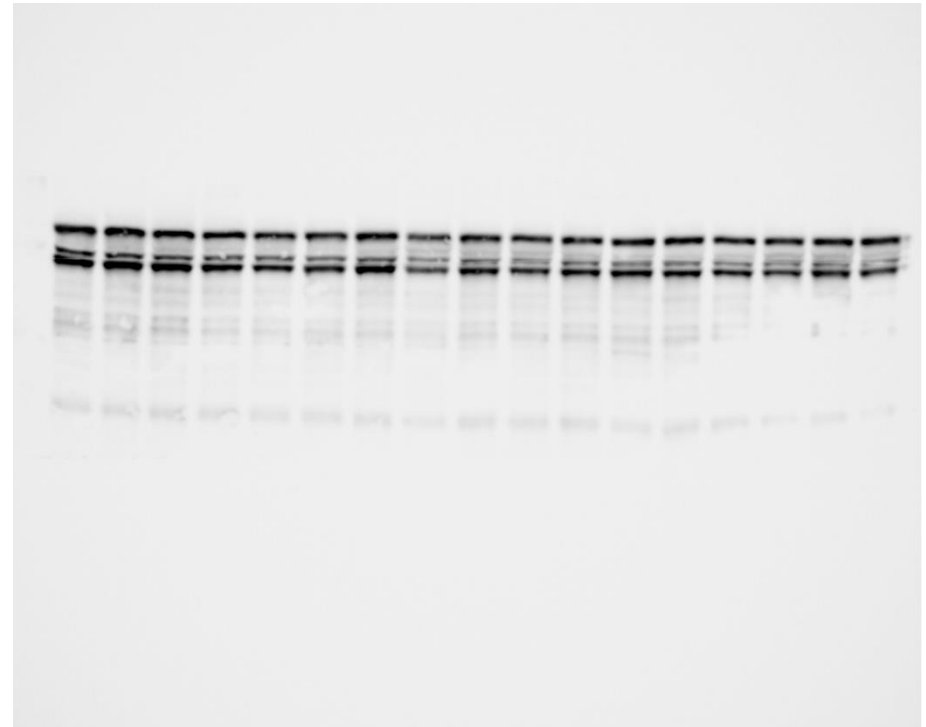

**GSK3- $\beta$  males**

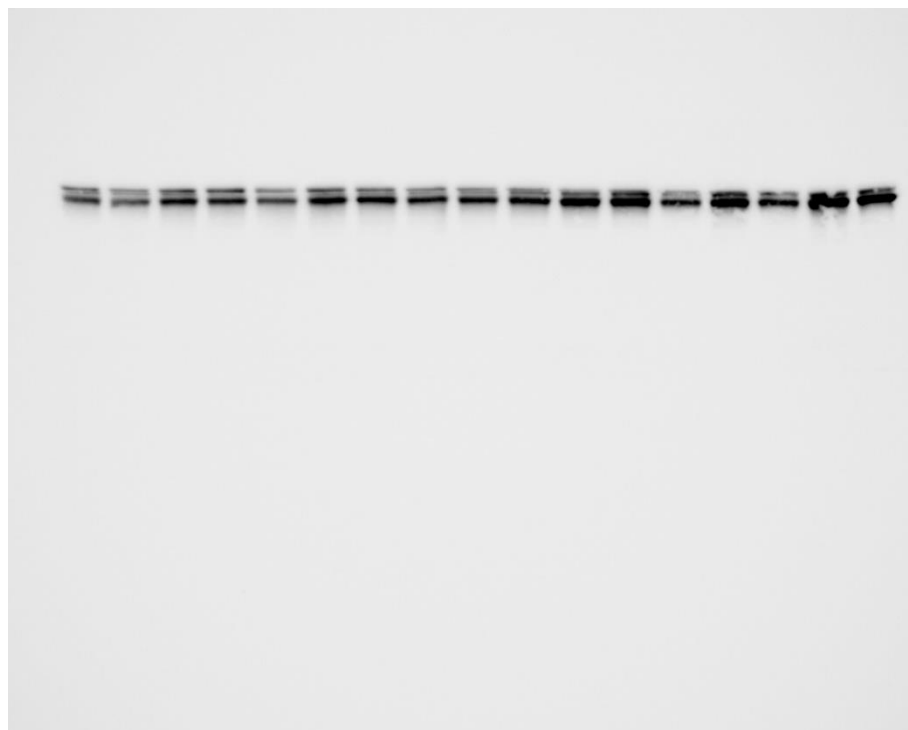

**GSK3- $\beta$  females**

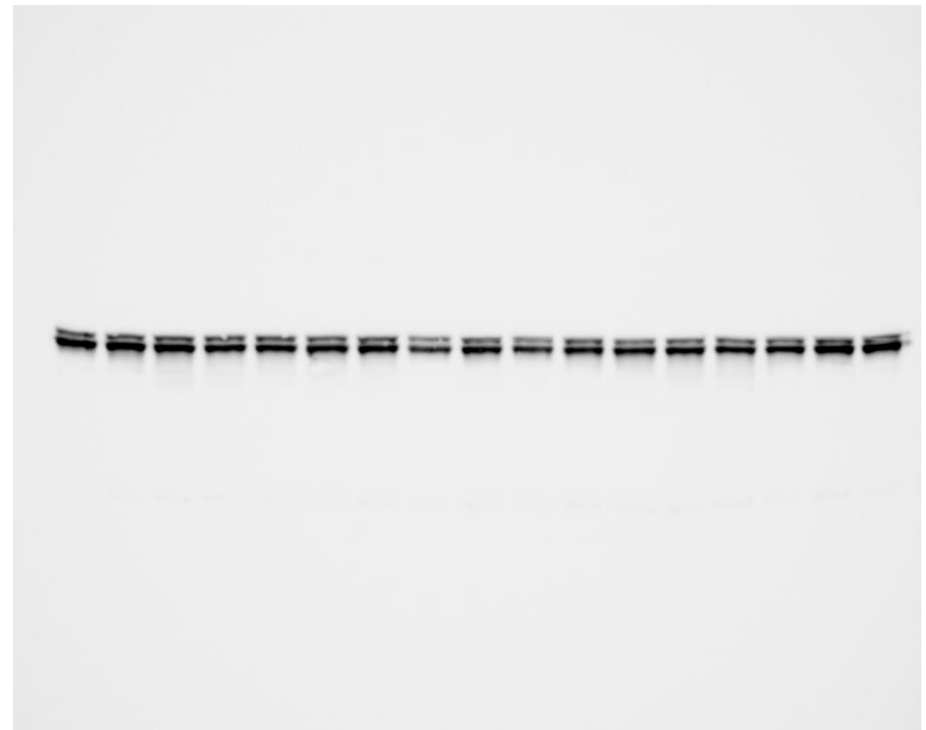

# Figure S5. Unedited blots from Figure S4.

**Ponceau staining males**

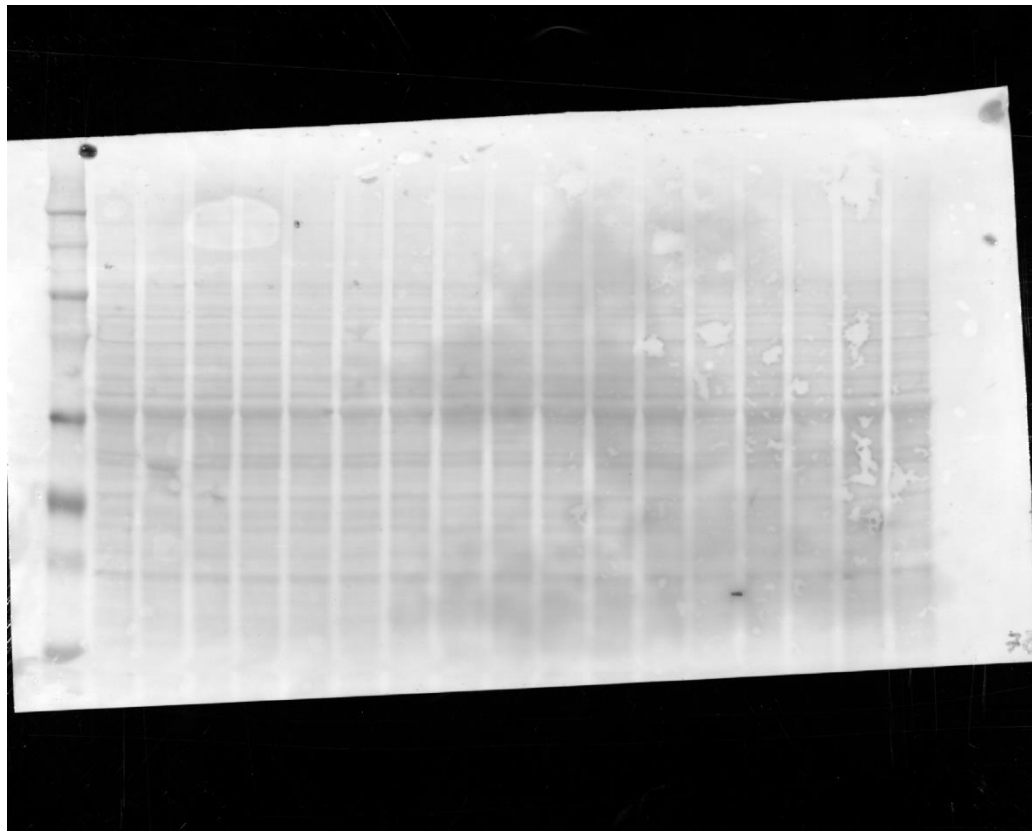

**Ponceau staining females**

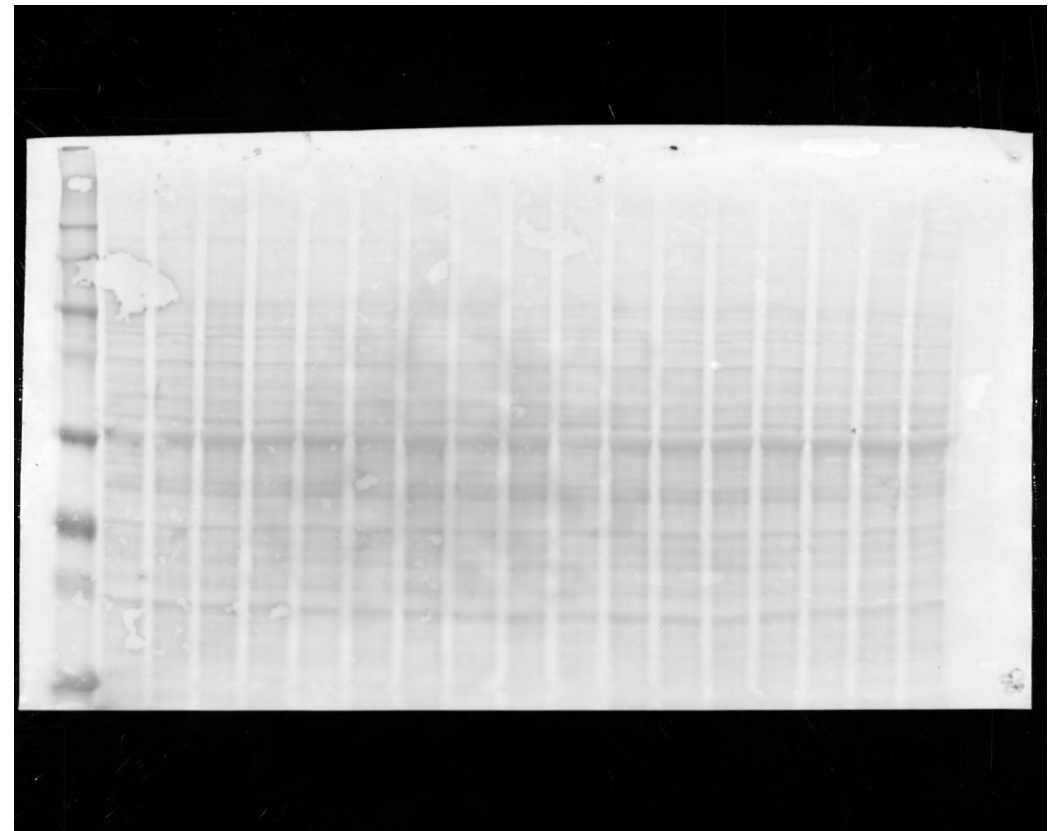

Supplement: s1 [file s1]
