# Supplementary material for: A Negative Energy Balance Is Associated with Metabolic Dysfunctions in the Hypothalamus of a Humanized Preclinical Model of Alzheimer’s Disease, the 5XFAD Mouse
Source: MDPI journal article supplement (doi:10.3390/ijms22105365), 2021-05-20
Supplement: s1 [file s1]

## Figure S4

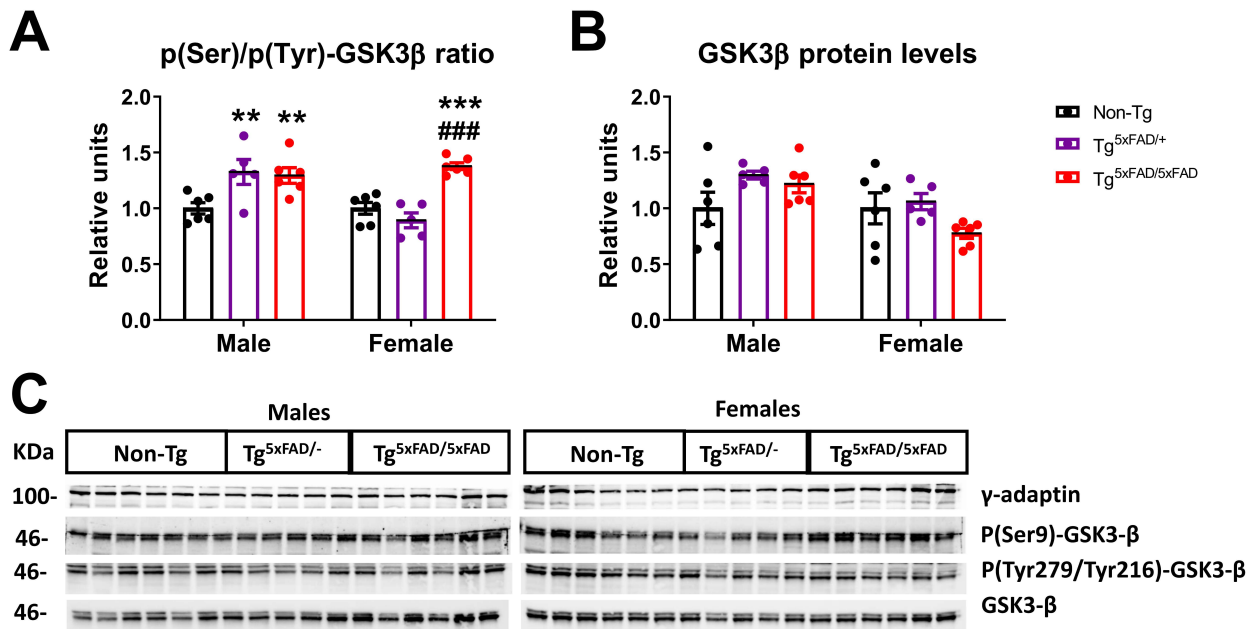

Figure S4: Densitometric evaluation of the ratio of serine (inhibitory) and tyrosine (activating) phosphorylation of GSK3- $\beta$  (A) and GSK3- $\beta$  protein levels (B) in the hypothalamus of 5xFAD mice at 6 months of age, showing increased Ser/Tyr ratio in transgenic 5xFAD male and female mice (n = 5–6 per group). Protein levels were normalized with  $\gamma$ -adaptin. Non-Tg males were set as 1 for protein relative units. Two-way ANOVA analysis with Tukey's post hoc test: \* =  $p < 0.05$ , \*\* =  $p < 0.01$ , \*\*\* =  $p < 0.001$  vs. same-sex non-Tg group; # =  $p < 0.05$ , ## =  $p < 0.01$ , ### =  $p < 0.001$  versus same-sex Tg<sup>5xFAD/-</sup> group
