# Supplementary material for: A Negative Energy Balance Is Associated with Metabolic Dysfunctions in the Hypothalamus of a Humanized Preclinical Model of Alzheimer’s Disease, the 5XFAD Mouse
Source: MDPI journal article supplement (doi:10.3390/ijms22105365), 2021-05-20
Supplement: s1 [file s1]

**Figure S1**

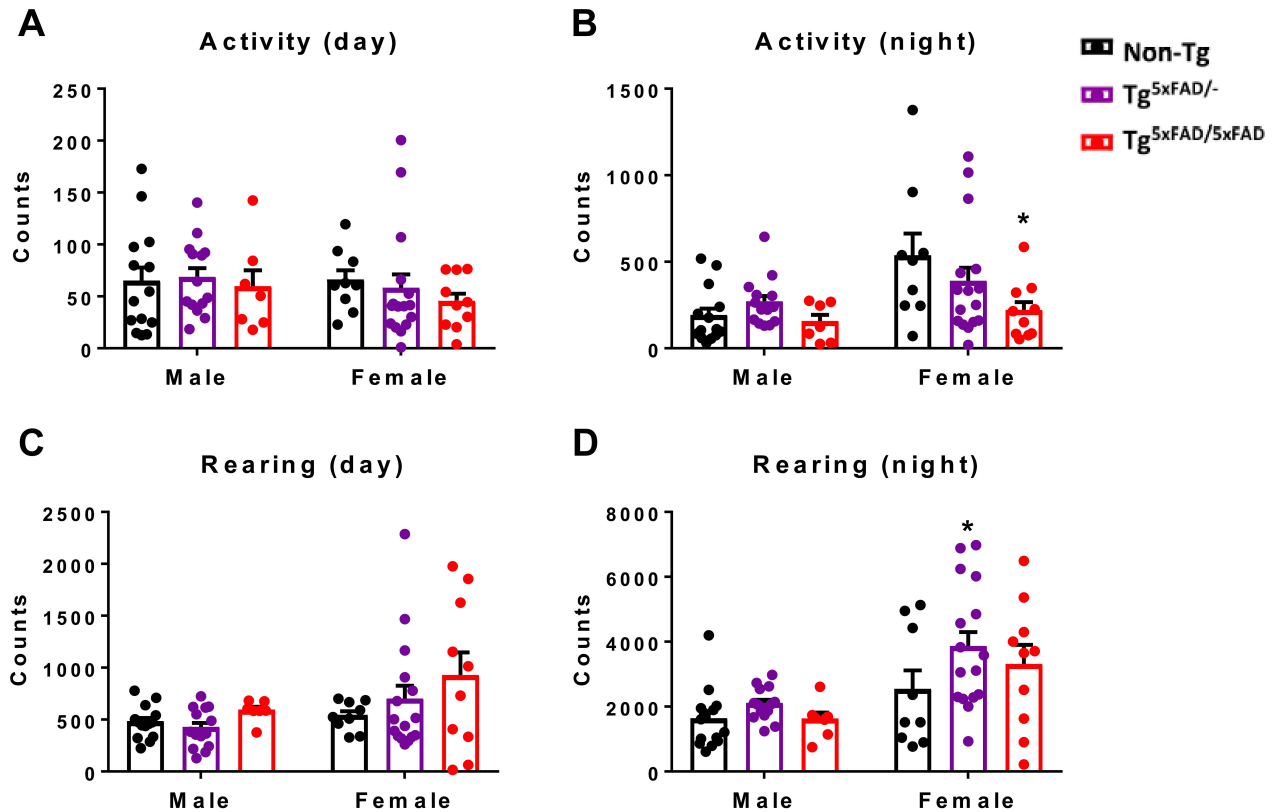

Figure S1: Activity (A,B) and rearing (C,D) measured as counts by infrared in 5xFAD mice placed in metabolic cages for 48 h, showing decreased activity in Tg<sup>5xFAD/5xFAD</sup> females during the night (n = 8–15 per group). Two-way ANOVA analysis with Tukey's post hoc test: \* = p < 0.05 versus same-sex non-Tg group.
