# Supplementary material for: A Negative Energy Balance Is Associated with Metabolic Dysfunctions in the Hypothalamus of a Humanized Preclinical Model of Alzheimer’s Disease, the 5XFAD Mouse
Source: MDPI journal article supplement (doi:10.3390/ijms22105365), 2021-05-20
Supplement: s1 [file s1]

**Figure S2**

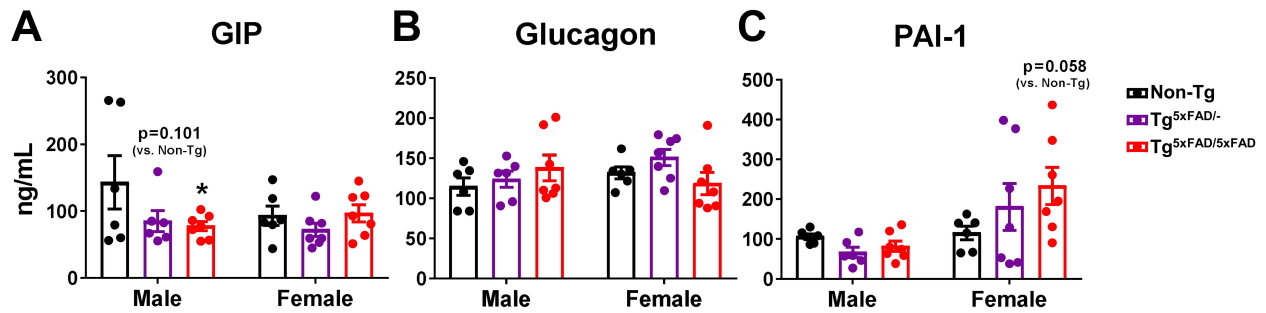

Figure S2: Plasma levels of gastric inhibitory polypeptide ((A), GIP), glucagon (B), and plas-minogen activator inhibitor-1 ((C), PAI-1) plasma levels showing a tendency to decreased GIP in males and increased PAI-1 in females (n = 6–7 per group).
