# Supplementary material for: A Negative Energy Balance Is Associated with Metabolic Dysfunctions in the Hypothalamus of a Humanized Preclinical Model of Alzheimer’s Disease, the 5XFAD Mouse
Source: MDPI journal article supplement (doi:10.3390/ijms22105365), 2021-05-20
Supplement: s1 [file s1]

### Supplementary Tables

**Table S1.** Primer references for TaqMan® Gene Expression Assays (Applied Biosystems).

| Gene ID       | GenBank accession n° | Assay ID      | Amplicon length |
|---------------|----------------------|---------------|-----------------|
| <i>Actb</i>   | NM_007393.5          | Mm02619580_g1 | 143             |
| <i>Agrp</i>   | NM_007427.3          | Mm00475829_g1 | 86              |
| <i>Bdnf</i>   | NM_001048142.1       | Mm04230607_s1 | 92              |
| <i>Blvra</i>  | NM_026678.4          | Mm00466076_m1 | 73              |
| <i>Cartpt</i> | NM_013732.7          | Mm04210469_m1 | 102             |
| <i>Ghrl</i>   | NM_021488.5          | Mm00612524_m1 | 104             |
| <i>Ghsr</i>   | NM_177330.4          | Mm00616415_m1 | 63              |
| <i>Glp1r</i>  | NM_021332.2          | Mm00445292_m1 | 70              |
| <i>Hcrt</i>   | NM_010410.2          | Mm01964030_s1 | 168             |
| <i>Igf1r</i>  | NM_010513.2          | Mm00802831_m1 | 106             |
| <i>Il1b</i>   | NM_008361.3          | Mm00434228_m1 | 90              |
| <i>Il6</i>    | NM_031168.1          | Mm00446190_m1 | 78              |
| <i>Insr</i>   | NM_010568.2          | Mm01211879_m1 | 102             |
| <i>Lepr</i>   | NM_001122899.1       | Mm00440181_m1 | 97              |
| <i>Npy</i>    | NM_023456.2          | Mm01410146_m1 | 130             |
| <i>Pmch</i>   | NM_029971.2          | Mm01242886_g1 | 78              |
| <i>Pomc</i>   | NM_001278581.1       | Mm00435874_m1 | 60              |
| <i>Retn</i>   | NM_001204959.1       | Mm00445641_m1 | 80              |
| <i>S100b</i>  | NM_009115.3          | Mm00485897_m1 | 69              |
| <i>Tlr4</i>   | NM_021297.2          | Mm00445273_m1 | 87              |
| <i>Tnf</i>    | NM_001278601.1       | Mm00443258_m1 | 81              |

**Table S2.** Antibody references for Western Blot Assays.

| <b>Primary antibody</b>         | <b>Specie</b> | <b>Manufacturing details</b> | <b>Dilution</b> |
|---------------------------------|---------------|------------------------------|-----------------|
| AMPK                            | Rabbit        | Cell Signaling (#5832)       | 1:1000          |
| P(Ser202, Thr205)-Tau (AT8)     | Mouse         | ThermoFisher (#MN1020)       | 1:500           |
| CDK5                            | Mouse         | Cell Signaling (#12134)      | 1:1000          |
| ERK1/2                          | Rabbit        | Cell Signaling (#9102)       | 1:1000          |
| GFAP                            | Mouse         | Sigma-Aldrich (G3893)        | 1:500           |
| GHSR                            | Rabbit        | ThermoFisher (PA5-28752)     | 1:1000          |
| GLP-1R                          | Rabbit        | Abcam (ab39072)              | 1:500           |
| P(Ser9)-GSK3- $\beta$           | Rabbit        | Cell Signaling (#9322)       | 1:1000          |
| P(Tyr279/Tyr216)-GSK3           | Mouse         | Sigma-Aldrich (05-413)       | 1:1000          |
| GSK3- $\beta$                   | Rabbit        | Cell Signaling (#12456S)     | 1:1000          |
| Iba1                            | Rabbit        | Abcam (ab5076)               | 1:1000          |
| IL-1 $\beta$                    | Mouse         | Cell Signaling (#12242)      | 1:1000          |
| IR                              | Mouse         | Cell Signaling (#3020)       | 1:1000          |
| IRS1                            | Rabbit        | Cell Signaling (#3407P)      | 1:1000          |
| LepR [EPR911(N)]                | Rabbit        | Abcam (ab177469)             | 1:500           |
| LRP1                            | Rabbit        | Cell Signaling (#64099)      | 1:1000          |
| mTOR                            | Rabbit        | Cell Signaling (#2972)       | 1:1000          |
| P(ser612)-IRS1                  | Rabbit        | Cell Signaling (#3203P)      | 1:1000          |
| P(Tyr892)-IRS1                  | Rabbit        | Abcam (ab46800)              | 1:1000          |
| P35/P25                         | Rabbit        | Cell Signaling (#2680)       | 1:1000          |
| P(Thr172)-AMPK                  | Rabbit        | Cell Signaling (#2535)       | 1:1000          |
| P(Thr202/Tyr204)-ERK1/2         | Rabbit        | Cell Signaling (#9101)       | 1:1000          |
| P(Tyr1158, Tyr1162, Tyr1163)-IR | Rabbit        | Abcam (ab5681)               | 1:1000          |
| P(Tyr1077)-LepR                 | Rabbit        | Sigma-Aldrich (07-1317)      | 1:1000          |
| P(Ser2448)-mTOR                 | Rabbit        | Cell Signaling (#2971)       | 1:1000          |
| P(Tyr703)-STAT3                 | Rabbit        | Cell Signaling (#91455)      | 1:1000          |
| P(Tyr694)-STAT5                 | Rabbit        | Cell Signaling (#9351)       | 1:500           |
| STAT3                           | Mouse         | Cell Signaling (#91395)      | 1:1000          |
| STAT5                           | Rabbit        | Cell Signaling (#9363)       | 1:1000          |
| Tau                             | Rabbit        | Abcam (ab203179)             | 1:500           |
| TLR4                            | Rabbit        | Abcam (ab217274)             | 1:1000          |
| UCP1                            | Rabbit        | Abcam (ab10983)              | 1:1000          |
| $\gamma$ -adaptin               | Mouse         | BD Biosciences (610385)      | 1:2000          |
